# Supplementary material for: Diagnosis, Evaluation, and Management of High Blood Pressure in Children and Adolescents
Source: Oxford University Press journal article supplement (doi:10.1542/peds.2018-2096), 2018-08-20
Supplement: peds20182096-sup-background-reviews.xlsx [file peds20182096-sup-background-reviews.xlsx]

## Sheet: Background-Reviews
References/Review Articles:	PICOT	KAS	Section	Original Ref #	CPG Ref #
National High Blood Pressure Education Program Working Group on High Blood Pressure in Children and Adolescents. The fourth report on the diagnosis, evaluation, and treatment of high blood pressure in children and adolescents. Pediatrics. 2004; 114(2 suppl 4th report):555–576	PICOT2	N/A, 15, 26, 1, 15	1, 3.1, 3.2, 4.2, 5.7, 6.5, 6.6, 11.2	198; 559	1
Institute of Medicine (US) Committee on Standards for Systematic Reviews of Comparative Effectiveness Research; Eden J, Levit L, Berg A, Morton S, editors. Finding What Works in Health Care: Standards for Systematic Reviews. Washington (DC): National Academies Press (US); 2011.	N/A	N/A	1.1	added	2
American Academy of Pediatrics Steering Committee on Quality Improvement and Management. Classifying recommendations for clinical practice guidelines. Pediatrics. 2004;114(3):874–877.	N/A	N/A	1.1	added	3
Mozaffarian D, Benjamin EJ, Go AS, Arnett DK, Blaha MJ, Cushman M, Das SR, de Ferranti S, Despres JP, Fullerton HJ, Howard VJ, Huffman MD, Isasi CR, Jimenez MC, Judd SE, Kissela BM, Lichtman JH, Lisabeth LD, Liu S, Mackey RH, Magid DJ, McGuire DK, Mohler ER, 3rd, Moy CS, Muntner P, Mussolino ME, Nasir K, Neumar RW, Nichol G, Palaniappan L, Pandey DK, Reeves MJ, Rodriguez CJ, Rosamond W, Sorlie PD…	N/A	N/A	2.2, 2.4	added	12
Sorof J, Daniels S. Obesity hypertension in children: a problem of epidemic proportions. Hypertension. 2002 Oct;40(4):441-7	N/A	N/A	2.3a	added	19
Kashyap SR, Defronzo RA. The insulin resistance syndrome: physiological considerations. Diab Vasc Dis Res. 2007 Mar;4(1):13-9	N/A	N/A	2.3a	added	37
Shatat IF, Flynn JT. Hypertension in children with chronic kidney disease. Adv Chronic Kidney Dis. 2005 Oct;12(4):378-84	N/A	N/A	2.3c, 4.7a	added	48
Seeman T. Hypertension after renal transplantation. Pediatr Nephrol. 2009 May;24(5):959-72	N/A	N/A	2.3c	added	50
Kaelber DC. IBM Explorys Cohort Discovery Tool, 9/2/2016. Available online at: www.explorys.net	N/A	N/A	2.3c	added	54
Barker DJ. The fetal and infant origins of adult disease. BMJ. 1990 Nov 17;301(6761):1111	N/A	N/A	2.3d, 6.2a, 6.3	added	55
Edvardsson VO, Steinthorsdottir SD, Eliasdottir SB, Indridason OS, Palsson R. Birth weight and childhood blood pressure. Curr Hypertens Rep. 2012 Dec;14(6):596-602	PICOT2	N/A; ;13	2.3d, 6.2a, 6.3	added	56
Lloyd-Jones DM, Hong Y, Labarthe D, Mozaffarian D, Appel LJ, Van Horn L, Greenlund K, Daniels S, Nichol G, Tomaselli GF, Arnett DK, Fonarow GC, Ho PM, Lauer MS, Masoudi FA, obertson RM, Roger V, Schwamm LH, Sorlie P, Yancy CW, Rosamond WD. Defining and setting national goals for cardiovascular health promotion and disease reduction: The merican Heart Association's strategic impact goal through 20…	N/A	N/A	2.4	added	70
Steinberger J, Daniels SR, Hagberg N, Isasi CR, Kelly AS, Lloyd-Jones D, Pate RR, Pratt C, Shay CM, Towbin JA, Urbina E, Van Horn LV, Zachariah JP; American Heart Association Atherosclerosis, Hypertension, and Obesity in the Young Committee of the Council on Cardiovascular Disease in the Young; Council on Cardiovascular and Stroke Nursing; Council on Epidemiology and Prevention; Council on Functi…	N/A	N/A	2.4	added	72
Rosner B, Cook N, Portman R, Daniels S, Falkner B. Determination of blood pressure percentiles in normal-weight children: some methodological issues. Am J Epidemiol. 2008 Mar 15;167(6):653-66.	N/A	N/A	3.2	added	77
Report of the Second Task Force on Blood Pressure Control in Children--1987.Task Force on Blood Pressure Control in Children. National Heart, Lung, and Blood Institute, Bethesda, Maryland. Pediatrics. 1987 Jan;79(1):1-25	N/A	N/A	3.3	added	81
Pickering TG, Hall JE, Appel LJ, Falkner BE, Graves J, Hill MN, Jones DW, Kurtz T, Sheps SG, Roccella EJ. Recommendations for blood pressure measurement in humans and experimental animals: part 1: blood pressure measurement in humans: a statement for professionals from the Subcommittee of Professional and Public Education of the American Heart Association Council on High Blood Pressure Research. …	N/A	N/A/10	4.1, 4.6, 4.8, 4.9	added	83
Mourad A, Carney S, Gillies A, et al. Arm position and blood pressure: a risk factor for hypertension? J Hum Hypertens 2003;17(6):389-395		N/A	Table 5	added	90
Centers for Disease Control and Prevention. National Health and Nutrition Examination Survey (NHANES) Anthropometry Procedures Manual. Available at: https://www.cdc.gov/nchs/data/nhanes/nhanes_07_08/manual_an.pdf. Published January 2013. Accessed May 9, 2016.	N/A	N/A	4.1	added	95
Maahs DM, Daniels SR, de Ferranti SD, Dichek HL, Flynn J, Goldstein BI, Kelly AS, Nadeau KJ, Martyn-Nemeth P, Osganian SK, Quinn L, Shah AS, Urbina E; American Heart Association Atherosclerosis, Hypertension and Obesity in Youth Committee of the Council on Cardiovascular Disease in the Young, Council on Clinical Cardiology, Council on Cardiovascular and Stroke Nursing, Council for High Blood Pres…	N/A	2	4.2, 8.2	added	110
Becker AM, Goldberg JH, Henson M, et al. Blood pressure abnormalities in children with sickle cell anemia. Pediatr Blood Cancer. 2014;61(3):518-522		N/A	Table 6	added	114
Alpert BS, Quinn D, Gallick D. Oscillometric blood pressure: a review for clinicians. J Am Soc Hypertens. 2014 Dec;8(12):930-8	PICOT1	5	4.5	added	127
Alpert BS. Oscillometric blood pressure values are algorithm-specific. Am J Cardiol. 2010 Nov 15;106(10):1524-1525	PICOT1	5	4.5	added	128
Chiolero A, Bovet P, Stergiou GS. Automated oscillometric blood pressure measurement in children. J Clin Hypertens (Greenwich). 2014 Jun;16(6):468	PICOT1	5	4.5	added	131
Flynn JT, Daniels SR, Hayman LL, Maahs DM, McCrindle BW, Mitsnefes M, Zachariah JP, Urbina EM, American Heart Association Atherosclerosis H and Obesity in Youth Committee of the Council on Cardiovascular Disease in the Y. Update: ambulatory blood pressure monitoring in children and adolescents: a scientific statement from the American Heart Association. Hypertension. 2014;63:1116-35	PICOT1	6, 7, 8	4.7, 4.7b, 4.8; Tables 12	85	155
Siu AL; U.S. Preventive Services Task Force. Screening for high blood pressure in adults: U.S. Preventive Services Task Force recommendation statement. Ann Intern Med. 2015 Nov 17;163(10):778-86.	PICOT1	6	4.7, 4.7b	added	156
Flynn JT. Differentiation between primary and secondary hypertension in children using ambulatory blood pressure monitoring. Pediatrics. 2002;110(1 Pt 1):89-93		N/A	Table 12	added	167
Dursun H, Bayazit AK, Cengiz N, et al. Ambulatory blood pressure monitoring and renal functions in children with a solitary kidney. Pediatr Nephrol. 2007;22(4):559-564		N/A	Table 12	added	168
Patzer L, Seeman T, Luck C, Wühl E, Janda J, Misselwitz J. Day- and night-time blood pressure elevation in children with higher grades of renal scarring. J Pediatr. 2003 Feb;142(2):117-22.		N/A	Table 12	added	169
Fidan K, Kandur Y, Buyukkaragoz B, Akdemir UO, Soylemezoglu O. Hypertension in pediatric patients with renal scarring in association with vesicoureteral reflux. Urology. 2013;81(1):173-177		N/A	Table 12	added	170
Basiratnia M, Esteghamati M, Ajami GH, et al. Blood pressure profile in renal transplant recipients and its relation to diastolic function: tissue Doppler echocardiographic study. Pediatr Nephrol. 2011;26(3):449-457		N/A	Table 12	added	171
Chaudhuri A, Sutherland SM, Begin B, Slasberry K, McCabe L, Potter D, Alexander SR, Wong CJ. Role of twenty-four-hour ambulatory blood pressure monitoring in children on dialysis. Clin J Am Soc Nephrol. 2011;6(4):870-876		N/A	Table 12	added	172
Chatterjee M, Speiser PW, Pellizzarri M, et al. Poor glycemic control is associated with abnormal changes in 24-hour ambulatory blood pressure in children and adolescents with type 1 diabetes mellitus. J Pediatr Endocrinol. 2009;22(11):1061-1067		N/A	Table 12	added	174
Darcan S, Goksen D, Mir S, et al. Alterations of blood pressure in type 1 diabetic children and adolescents. Pediatr Nephrol. 2006;21(5):672-676		N/A	Table 12	added	175
Dost A, Klinkert C, Kapellen T, et al. Arterial hypertension determined by ambulatory blood pressure profiles: contribution to microalbuminuria risk in a multicenter investigation in 2,105 children and adolescents with type 1 diabetes. Diabetes Care. 2008;31(4):720-725	PICOT3	N/A	Table 12	98	176
Ettinger LM, Freeman K, DiMartino-Nardi JR, Flynn JT. Microalbuminuria and abnormal ambulatory blood pressure in adolescents with type 2 diabetes mellitus. J Pediatr. 2005;147(1):67-73		N/A	Table 12	added	177
Lurbe E, Redon J, Kesani A, Pascual JM, Tacons J, Alvarez V, Batlle D. Increase in nocturnal blood pressure and progression to microalbuminuria in type 1 diabetes. New Engl J Med. 2002;347(11):797-805		N/A	Table 12	added	178
Lurbe E, Alvarez V, Liao Y, Tacons J, Cooper R, Cremades B, Torro I, Redon J. The impact of obesity and body fat distribution on ambulatory blood pressure in children and adolescents. Am J Hypertens. 1998;11(4 Pt 1):418-424		N/A	Table 12	added	189
Lurbe E, Alvarez V, Redon J. Obesity, body fat distribution, and ambulatory blood pressure in children and adolescents. J Clin Hypertens (Greenwich). 2001;3(6):362-367		N/A	Table 12	added	190
Marcovecchio ML, Patricelli L, Zito M, et al. Ambulatory blood pressure monitoring in obese children: role of insulin resistance. J Hypertens. 2006;24(12):2431-2436		N/A	Table 12	added	191
Shatat IF, Freeman KD, Vuguin PM, Dimartino-Nardi JR, Flynn JT. Relationship between adiponectin and ambulatory blood pressure in obese adolescents. Pediatr Res. 2009;65(6):691-695		N/A	Table 12	added	192
Amin RS, Carroll JL, Jeffries JL, et al. Twenty-four-hour ambulatory blood pressure in children with sleep-disordered breathing. Am J Respir Crit Care Med. 2004;169(8):950-956		N/A	Table 12	added	193
Leung LC, Ng DK, Lau MW, Chan CH, Kwok KL, Chow PY, Cheung JM. Twenty-four-hour ambulatory BP in snoring children with obstructive sleep apnea syndrome. Chest. 2006;130(4):1009-1017		N/A	Table 12	added	194
Akyurek N, Atabek ME, Eklioglu BS, Alp H. Ambulatory blood pressure and subclinical cardiovascular disease in children with Turner syndrome. Pediatr Cardiol. 2014;35(1):57-62		N/A	Table 12	added	195
Salgado CM, Jardim PC, Teles FB, Nunes MC. Low birth weight as a marker of changes in ambulatory blood pressure monitoring. Arq Bras Cardiol. 2009;92(2):107-121		N/A	Table 12	added	196
Gimpel C, Wühl E, Arbeiter K, Drozdz D, Trivelli A, Charbit M, Gellermann J, Dusek J, Jankauskiene A, Emre S, Schaefer F; ESCAPE Trial Group. Superior consistency of ambulatory blood pressure monitoring in children: implications for clinical trials. J Hypertens. 2009;27(8):1568-1574		N/A	Table 8	added	197
Sulakova T, Feber J. Should mean arterial pressure be included in the definition of ambulatory hypertension in children? Pediatr Nephrol. 2013;28(7):1105-1112		N/A	Table 9	added	198
Lurbe E, Redon J. Discrepancies in office and ambulatory blood pressure in adolescents: help or hindrance? Pediatr Nephrol. 2008 Mar;23(3):341-5. Review	PICOT1	N/A	4.7a	added	204
Urbina EM, Williams RV, Alpert BS, Collins RT, Daniels SR, Hayman L, Jacobson M, Mahoney L, Mietus-Snyder M, Rocchini A, Steinberger J, McCrindle B; American Heart Association Atherosclerosis, Hypertension, and Obesity in Youth Committee of the Council on Cardiovascular Disease in the Young. Noninvasive assessment of subclinical atherosclerosis in children and adolescents: recommendations for sta…	PICOT1	N/A	4.7a, 4.7b	306	206
Palatini P, Parati G. Blood pressure measurement in very obese patients: a challenging problem. J Hypertens. 2011 Mar;29(3):425-9		9	4.7b	added	211
Palatini P, Frick GN. Techniques for self-measurement of blood pressure: limitations and needs for future research. J Clin Hypertens (Greenwich) 2012;14:139-43	PICOT1	10	4.9	added	220
Young WF. Endocrine Hypertension. Thirteenth. (Melmed, Shlomo, Polonsky KS, Larsen PR KH, et). Philadelphia, pA: Elsevier Inc; 2016.		12	5.4, Table 10	added	248
Bausch B, Wellner U, Bausch D, et al. Long-term prognosis of patients with pediatric pheochromocytoma. Endocr Relat Cancer. 2014;21(1):17-25		N/A	Table 10	added	249
Waguespack SG, Rich T, Grubbs E, et al. A current review of the etiology, diagnosis, and treatment of pediatric pheochromocytoma and paraganglioma. J Clin Endocrinol Metab. 2010;95(5):2023-2037		N/A	Table 10	added	250
Fishbein L, Merrill S, Fraker DL, Cohen DL, Nathanson KL. Inherited mutations in pheochromocytoma and paraganglioma: why all patients should be offered genetic testing. Ann Surg Oncol. 2013;20(5):1444-1450		N/A	Table 10	added	251
Barontini M, Levin G, Sanso G. Characteristics of pheochromocytoma in a 4- to 20-year-old population. Ann N Y Acad Sci 2006;1073:30-37		N/A	Table 10	added	252
Welander J, Söderkvist P, Gimm O. Genetics and clinical characteristics of hereditary pheochromocytomas and paragangliomas. Endocr Relat Cancer. 2011;18(6):R253-R276		N/A	Table 10	added	253
Eisenhofer G, Peitzsch M. Laboratory evaluation of pheochromocytoma and paraganglioma. Clin Chem. 2014;60(12):1486-1499		N/A	Table 10	added	254
Funder JW, Carey RM, Mantero F, et al. The management of primary aldosteronism : case detection, diagnosis, and treatment: an Endocrine Society clinical practice guideline. J Clin Endocrinol Metab. 2016;101(5):1889-1916		N/A	Table 10	added	255
Stowasser M, Gordon RD. Monogenic mineralocorticoid hypertension. Best Pract Res Clin Endocrinol Metab. 2006;20(3):401-420		N/A	Table 10	added	256
White PC, Dupont J, New MI, Leiberman E, Hochberg Z, Rösler A. A mutation in CYP11B1 (Arg-448----His) associated with steroid 11 beta-hydroxylase deficiency in Jews of Moroccan origin. J Clin Invest. 1991;87(5):1664-1667		N/A	Table 10	added	257
Parsa AA, New MI. Low-renin hypertension of childhood. Endocrinol Metab Clin North Am. 2011;40(2011):369-377		N/A	Table 10	added	258
Parajes S, Loidi L, Reisch N, et al. Functional consequences of seven novel mutations in the CYP11B1 gene: Four mutations associated with nonclassic and three mutations causing classic 11??-hydroxylase deficiency. J Clin Endocrinol Metab. 2010;95(2):779-788		N/A	Table 10	added	259
New MI, Geller DS, Fallo F, Wilson RC. Monogenic low renin hypertension. Trends Endocrinol Metab. 2005;16(3):92-97		N/A	Table 10	added	260
Imai T, Yanase T, Waterman MR, Simpson ER, Pratt JJ. Canadian Mennonites and individuals residing in the Friesland region of the Netherlands share the same molecular basis of 17??-hydroxylase deficiency. Hum Genet. 1992;89(1):95-96		N/A	Table 10	added	261
Dhir V, Reisch N, Bleicken CM, et al. Steroid 17alpha-hydroxylase deficiency: functional characterization of four mutations (A174E, V178D, R440C, L465P) in the CYP17A1 gene. J Clin Endocrinol Metab. 2009;94(8):3058-3064		N/A	Table 10	added	262
Speiser PW, White PC. Congenital adrenal hyperplasia. N Engl J Med 2003;349(8):776-788		N/A	Table 10	added	264
Funder JW. Genetic disorders in primary aldosteronism — familial and somatic. J Steroid Biochem Mol Biol 2017;165(Pt A):154-157		N/A	Table 10	added	265
Carss KJ, Stowasser M, Gordon RD, O’Shaughnessy KM. Further study of chromosome 7p22 to identify the molecular basis of familial hyperaldosteronism type II. J Hum Hypertens. 2011;25(9):560-564		N/A	Table 10	added	266
So A, Duffy DL, Gordon RD, et al. Familial hyperaldosteronism type II is linked to the chromosome 7p22 region but also shows predicted heterogeneity. J Hypertens. 2005;23(8):1477-1484		N/A	Table 10	added	267
Geller DS, Zhang J, Wisgerhof MV, Shackleton C, Kashgarian M, Lifton RP. A novel form of human mendelian hypertension featuring nonglucocorticoid-remediable aldosteronism. J Clin Endocrinol Metab 2008;93(8):3117-3123		N/A	Table 10	added	268
Boulkroun S, Beuschlein F, Rossi G, et al. Prevalence, clinical and molecular correlated of KCNJ5 mutations in primary aldosteronism. Hypertension. 2012;59(3):592-598		N/A	Table 10	added	269
Scholl UI, Nelson-Williams C, Yue P, Grekin R, Wyatt RJ, Dillon MJ, Couch R, Hammer LK, Harley FL, Farhi A, Wang WH, Lifton RP. Hypertension with or without adrenal hyperplasia due to different inherited mutations in the potassium channel KCNJ5. Proc Natl Acad Sci U S A 2012;109(7):2533-2538		N/A	Table 10	added	270
Scholl UI, Goh G, Stölting G, de Oliveira RC, Choi M, Overton JD, Fonseca AL, Korah R, Starker LF, Kunstman JW, Prasad ML, Hartung EA, Mauras N, Benson MR, Brady T, Shapiro JR, Loring E, Nelson-Williams C, Libutti SK, Mane S, Hellman P, Westin G, Åkerström G, Björklund P, Carling T, Fahlke C, Hidalgo P, Lifton RP. Somatic and germline CACNA1D calcium channel mutations in aldosterone-producing ade…		N/A	Table 10	added	271
Scholl UI, Stölting G, Nelson-Williams C, Vichot AA, Choi M, Loring E, Prasad ML, Goh G, Carling T, Juhlin CC, Quack I, Rump LC, Thiel A, Lande M, Frazier BG, Rasoulpour M, Bowlin DL, Sethna CB, Trachtman H, Fahlke C, Lifton RP. Recurrent gain of function mutation in calcium channel CACNA1H causes early-onset hypertension with primary aldosteronism. Elife. 2015 Apr 24;4:e06315		N/A	Table 10	added	272
Rothenbuhler A, Stratakis CA. Clinical and molecular genetics of Carney complex. Best Pract Res Clin Endocrinol Metab. 2010;24(3):389–399		N/A	Table 10	added	273
Stratakis CA, Salpea P, Raygada M. Carney Complex. Seattle, WA: University of Washington, Seattle; 2015		N/A	Table 10	added	274
Lietman SA, Schwindinger WF, Levine MA. Genetic and molecular aspects of McCune-Albright syndrome. Pediatr Endocrinol Rev. 2007;4(Suppl 4):380–385		N/A	Table 10	added	275
Lumbroso S, Paris F, Sultan C. McCune-Albright syndrome: molecular genetics. J Pediatr Endocrinol Metab. 2002;15(Suppl 3):875–882		N/A	Table 10	added	276
Malchoff CD, Javier EC, Malchoff DM, Martin T, Rogol A, Brandon D, Loriaux DL, Reardon GE. Primary cortisol resistance presenting as isosexual precocity. J Clin Endocrinol Metab. 1990;70(2):503-507		N/A	Table 10	added	277
Nicolaides NC, Charmandari E. Chrousos syndrome: from molecular pathogenesis to therapeutic management. Eur J Clin Invest. 2015;45(5):504-514		N/A	Table 10	added	278
Malchoff DM, Brufsky A, Reardon G, et al. A mutation of the glucocorticoid receptor in primary cortisol resistance. J Clin Invest. 1993;91(5):1918-1925		N/A	Table 10	added	279
Ferrari P. The role of 11β-hydroxysteroid dehydrogenase type 2 in human hypertension. Biochim Biophys Acta. 2010;1802(12):1178-1187		N/A	Table 10	added	280
Morineau G, Sulmont V, Salomon R, et al. Apparent mineralocorticoid excess: report of six new cases and extensive personal experience. J Am Soc Nephrol. 2006;17(11):3176-3184		N/A	Table 10	added	281
Nesterov V, Krueger B, Bertog M, Dahlmann A, Palmisano R, Korbmacher C. In Liddle syndrome, epithelial sodium channel is hyperactive mainly in the early part of the aldosterone-sensitive distal nephron. Hypertension. 2016;67(6):1256-1262		N/A	Table 10	added	282
Hanukoglu I, Hanukoglu A. Epithelial sodium channel (ENaC) family: Phylogeny, structure-function, tissue distribution, and associated inherited diseases. Gene. 2016;579(2):95-132		N/A	Table 10	added	283
Geller DS, Farhi A, Pinkerton N, et al. Activating mineralocorticoid receptor mutation in hypertension exacerbated by pregnancy. Science 2000;289(July):119-123		N/A	Table 10	added	284
Wilson FH, Disse-Nicodeme S, Choate KA, et al. Human hypertension caused by mutations in WNK kinases. Science. 2001;293(5532):1107-1112		N/A	Table 10	added	285
Boyden LM, Choi M, Choate KA, Nelson-Williams CJ, Farhi A, Toka HR, Tikhonova IR, Bjornson R, Mane SM, Colussi G, Lebel M, Gordon RD, Semmekrot BA, Poujol A, Välimäki MJ, De Ferrari ME, Sanjad SA, Gutkin M, Karet FE, Tucci JR, Stockigt JR, Keppler-Noreuil KM, Porter CC, Anand SK, Whiteford ML, Davis ID, Dewar SB, Bettinelli A, Fadrowski JJ, Belsha CW, Hunley TE, Nelson RD, Trachtman H, Cole TR, P…		N/A	Table 10	added	286
Stowasser, Michael, Pimenta E, Gordon RD. Familial or genetic primary aldosteronism and Gordon syndrome. Endocrinol Metab Clin North Am. 2011;40(2):343-368		N/A	Table 10	added	287
Sacerdote A, Weiss K, Tran T, Rokeya Noor B, McFarlane SI. Hypertension in patients with Cushing’s disease: pathophysiology, diagnosis, and management. Curr Hypertens Rep. 2005;7(3):212-218		N/A	Table 10	added	288
Baid S, Nieman LK. Glucocorticoid excess and hypertension. Curr Hypertens Rep. 2004;6(6):493-499		N/A	Table 10	added	289
Michalkiewicz E, Sandrini R, Figueiredo B, et al. Clinical and outcome characteristics of children with adrenocortical tumors: a report from the International Pediatric Adrenocortical Tumor Registry. J Clin Oncol. 2004;22(5):838-845		N/A	Table 10	added	290
Danzi S, Klein I. Thyroid hormone and blood pressure regulation. Curr Hypertens Rep 2003;5(6):513-520		N/A	Table 10	added	291
Bahn RS, Burch HB, Cooper DS, Garber JR, Greenlee MC, Klein I, Laurberg P, McDougall IR, Montori VM, Rivkees SA, Ross DS, Sosa JA, Stan MN; American Thyroid Association.; American Association of Clinical Endocrinologists. Hyperthyroidism and other causes of thyrotoxicosis: management guidelines of the American Thyroid Association and American Association of Clinical Endocrinologists. Endocr Pract…		N/A	Table 10	added	292
Heyliger A, Tangpricha V, Weber C, Sharma J. Parathyroidectomy decreases systolic and diastolic blood pressure in hypertensive patients with primary hyperparathyroidism. Surgery. 2009;146(6):1042-1047		N/A	Table 10	added	293
Park JD, Zheng W. Human exposure and health effects of inorganic and elemental mercury. J Prev Med Public Health. 2012 Nov;45(6):344-52		N/A	5.5	added	306
Weidemann DK, Weaver VM, Fadrowski JJ. Toxic environmental exposures and kidney health in children. Pediatr Nephrol. 2016 Nov;31(11):2043-54		N/A	5.5	added	307
Torres AD, Rai AN, Hardiek ML. Mercury intoxication and arterial hypertension: report of two patients and review of the literature. Pediatrics. 2000 Mar;105(3):E34		N/A	5.5	added	308
Vehaskari VM. Heritable forms of hypertension. Pediatr Nephrol. 2009 Oct;24(10):1929-3	PICOT2	N/A	5.8	93	328
Halperin F, Dluhy RG. Glucocorticoid-remediable aldosteronism. Endocrinol Metab Clin North Am. 2011 Jun;40(2):333-41, viii.	PICOT2	N/A	5.8	92	329
Institute of Medicine. Strategies to reduce sodium intake in the United States. Washington, DC: National Academies Press, 2010	N/A	13	1.2, 6.2b	added	337
Torrance B, McGuire KA, Lewanczuk R, McGavock J. Overweight, physical activity and high blood pressure in children: a review of the literature. Vasc Health Risk Manag. 2007;3(1):139-149	PICOT3	N/A, 20	6.2c, 7.2b	184	340
Hagan JF SJ, Duncan PM. Guidelines for Health Supervision of Infants, Children and Adolescents, Third Edition. Elk Grove Village, IL: American Academy of Pediatrics; 2008		13	6.2d	added	351
Flynn JT. Evaluation and management of hypertension in childhood. Prog Pediatr Cardiol. 2001 Jan;12(2):177-188		Table 12	6.3	added	353
Armstrong AC, Gidding SS, Gjesdal O, Wu C, Bluemke DA, Lima JA. LV mass assessed by echocardiography and CMR, cardiovascular outcomes, and medical practice. JACC Cardiovasc Imaging. 2012 Aug; 5(8): 837-48	PICOT2	15	6.6	added	363
Lang RM, Badano LP, Mor-Avi V, Afilalo J, Armstrong A, Ernande L, Flachskampf FA, Foster E, Goldstein SA, Kuznetsova T, Lancellotti P, Muraru D, Picard MH, Rietzschel ER, Rudski L, Spencer KT, Tsang W, Voigt JU. Recommendations for cardiac chamber quantification by echocardiography in adults: an update from the American Society of Echocardiography and the European Association of Cardiovascular Im…	PICOT2	15	6.6	added	369
Lopez L, Colan SD, Frommelt PC, Ensing GJ, Kendall K, Younoszai AK, Lai WW, Geva T, Recommendations for quantification methods during the performance of a pediatric echocardiogram: a report from the Pediatric Measurements Writing Group of the American Society of Echocardiography Pediatric and Congenital Heart Disease Council., J Am Soc Echocardiogr. 2010 May;23(5):465-95		15	6.6	added	371
Khoury PR, Mitsnefes M, Daniels SR, Kimball TR. Age-specific reference intervals for indexed left ventricular mass in children. J Am Soc Echocardiogr. 2009 Jun;22(6):709-14		15	6.6	added	373
Lipshultz SE, Easley KA, Orav EJ, Kaplan S, Starc TJ, Bricker JT, Lai WW, Moodie DS, Sopko G, Schluchter MD, Colan SD. Reliability of multicenter pediatric echocardiographic measurements of left ventricular structure and function: the prospective P(2)C(2) HIV study. Circulation. 2001 Jul 17;104(3):310-6		15	6.6	added	374
Urbina EM. Abnormalities of vascular structure and function in pediatric hypertension. Pediatr Nephrol. 2016 Jul;31(7):1061-70	PICOT4	N/A	6.7	added	375
Marks SD, Tullus K. Update on imaging for suspected renovascular hypertension in children and adolescents. Curr Hypertens Rep. 2012 Dec;14(6):591-5.	PICOT2	16/17	6.8	2	390
Reusz GS, Kis E, Cseprekál O, Szabó AJ, Kis E. Captopril-enhanced renal scintigraphy in the diagnosis of pediatric hypertension. Pediatr Nephrol. 2010 Feb;25(2):185-9		16	6.8	added	394
Chugh A, Bakris GL. Microalbuminuria: what is it? Why is it important? What should be done about it? An update. J Clin Hypertens (Greenwich). 2007 Mar;9(3):196-200		18	6.10	added	407
Flynn JT. Microalbuminuria in Children With Primary Hypertension. J Clin Hypertens (Greenwich). 2016 Oct;18(10):962-965	PICOT2	18	6.10	added	408
Tsioufis C, Mazaraki A, Dimitriadis K, Stefanidis CJ, Stefanadis C. Microalbuminuria in the paediatric age: current knowledge and emerging questions. Acta Paediatr. 2011 Sep;100(9):1180-4	PICOT2	18	6.10	added	410
Chobanian AV, Bakris GL, Black HR, Cushman WC, Green LA, Izzo JL Jr, Jones DW, Materson BJ, Oparil S, Wright JT Jr, Roccella EJ; Joint National Committee on Prevention, Detection, Evaluation, and Treatment of High Blood Pressure. National Heart, Lung, and Blood Institute.; National High Blood Pressure Education Program Coordinating Committee.. Seventh report of the Joint National Committee on Pre…	PICOT3	N/A	7.2, 9.3	added	419
Pacifico L, Anania C, Martino F, Poggiogalle E, Chiarelli F, Arca M, Chiesa C. Management of metabolic syndrome in children and adolescents. Nutr Metab Cardiovasc Dis. 2011 Jun;21(6):455-66	PICOT3	N/A	7.2c	added	433
Puri M, Flynn JT. Management of hypertension in children and adolescents with the metabolic syndrome. J Cardiometab Syndr. 2006 Summer;1(4):259-68	PICOT3	N/A	7.2c	added	434
Davis MM, Gance-Cleveland B, Hassink S, Johnson R, Paradis G, Resnicow K. Recommendations for Prevention of Childhood Obesity. Pediatrics Dec 2007, 120 (Supplement 4) S229-S253	PICOT3	N/A	7.2c	added	435
Spear BA, Barlow SE, Ervin C, Ludwig DS, Saelens BE, Schetzina KE, Taveras EM. Recommendations for treatment of child and adolescent overweight and obesity. Pediatrics. 2007 Dec;120 Suppl 4:S254-88. Review	PICOT3	N/A	7.2c	added	444
Kabat-Zinn J, Hanh TN. Full catastrophe living: Using the wisdom of your body and mind to face stress, pain, and illness. The program of the stress reduction clinic at the university of massachusetts medical center. 1990. Delta: New York, NY	PICOT3	N/A	7.2d	added	445
Herder SD, Weber E, Winkemann A, Herder C, Morck H. Efficacy and safety of angiotensin II receptor type 1 antagonists in children and adolescents. Pediatr Nephrol. 2010 May;25(5):801-11.	PICOT3/PICOT4	21/24	7.3a, 8.1b	311/94	451
Flynn JT, Tullus K. Severe hypertension in children and adolescents: pathophysiology and treatment. Pediatr Nephrol. 2009 Jun;24(6):1101-12. Erratum in: Pediatr Nephrol. 2012 Mar;27(3):503-4		27	11.1	added	533
Simonetti GD, Rizzi M, Donadini R, Bianchetti MG. Effects of antihypertensive drugs on blood pressure and proteinuria in childhood. J Hypertens. 2007 Dec;25(12):2370-6	PICOT3	21/24	7.3a, 8.1b	270	463
Blowey DL. Update on the pharmacologic treatment of hypertension in pediatrics. J Clin Hypertens (Greenwich). 2012 Jun;14(6):383-7	PICOT3	21	7.3a	614	466
Pediatric Product Development (2016/08/23). Retrieved from http://www.fda.gov/Drugs/DevelopmentApprovalProcess/DevelopmentResources/ucm049867.html		21	7.3a	added	468
Croxtall JD. Valsartan: in children and adolescents with hypertension. Paediatr Drugs. 2012 Jun 1;14(3):201-7.	PICOT4	21	7.3b	67	469
White WB, Turner JR, Sica DA, Bisognano JD, Calhoun DA, Townsend RR, Aronow HD, Bhatt DL, Bakris GL. Detection, evaluation, and treatment of severe and resistant hypertension: proceedings from an American Society of Hypertension Interactive forum held in Bethesda, MD, U.S.A., October 10th 2013. J Am Soc Hypertens. 2014 Oct;8(10):743-57		N/A	7.4	added	475
Narayan H, Webb DJ. New Evidence Supporting the Use of Mineralocorticoid Receptor Blockers in Drug-Resistant Hypertension. Curr Hypertens Rep. 2016 Apr;18(5):34		N/A	7.4	added	476
Dionne JM. Evidence-based guidelines for the management of hypertension in hildren with chronic kidney disease. Pediatr Nephrol. 2015 Nov;30(11):1919-27	PICOT3	23	8.1a	366	479
VanDeVoorde RG, Mitsnefes MM. Hypertension and CKD. Adv Chronic Kidney Dis. 2011 Sep;18(5):355-61	PICOT3	23	8.1a	added	480
American Diabetes Association. Supplemental issue: standards of medical care in diabetes - 2016. Diabetes Care. 2016;39(suppl 1):S1–S2	N/A	26	8.2	added	499
Donaghue KC, Chiarelli F, Trotta D, Allgrove J, Dahl-Jorgensen K. Microvascular and macrovascular complications associated with diabetes in children and adolescents. Pediatr Diabetes. 2009 Sep;10 Suppl 12:195-203	N/A	26	8.2	added	500
Expert Panel on Integrated Guidelines for Cardiovascular Health and Risk Reduction in Children and Adolescents.; National Heart, Lung, and Blood Institute.. Expert panel on integrated guidelines for cardiovascular health and risk reduction in children and adolescents: summary report. Pediatrics. 2011 Dec;128 Suppl 5:S213-56	N/A	N/A	Table 14	579	501
Stern MP. Diabetes and cardiovascular disease. The "common soil" hypothesis. Diabetes. 1995 Apr;44(4):369-74	N/A	N/A	9.1	added	502
Marcus CL, Brooks LJ, Draper KA, Gozal D, Halbower AC, Jones J, Schechter MS, Ward SD, Sheldon SH, Shiffman RN, Lehmann C, Spruyt K; American Academy of Pediatrics. Diagnosis and management of childhood obstructive sleep apnea syndrome. Pediatrics. 2012 Sep;130(3):e714-55.	N/A	N/A	9.2	added	507
Lande MB, Kupferman JC, Adams HR. Neurocognitive alterations in hypertensive children and adolescents. J Clin Hypertens. 2012;14: 353-359	N/A	N/A	9.3	added	514
Ong KL, Cheung BM, Man YB, Lau CP, Lam KS. Prevalence, awareness, treatment,and control of hypertension among United States adults 1999-2004. Hypertension. 2007 Jan;49(1):69-75	N/A	N/A	10	added	516
Guo F, He D, Zhang W, Walton RG. Trends in prevalence, awareness, management, and control of hypertension among United States adults, 1999 to 2010. J Am Coll Cardiol. 2012 Aug 14;60(7):599-606	N/A	N/A	10	289	517
Hajjar I, Kotchen TA. Trends in prevalence, awareness, treatment, and control of hypertension in the United States, 1988-2000. JAMA. 2003 Jul 9;290(2):199-206	N/A	N/A	10	added	518
Flynn JT, Mottes TA, Brophy PD, Kershaw DB, Smoyer WE, Bunchman TE. Intravenous nicardipine for treatment of severe hypertension in children. J Pediatr. 2001 Jul;139(1):38-43	4		11.1	added	524
Baracco R, Mattoo TK. Pediatric hypertensive emergencies. Curr Hypertens Rep. 2014 Aug;16(8):456		27	11.1	added	532
Flynn JT, Tullus K. Correction to: "Severe hypertension in children and adolescents: pathophysiology and treatment". Pediatr Nephrol. 2012 Mar;27(3):503-4;		27	11.1	added	533
Patel NH, Romero SK, Kaelber DC. Evaluation and management of pediatric hypertensive crises: hypertensive urgency and hypertensive emergencies. Open Access Emerg Med. 2012 Sep 5;4:85-92	PICOT3	27	11.1	362	534
Black HR, Sica D, Ferdinand K, White WB. Eligibility and Disqualification Recommendations for Competitive Athletes With Cardiovascular Abnormalities: Task Force 6: Hypertension: A Scientific Statement from the American Heart Association and the American College of Cardiology. J Am Coll Cardiol. 2015 Dec 1;66(21):2393-7.	N/A	28, 29	11.2	added	539
American Academy of Pediatrics; American Academy of Family Physicians; American College of Physicians; Transitions Clinical Report Authoring Group, Cooley WC, Sagerman PJ. Supporting the health care transition from adolescence to adulthood in the medical home. Pediatrics. 2011 Jul;128(1):182-200.	N/A	30	12	added	546
Stabouli S, Papakatsika S, Kotsis V. The role of obesity, salt and exercise on blood pressure in children and adolescents. Expert Rev Cardiovasc Ther. 2011 Jun;9(6):753-61	N/A	N/A	13.2	added	549
Gillman MW, Ellison RC. Childhood prevention of essential hypertension. Pediatr Clin North Am. 1993 Feb;40(1):179-94	N/A	N/A	13.2	added	551
Krousel-Wood MA, Muntner P, He J, Whelton PK. Primary prevention of essential hypertension. Med Clin North Am. 2004 Jan;88(1):223-38	N/A	N/A	13.2	added	552
Whelton PK, He J, Appel LJ, Cutler JA, Havas S, Kotchen TA, Roccella EJ, Stout R, Vallbona C, Winston MC, Karimbakas J; National High Blood Pressure Education Program Coordinating Committee. Primary prevention of hypertension: clinical and public health advisory from The National High Blood Pressure Education Program. JAMA. 2002 Oct 16;288(15):1882-8.	N/A	N/A	13.2	added	553
American Academy of Pediatrics. EQIPP: hypertension recognition and management. http://shop.aap.org/eqipp-hypertension-identification-and-management	N/A	N/A	14	added	556
American Academy of Pediatrics, Council on Quality Improvement and Patient Safety. Implementation guide. Available at https://www.aap.org/en-us/about-the-aap/Committees-Councils-Sections/coqips/Pages/Implementation-Guide.aspx	N/A	N/A	14	added	557
Bradshaw B. The role of the family in managing therapy in minority children with type 2 diabetes mellitus. J Pediatr Endocrinol Metab. 2002 Apr;15 Suppl 1:547-51	N/A	N/A	15.3	added	561
Thompson M, Dana T, Bougatsos C, Blazina I, Norris SL. Screening for hypertension in children and adolescents to prevent cardiovascular disease. Pediatrics. 2013 Mar;131(3):490-525	N/A	N/A	16	added	566
Urbina EM, de Ferranti S, Steinberger J. Observational studies may be more important than randomized clinical trials: weaknesses in US Preventive Services Task Force recommendation on blood pressure screening in youth. Hypertension. 2014; 63:638-640	N/A	N/A	16	added	567
Flynn JT. Ambulatory blood pressure monitoring in children: imperfect yet essential. Pediatr Nephrol. 2011 Dec;26(12):2089-94	N/A	N/A	16	added	568
Muntner P, Becker RC, Calhoun D, Chen d, Cowley AW, Flynn JT, Grobe JL, Kidambi S, Kotchen TA, Lackland D, Leslie KK, Li Y, Liang M, Lloyd A, Mattson DL, Mendizabal B, Mitsnefes M, Nair A, Pierce GL, Pollock JS, Safford MM, Santillan MK, Sigmund CD, Thomas SJ, Urbina EM. Introduction to the American Heart Association’s hypertension strategically focused research network. Hypertension 2016; 67:674…	N/A	N/A	16	added	570
