# Supplementary material for: Diagnosis, Evaluation, and Management of High Blood Pressure in Children and Adolescents
Source: Oxford University Press journal article supplement (doi:10.1542/peds.2018-2096), 2018-08-20
Supplement: peds20182096-sup-primaryreferences.xlsx [file peds20182096-sup-primaryreferences.xlsx]

## Sheet: Primary References
PICOT	Ref# in CPG	Original Ref #	Author (s)	KASs/Comments	Section	Year	Title	Journal	Citation	LOE (AAP): A, B, C, D/EO (expert opinion)	Category of Article: 1 (systematic review/meta-analysis); 2 (cross-sectional study); 3 (case-control); 4 (cohort); 5 (expert opinion); 6 (other)	Primary Population: Neonates [0-1 month), Infants [1-12 months], Children [1-13), Adolescents [13-18), Adults [18, older)	Sample Size	Subpopulation (Prematurity, Obese, Diabetes, Minorities, CKD, Dyslipidemia, h/o transplant)	Method of Blood Pressure Assessment: 1 (Oscillometric); 2 (ABPM); 3 (Forearm); 4 (Other)	Intervention (PICOT 3/4)	Control/ Comparison (if experimental study)	Outcome Variable (for PICOT 4: CVD risk endpoint: 1 CIMT, 2 FMD, 3 LVH, 4 microalbuminuria)	Quality of BP assessment (at least 3 blood pressure measurements, 4th report definition of HTN); yes/no	Findings/Results	Benefit	Harm	B=H, B>H, B<H	Limitations:
N/A	4	added	Rosner B, Cook NR, Daniels S, Falkner B	N/A	2.1, 2.3a, 4.4, 6.2b	2013	Childhood blood pressure trends and risk factors for high blood pressure: the NHANES experience 1988-2008	Hypertension	Rosner B, Cook NR, Daniels S, Falkner B. Childhood blood pressure trends and risk factors for high blood pressure: the NHANES experience 1988-2008.Hypertension. 2013 Aug;62(2):247-54	B	Cross-sectional	Children and Adolescents	NHANES III, N=3248; NHANES 1999-2008, N=8388	8 to 17 years of age; NHANES; multi-race, both genders, multi-ethnic	4- mercury sphygmonometer	N/A	N/A	SBP, DBP; elevated BP defined as SBP or DBP >90th percentile	No (not all participants had at least 3 measurements)	Prevalence of elevated blood pressure: Boys (NHANES III: 15.8%, NHANES 1999-2008: 19.2%), Girls (NHANES III: 8.2%, NHANES 1999-2008: 12.6%); Prevalence of elevated BP in children increased from 1988 to 2008; increase in part is related to changes in obesity and Na intake.	Knowledge of the prevalence of elevated blood pressure with comparisons over time	NHANES III: over sampling of particular populations including Mexican Americans and non-Hispanic Black Americans	B>H	Excluded Asians and other ethnic minorities. Only African-Americans and Mexican-Americans included. Up to 3 measurements during a single session only.
N/A	5	305	Din-Dzietham R, Liu Y, Bielo MV, Shamsa F	N/A	2.1, 4.2	2007	High Blood Pressure Trends in Children and Adolescents in National Surveys, 1963 to 2002	Circulation	Din-Dzietham R, Liu Y, Bielo MV, Shamsa F. High blood pressure trends in children and adolescents in national surveys, 1963 to 2002. Circulation. 2007 Sep 25;116(13):1488-96.	C/B	Cross-sectional	Children and adolescents	N=~40,000	8 to 17 years of age, National Health Examination (NHES) data and the Hispanic Health and Nutrition Examination Survey (NHANES); including Mexican Americans, Non-Hispanic Blacks	4- mercury sphygmonometer	N/A	N/A	Prevalence of pre-HTN and HTN	No	Rising prevalence of HTN/HBP; Higher prevalence of pre-HTN and HTN among non Hispanic blacks and Mexican Americans than among non-Hispanic whites.	Knowledge of the prevalence of hypertension in children	None reported	B>H	Not all ethnicities reflected in this study. Up to 3 measurements during a single session only. Variation in BP measurement across study periods.
N/A	6	added	Kit BK, Kuklina E, Carroll MD, Ostchega Y, Freedman DS, Ogden CL	N/A	2.1	2015	Prevalence and Trends in Dyslipidemia and Blood Pressure among US Children and Adolescents, 1999-2012	JAMA pediatrics	Kit BK, Kuklina E, Carroll MD, Ostchega Y, Freedman DS, Ogden CL. Prevalence and Trends in Dyslipidemia and Blood Pressure among US Children and Adolescents, 1999-2012. JAMA pediatrics. 2015;169:272-279	B	Cross-sectional	Children and adolescents	N=1665	8 to 17 years of age; NHANES; Multi-race, both genders, mult-ethnic; Oversampling of non-Hispanic Asian persons	4- mercury sphygmonometer	N/A	N/A	Adverse TC, HDL, LDL, non-HDL cholesterol; Adverse BP (as determined by 4 th report)	Yes- 3 measurements	20% of adolescents, 8-17 years of age, with an abnormal TC, HDL,non-HDL TC; Greater than 1/10 with either borderline or high BP; Overall, there was no linear change in prevalence of borderline high BP between 1999-2000 and 2011-2012 (7.6% [95% CI, 5.8-9.8] vs 9.4% [95% CI, 7.2-11.9]; P = .90), nor was there a linear change in high or borderline high BP (1999-2000, 10.6% [95% CI, 8.4-13.1]; 2011-2…	Knowledge of prevalence of adverse lipid and BP values	Cut points for BP and dyslipidemia are not based upon cardiovascular related events but on statistical definitions and expert opinion.	B>H	High relative standard error for certain groups: non-Hispanic black, Hispanic, non-Hispanic white, overweight and obese groups.
N/A	7	added	Hansen ML, Gunn PW, Kaelber DC	4	2.1, 14	2007	Underdiagnosis of hypertension in children and adolescents	JAMA	Hansen ML, Gunn PW, Kaelber DC. Underdiagnosis of hypertension in children and adolescents. JAMA. 2007 Aug 22;298(8):874-9	B	Retrospective cohort study	Children and adolescents	N=14,187	Single center study of children 3 to 18 years of age; Mutli-race, both genders, multi-ethnic (Ohio, single health care system)	Unknown (1 and 4); BP data extracted from HER	N/A	N/A	Race/ethnicity, age, sex, weight, height, BP readings	Yes- 3 measurements	1. N=507 children (3.6%) with hypertension 2. only 26% had a diagnosis of HTN or elevated BP in the medical record. 3. Factors predictive of an increased odds of correctly diagnosing HTN or elevated BP: 1 year increase in age over 3 years of age, number of elevated blood pressure readings beyond 3, having an obesity-related diagnosis, and number of blood pressure readings in the stage 2 hypertens…	Recognition prevalence and underdiagnosis of elevated BP and HTN in children	Single health system	B>H	Single health system. Oscillometric measurements included (potential for overestimation of true prevalence of hypertension).
PICOT1	8	187	McNiece KL, Poffenbarger TS, Turner JL, Franco KD, Sorof JM, Portman RJ	3	2.1, 4.1	2007	Prevalence of Hypertension and Pre-Hypertension among Adolescents	Journal of Pediatrics	McNiece KL, Poffenbarger TS, Turner JL, Franco KD, Sorof JM, Portman RJ. Prevalence of hypertension and pre-hypertension among adolescents. J Pediatr. 2007 Jun;150(6):640-4, 644.e1.	C/B	Cross-sectional	Children and adolescents	N=6790	11 to 17 years of age, Houston public schools; Diverse population: White (37%), Black (28%), Asian (8%).	1- OBPM	N/A	none	prevalence of Normal BP, pre HTN, stage 1 HTN, Stage 2 HTN	yes	~20% of adolescents with elevated BP are at risk for hypertension. Approximately 3.2% of the population have hypertension. Hypertension and pre-hypertension increase with increasing body mass index.	N/A	N/A	B=H	Single school district/ geographic location.
N/A	9	46	Chiolero A, Cachat F, Burnier M, Paccaud F, Bovet P	N/A	2.1	2007	Prevalence of hypertension in schoolchildren based on repeated measurements and association with overweight	Journal of hypertension	Chiolero A, Cachat F, Burnier M, Paccaud F, Bovet P. Prevalence of hypertension in schoolchildren based on repeated measurements and association with overweight. J Hypertens. 2007 Nov;25(11):2209-17.	B	Cross-sectional	Children	N= 6873	obese, overweight, Swiss 6th graders	1 (validated by sphyngomanometer)	N/A	N/A	SBP, DBP following multiple measurements (school measurments using standard protocol)	yes	Prevalence of HTN declines w/ repeat measure: 1st visit (11%), 2nd visit (3.8%), 3rd visit (2.2%); higher prevalence among obese (higher BMI) and children of less well educated parents	Knowledge of the impact of repeated measure on BP assessment	None reported	B>H
PICOT3	11	added	Theodore RF, Broadbent J, Nagin D, Ambler A, Hogan S, Ramrakha S, Cutfield W, Williams MJ, Harrington H, Moffitt TE, Caspi A, Milne B, Poulton R	N/A	2.1, 7.1	2015	Childhood to Early-Midlife Systolic Blood Pressure Trajectories: Early-Life Predictors, Effect Modifiers, and Adult Cardiovascular Outcomes	Hypertension	Theodore RF, Broadbent J, Nagin D, Ambler A, Hogan S, Ramrakha S, Cutfield W, Williams MJ, Harrington H, Moffitt TE, Caspi A, Milne B, Poulton R. Childhood to Early-Midlife Systolic Blood Pressure Trajectories: Early-Life Predictors, Effect Modifiers, and Adult ardiovascular Outcomes. Hypertension. 2015 Dec;66(6):1108-15.	B	Prospective cohort study	Children, adolescents and adults	N= 1037	Dunedin, New Zealand; Children followed over time ( 7 to 38 years of age); normotensive, high-normal prehypertensive, and hypertensive	4- Mercury sphyngomanometer	N/A	N/A	Waiste-hip ratio, LDL, HDL, TG, compositive index of metabolic risk factors	2-3 measurements/visit	Higher body mass index and cigarette smoking resulted in increasing blood pressure across trajectories, particularly for the higher blood pressure groups. Prehypertensive and hypertensive trajectory groups had worse cardiovascular outcomes by early midlife. Harmful blood pressure trajectories are identifiable in childhood, associated with both antecedent and modifiable risk factors over time, and…	Earlier recognition and treatment may lead to improved outcome.	None reported	B>H	Non US population. Study population may not be reflective of US population.
N/A	13	added	Liberman JN, Berger JE, Lewis M	N/A	2.2	2009	Prevalence of antihypertensive, antidiabetic, and dyslipidemic prescription medication use among children and adolescents	Arch Pediatr Adolesc Med	Liberman JN, Berger JE, Lewis M. Prevalence of antihypertensive, antidiabetic, and dyslipidemic prescription medication use among children and adolescents. Arch Pediatr Adolesc Med. 2009 Apr;163(4):357-64	C	Cross-sectional	Children	N=5.3 to 6 million	Multi race, both genders, multi-ethnic	Unknown	N/A	N/A	Prescription of anti-hypertensive medications	Unknown	1. Prevalence of anti-hypertensive agent prescription is 1.5/1000 youth. 2 Most frequently prescribed medication= beta-blocker. 3. Prevlance of prescribed anti-hypertensive medication increases with age (e.g,. 1.5/1000 at 12 to 15 years of age and 2.9/1000 at 16 to 19 years of age)	Knowledge of the prescription of anti-hypertensive medication	None reported	B>H	Potential bias: not prescribed anti-hypertensive medication receive these medications for hypertension. Commercially insure population.
N/A	14	added	Rodriguez BL, Dabelea D, Liese AD, Fujimoto W, Waitzfelder B, Liu L, Bell R, Talton J, Snively BM, Kershnar A, Urbina E, Daniels S, Imperatore G; SEARCH Study Group	N/A, 26	2.2, 8.2	2010	Prevalence and correlates of elevated blood pressure in youth with diabetes mellitus: the SEARCH for diabetes in youth study	J Pediatr	Rodriguez BL, Dabelea D, Liese AD, Fujimoto W, Waitzfelder B, Liu L, Bell R, Talton J, Snively BM, Kershnar A, Urbina E, Daniels S, Imperatore G; SEARCH Study Group.. Prevalence and correlates of elevated blood pressure in youth with diabetes mellitus: the SEARCH for diabetes in youth study. J Pediatr. 2010 Aug;157(2):245-251.e1	C	Cross-sectional	Children	N= 11 179	Children 3 to 17 years of age with Type 1/Type 2 diabetes mellitus; Multi race, both genders, multi-ethnic; Children; SEARCH database, multicenter database of nongestational diabetic youth < 20 years of age; Commercially insured US children and adolescents; N= 5.3 to 6million persons	4- mercury sphygmonometer	N/A	N/A	Prevalence of elevated blood pressure; prevalence of controlled blood pressure (BP <120/80 for children taking anti-hypertensive therapy)	Yes- 3 measurements	Prevalence of elevated BP in youth with type 1 diabetes mellitus was 5.9%; minority ethnic groups,obese adolescents, and youth with poor glycemic control were disproportionately affected. In contrast, 23.7% of adolescents with type 2 diabetes mellitus had elevated BP (P < 0.0001). Similarly, 31.9% of youth with type 2 diabetes mellitus and elevated BP were aware, compared with only 7.4% of youth …	Knowledge of prevalence of hypertension among children with DM	Unknown	B>H	Data are based on BP measurements taken at the same clinic visit and therefore may not fully reflect the true prevalence of hypertension. Potential selection bias. Potential bias related to incomplete visit participation.
N/A	15	added	Willi SM, Hirst K, Jago R, Buse J, Kaufman F, El Ghormli L, Bassin S, Elliot D, Hale DE; HEALTHY Study Group	N/A	2.2	2012	Cardiovascular risk factors in multi-ethnic middle school students: the HEALTHY primary prevention trial	Pediatr Obes	Willi SM, Hirst K, Jago R, Buse J, Kaufman F, El Ghormli L, Bassin S, Elliot D, Hale DE; HEALTHY Study Group.. Cardiovascular risk factors in multi-ethnic middle school students: the HEALTHY primary prevention trial. Pediatr Obes. 2012 Jun;7(3):230-9	B	Cluster randomized trial (primary unit= middle schools)	Children and adolescents	N=4363	Multi race, both genders, multi-ethnic; HEALTHY trial; 42 middle school. Baseline information obtained in 6th grade. Post intervention assessment in 8th grade.	1- Oscillometric	Lifestyle intervention: changes to school foods, physical education, educational outreach and behavior change (2.5 years)	No intervention group	Anthropometrics, blood pressure, fasting lipid panel	Yes- 3 measurements	1. BP higher in boys than girls, 9.1% boys, 8.9% girls. 2. Significant reduction in HTN and pre HTN in non Hispanic black and non Hispanic white youth	Identification of a potential interventions for elevated BP in youth	None reported	B>H	Selection bias: signfican number of potential participants refuxed.
PICOT4	16	75	DiPietro A, Kees-Folts D, DesHarnais S, Camacho F, Wassner SJ	N/A; 11	2.2, 5.1	2009	Primary hypertension at a single center: treatment, time to control, and extended follow-up	Pediatr Nephrol	DiPietro A, Kees-Folts D, DesHarnais S, Camacho F, Wassner SJ. Primary hypertension at a single center: treatment, time to control, and extended follow-up. Pediatr Nephrol. 2009 Dec;24(12):2421-8	C	Cohort study; single center (Penn State Hershey Children's Hospital)	Children and adolescents	N=65	Multi-race, both genders; 12-14 years of age	Unknown	Anti-hypetensive medications	N/A	BMI, weight, SBP, DBP, medication doses required to achieve BP control, time to BP control	Unknown	1. Only 37/65 (56%) were able to maintain BP control during follow-up. 2. ACEI (Enalapril 0.2mg/kg/day) and Beta blocker (3.7mg/kg/day) were the most successful medications for achieving BP control. 3. 50% of those with inadequate BP control was secondary to non compliance.	Knowledge regarding managemeent of hypertension in youth	None reported	B>H	Single center study.
PICOT3	17	164	Seeman T, Gilík J	N/A, 22	2.2, 7.3d	2013	Long-term control of ambulatory hypertension in children: improving with time but still not achieving new blood pressure goals	Am J Hypertens	Seeman T, Gilík J. Long-term control of ambulatory hypertension in children: improving with time but still not achieving new blood pressure goals. Am J Hypertens. 2013 Jul;26(7):939-45	C	Prospective cohort study	Children and adolescents	N=38	32/38 (84%) w/ CKD; Children with renovascular hypertension, treated with ramipril for mean duration of 0.3 years; 12-18 years of age	2-ABPM	Ramipril for 2.6 years (+ another agent in some cases)	N/A	ABPM assessment of BP control	Yes- ABPM	34% w/ adequate blood pressure control following treatment with ramipril	Knowledge of potential for BP control	None reported	B>H	Small sample. All White. No other races, ethnicitis studied.
PICOT3	18	39	Foglia CF, von Vigier RO, Fossali E, Salice P, Ghiglia S, Ardissino G, Pollini I, Bianchetti MG	N/A	2.2	2005	A simplified antihypertensive drug regimen does not ameliorate control of childhood hypertension	J Hum Hypertens	Foglia CF, von Vigier RO, Fossali E, Salice P, Ghiglia S, Ardissino G, Pollini I, Bianchetti MG. A simplified antihypertensive drug regimen does not ameliorate control of childhood hypertension. J Hum Hypertens. 2005 Aug;19(8):653-4	C	Retrospective cohort study (written up as a letter)	Children	N=100	Children with hypertension; N=50 in receipt of 'modern' (single dose antihypertensive therapy), N=50 in receipt of 'traditional' (multidose therapy)	Unknown	Modern versus traditional dosing	N/A	SBP or DBP <95th percentile	Unknown	No difference in % with BP control among modern verus traditionally treated children	Knowledge of any potentinal benefit of modern dosing (e.g., single daily dosing)	None reported	B>H	Small sample size. Non-US population.
N/A	20	added	Sorof JM, Lai D, Turner J, Poffenbarger T, Portman RJ	N/A	2.3a	2004	Overweight, ethnicity, and the prevalence of hypertension in school-aged children	Pediatrics	Sorof JM, Lai D, Turner J, Poffenbarger T, Portman RJ. Overweight, ethnicity, and the prevalence of hypertension in school-aged children. Pediatrics. 2004 Mar;113(3 Pt 1):475-82	C	Cross-sectional	Children	N= 5102	Overweight, obese; Multi-race , multi-ethnic; 13.5 +/- 1.7 years	(school based BP screening)	N/A	N/A	BP	Yest- at least 3 measurements	Increasing prevalence of obesity and hypertension, particularly among minority youth. However, prevalence of hypertension decreases with repeated measurement: 19.4% at the first visit, 9.5% at the second visit, and 4.5% at the third visit	Knowledge of the prevalence of hypertension	None reported	B>H	Loss to follow-up by the third (BP) screening.
N/A	21	added	Koebnick C, Black MH, Wu J, Martinez MP, Smith N, Kuizon B, Cuan D, Young DR, Lawrence JM, Jacobsen SJ	N/A	2.3a	2013	High blood pressure in overweight and obese youth: implications for screening	J Clin Hypertens	Koebnick C, Black MH, Wu J, Martinez MP, Smith N, Kuizon B, Cuan D, Young DR, Lawrence JM, Jacobsen SJ. High blood pressure in overweight and obese youth: implications for screening. J Clin Hypertens (Greenwich). 2013 Nov;15(11):793-805	C	Cross-sectional	Children	N=237,248	Children 6-17 years of age with hypertension (w/o growth hormon deficiency, aortic coarctation, chronic renal failure, congenital adrenal hyperplasia, Cushing syndrome, hyperaldosteronism, +/-hypothyroidism); Presence of hypertension defined as > 3 BPs + having filled a prescription for an antihypertensive agent or having had at least 1 outpatient diagnosis of HTN	1- Oscillometric	N/A	N/A	N/A	Yes- at least 3 measurements	1. Prevalence of prehypertension, 31.4%. 2. Prevalence of hypertension 2.1%. 3. Higher prevalence of hypertension among persons with a higher BMI category. 4. Extremely obese youth are 10 times more likely to have a high BP compared to normal weight children	More recent estimated of the prevalence of pre-hypertension and hypertenson.	Higher prevalence of high BP among persons with higher BMI.	B>H	Single insurance carrier. Potential selection bias. Oversampling of Hispanic population with 50% Hispanic.
N/A	22	added	Falkner B, Gidding SS, Ramirez-Garnica G, Wiltrout SA, West D, Rappaport EB	N/A	2.3a, 13.1	2006	The relationship of body mass index and blood pressure in primary care pediatric patients	J Pediatr	Falkner B, Gidding SS, Ramirez-Garnica G, Wiltrout SA, West D, Rappaport EB. The relationship of body mass index and blood pressure in primary care pediatric patients. J Pediatr. 2006 Feb;148(2):195-200	C	Cross-sectional	Children, adolescents and young adults	N=18,618	Nemours foundation. Children in Pediatric Practices within Delaware and SE Pennsylvania, 2 to 19 years of age	1, 4- <10% oscillometric, majority mercury sphyngomanometer	N/A	N/A	N/A	No- only 1 measurement	1. Increase in SBP and/or DBP with each increase in BMI and age group. 2. Association between higher BP and increased BMI was present in all age groups. 3. 7.2% with elevated BP after a single measurement. 4. BP higher in children with BMI >85th and <95th percentiles. Highest BP among children with BMI >95th percentile	Knowledge of relationship between BMI and elevated BP	Note: single BP measurement used to determine relationship	B=H	Detection bias. Potential for increased false positives with use of a single BP to define hypertension. Relationship in question is between an elevated BP and BMI.
N/A	23	added	Lurbe E, Invitti C, Torro I, Maronati A, Aguilar F, Sartorio A, Redon J, Parati G	6	2.3, 4.8, Table 12	2006	The impact of the degree of obesity on the discrepancies between office and ambulatory blood pressure values in youth	J Hypertens	Lurbe E, Invitti C, Torro I, Maronati A, Aguilar F, Sartorio A, Redon J, Parati G. The impact of the degree of obesity on the discrepancies between office and ambulatory blood pressure values in youth. J Hypertens. 2006 Aug;24(8):1557-64. Erratum in: J Hypertens. 2007 Jan;25(1):258	C	Cross-sectional	Children and adolescents	N=465	2 European centers: Spain and Italy. 11-18 year old. Caucasion only.	2- ABPM, 4-mercury sphyngomanometer	N/A	N/A	N/A	Yes- 3 measurements for all office measurements	Higher ABPM and in office BPs as weight status increases. Prevelence of office HTN: 0.6%, nonobese, 1.2% overweight, 5.2% moderately obese, 37.5% severely obese	Knowledge of prevalence of HTN (as well as daytime and nighttime BPs) by weight status	Higher prevalence HTN with increasing BMI	B>H	Lack of racial and ethnic diversity in study population.
N/A	24	added	Skinner AC, Perrin EM, Moss LA, Skelton JA	N/A	2.3	2015	Cardiometabolic Risks and Severity of Obesity in Children and Young Adults	N Engl J Med	Skinner AC, Perrin EM, Moss LA, Skelton JA. Cardiometabolic Risks and Severity of Obesity in Children and Young Adults. N Engl J Med. 2015 Oct;373(14):1307-17	C	Cross-sectional	Children and adolescents	N= 8579	NHANES, 1999-2012	4- mercury sphyngomanometer	N/A	N/A	N/A	No	Severe obesity in children and young adults is associated with increased risk for cardiometabolic risk factors (multivariate analysis). 46.9% oveweight, 36.4% w/ class 1 obesity, 11.9% w/ class 2 obesity, 4.8% w/ class 3 obesity	Knowedge of the prevalence of CVD risk factors among children	No reported harm	B>H	Up to 3 measurements during a single session only.
N/A	25	added	Zhang T, Zhang H, Li S, Li Y, Liu Y, Fernandez C, Harville E, Bazzano L, He J, Chen W	N/A	2.3a	2016	Impact of Adiposity on Incident Hypertension Is Modified by Insulin Resistance in Adults: Longitudinal Observation From the Bogalusa Heart Study	Hypertension	Zhang T, Zhang H, Li S, Li Y, Liu Y, Fernandez C, Harville E, Bazzano L, He J, Chen W. Impact of Adiposity on Incident Hypertension Is Modified by Insulin Resistance in Adults: Longitudinal Observation From the Bogalusa Heart Study. Hypertension. 2016 Jan;67(1):56-62	B	Retrospecitve cohort study	Adults	N=1621	Bogalusa study patients. Middle aged, normotensive (at baseline).	4- mercury sphyngomanometer	N/A	N/A	HOMA, BP	Yes- 3 per trained observor (2 observors per visit)	Higher prevalence of incident HTN in the insulin resistent versus insulin sensitive adopsity group (32% versus 22%, p<0.001)	Knowledge of the relationship between adiposity, insulin resistance and HTN	Study limited to adult patients.	B>H	Unclear how this data applies to the pediatric population.
N/A	26	added	So HK, Yip GW, Choi KC, Li AM, Leung LC, Wong SN, Sung RY; Hong Kong ABP Working Group	N/A	2.3a, 4.8	2016	Association between waist circumference and childhood-masked hypertension: A community-based study	J Paediatr Child Health	So HK, Yip GW, Choi KC, Li AM, Leung LC, Wong SN, Sung RY; Hong Kong ABP Working Group.. Association between waist circumference and childhood-masked hypertension: A community-based study. J Paediatr Child Health. 2016 Apr;52(4):385-90	C	Cross-sectional	Children and adolescents	N= 1385	Hong Kong; patients selected based upon 2 stage cluster sampling: schools and then individuals students (selected by computer generated number); 8 -17 years of age	ABPM, validated oscillometric BP	N/A	N/A	Anthropometric data, casual BP, ABPM	No for casual BP (only 2 measurements)	While it is known that waist circumference (WC) and body mass index (BMI) are independently associated with casual blood pressure (BP) in adolescents; WC may be more clinically useful than BMI in predicting risk of developing hypertension in non-obese children; 3 WC is a useful screening tool for abdominal obesity and predicts insulin resistance in children and adolescents. New findings: Children…	Knowledge of association between waiste circumference and masked HTN	Non US population	B>H	Non-US population. Lack of racial and ethnic diversity.
N/A	29	added	Török K, Pálfi A, Szelényi Z, Molnár	N/A	2.3a, 4.8	2008	Circadian variability of blood pressure in obese children	Nutr Metab Cardiovasc Dis	Török K, Pálfi A, Szelényi Z, Molnár D. Circadian variability of blood pressure in obese children. Nutr Metab Cardiovasc Dis. 2008 Jul;18(6):429-35	C	Cross-sectional	Children and adolescents	N= 73	Hungarian children, outpatient obesity clinic; mean age 14.2 (+/- 2.3 years)	2- ABPM, 4- mercury sphyngomonometer	N/A	N/A	Exercise testing, ABPM, insulin, lipid level, blood glucose	Yes- 3 measurements	Normal circadian variation in BP is frequently absent in obese children. 42% of obese children are non dippers	Knowledge of impact of weight status on circadian variation in BP	none reported	B>H	Non-US population. Lack of racial and ethnic diversity.
N/A	30	added	Framme J, Dangardt F, Mårild S, Osika W, Währborg P, Friberg P	N/A	2.3a	2006	24-h Systolic blood pressure and heart rate recordings in lean and obese adolescents	Clin Physiol Funct Imaging	Framme J, Dangardt F, Mårild S, Osika W, Währborg P, Friberg P. 24-h Systolic blood pressure and heart rate recordings in lean and obese adolescents. Clin Physiol Funct Imaging. 2006 Jul;26(4):235-9	C	Cross-sectional	Children and adolescents	N= 80	Swedish children; single center; outpatient clinic; 10 to 18 years of age	ABPM	N/A	N/A	Anthropometric and ABPM	N/A	SBP nocturnal dipping response is less pronounced in obese versus lean children	Knowledge of impact of BMI on nocturnal dipping in children	none reported	B>H	Non-US population; Lack of racial and ethnic diversity.
N/A	31	added	Westerståhl M, Marcus C	N/A	2.3a	2010	Association between nocturnal blood pressure dipping and insulin metabolism in obese adolescents	Int J Obes	Westerståhl M, Marcus C. Association between nocturnal blood pressure dipping and insulin metabolism in obese adolescents. Int J Obes (Lond). 2010 Mar;34(3):472-7	B	Retropsective Cohort Study	Children	N=282	Swedish children; mean age 15.4 years	ABPM	N/A	N/A	ABPM values	N/A	Negative association between nocturnal BP fall (dipping) and measures of insulin metabolism independent of the degree of obesity or daytime BP level among severely obese, non-diabetic adolescents without diagnosed hypertension	Knowledge of impact of BMI on nocturnal dipping in children	none reported	B>H	Non-US population; Lack of racial and ethnic diversity.
N/A	32	added	Westerståhl M, Hedvall Kallerman P, Hagman E, Ek AE, Rössner SM, Marcus C	N/A	2.3a	2014	Nocturnal blood pressure non-dipping is prevalent in severely obese, prepubertal and early pubertal children	Acta Paediatr	Westerståhl M, Hedvall Kallerman P, Hagman E, Ek AE, Rössner SM, Marcus C. Nocturnal blood pressure non-dipping is prevalent in severely obese, prepubertal and early pubertal children. Acta Paediatr. 2014 Feb;103(2):225-30	C	Restrospective cohort study	Children	N=76	Swedish children; 5 to 13 years of age	ABPM	N/A	N/A	ABPM values	N/A	42% of obese children are SBP non dippers; 17% of obese children are DBP non dippers; No relationship between SBP or DBP non dipping and measures of insulin resistance	Knowledge of any potential relationship between insulin resistance and nondipping in obese children	none reported	B>H	Non-US population; Lack of racial and ethnic diversity.
N/A	33	added	Macumber IR, Weiss NS, Halbach SM, Hanevold CD, Flynn JT	N/A	2.3a, 4.8	2016	The Association of Pediatric Obesity With Nocturnal Non-Dipping on 24-Hour Ambulatory Blood Pressure Monitoring. Am J Hypertens	Am J Hypertens	Macumber IR, Weiss NS, Halbach SM, Hanevold CD, Flynn JT. The Association of Pediatric Obesity With Nocturnal Non-Dipping on 24-Hour Ambulatory Blood PressureMonitoring. Am J Hypertens. 2016 May;29(5):647-52	C	Cross-sectional	Children	N=408	Children and young adults, 5-21 years of age; Single center's Seattle Childrens. Persons who had undergone ABPM between 2008 and 2014	ABPM	N/A	N/A	ABPM values	N/A	34% of obese children were non dippers versus 13.6% lean children	Knowledge of impact of BMI on nocturnal dipping in children	none reported	B>H
N/A	34	added	Perng W, Rifas-Shiman SL, Kramer MS, Haugaard LK, Oken E, Gillman MW, Belfort MB	N/A	2.3a	2016	Early Weight Gain, Linear Growth, and Mid-Childhood Blood Pressure: A Prospective Study in Project Viv	Hypertension	Perng W, Rifas-Shiman SL, Kramer MS, Haugaard LK, Oken E, Gillman MW, Belfort MB. Early Weight Gain, Linear Growth, and Mid-Childhood Blood Pressure: A Prospective Study in Project Viva. Hypertension. 2016 Feb;67(2):301-8	C	Cross-sectional	Children	N= 957	Children participating in PROJECT VIVA, Boston area project; pre-birth enrollment; children 6-10 years of age	1- oscillometric	N/A	N/A	Mid child BP, perinatal characteristics, maternal exposure (smoking), maternal factors (pre pregnancy BMI)	Yes- 5 measurements* (but oscillometric only)	Maternal pre-pregnancy BMI and smoking during pregnancy were associated with higher offspring SBP and DBP. Children of mothers with chronic HTN and gestational HTN had 6.52mmHg and 2.61mmHg higher BP. Each increment in BMI Z-score gain during 1st 6 post natal months and during 2-3 years of age were associated with a 0.7 and a 1.5mmHg higher mid chiildhood BP. No evidence of an interaction between…	Knowedge of prenatal exposures and mid childhood BP	none reported	B>H
N/A	35	added	Parker ED, Sinaiko AR, Kharbanda EO, Margolis KL, Daley MF, Trower NK, Sherwood NE, Greenspan LC, Lo JC, Magid DJ, O'Connor PJ	N/A	2.3a	2016	Change in Weight Status and Development of Hypertension	Pediatrics	Parker ED, Sinaiko AR, Kharbanda EO, Margolis KL, Daley MF, Trower NK, Sherwood NE, Greenspan LC, Lo JC, Magid DJ, O'Connor PJ. Change in Weight Status and Development of Hypertension. Pediatrics. 2016 Mar;137(3):e20151662	B	Retrospective Cohort Study	Children	N= 101,606	Children in the Kaiser network; 3 to 11 years of age	1 or 4-manual	N/A	N/A	BP	No- 1 measurement	Largest % increase in BP %ile is among children and adolescentswho became obese or who maintained obesity. Obesity HR 2.02 (CI: 1.28 to 7.04) if obese and between 3 and 11 years of age	Further information regarding impact of BMI on development of HTN in children	none reported	B>H	Single insurrance carrier.
N/A	36	added	Yip J, Facchini FS, Reaven GM	N/A	2.3a	1998	Resistance to insulin-mediated glucose disposal as a predictor of cardiovascular disease	J Clin Endocrinol Metab	Yip J, Facchini FS, Reaven GM. Resistance to insulin-mediated glucose disposal as a predictor of cardiovascular disease. J Clin Endocrinol Metab. 1998 Aug;83(8):2773-6	B	Prospective cohort study	Adults	N= 1470	All healthy subjects recruited for metabolic studies at the Stanford GCRC	Unknown	N/A	N/A	CVD event	Unknown	Approximately one of every five healthy, nonobese subjects in the most insulin-resistant tertile, followed for approximately 5 yr, had a serious clinical event	Knowledge of the relationship between insulin resistance and a CVD related event	Insulin resistance is associated with CVD	B>H	Adults only.
N/A	38	added	Lurbe E, Torro I, Aguilar F, Alvarez J, Alcon J, Pascual JM, Redon J	N/A	2.3a	2008	Added impact of obesity and insulin resistance in nocturnal blood pressure elevation in children and adolescents	Hypertension	Lurbe E, Torro I, Aguilar F, Alvarez J, Alcon J, Pascual JM, Redon J. Added impact of obesity and insulin resistance in nocturnal blood pressure elevation in children and adolescents. Hypertension. 2008 Mar;51(3):635-41	C	Cross-sectional	Children	N=87	Children in Valencia Spain, single center, obese children	ABPM or 4-mercury sphyngomanometer	N/A	N/A	BP	Office: Yes- 3 measurements	Increased noctural BP was associated with HOMA (marker of insulin resistance) in obese/overweight children	Knowledge of any potential relationship between insulin resistance and nondipping in obese children	none reported	B>H	Non-US population; Lack of racial and ethnic diversity.
N/A	39	added	Chinali M, de Simone G, Roman MJ, Best LG, Lee ET, Russell M, Howard BV, Devereux RB	N/A	2.3a	2008	Cardiac markers of pre-clinical disease in adolescents with the metabolic syndrome: the strong heart study	J Am Coll Cardiol	Chinali M, de Simone G, Roman MJ, Best LG, Lee ET, Russell M, Howard BV,Devereux RB. Cardiac markers of pre-clinical disease in adolescents with the metabolic syndrome: the strong heart study. J Am Coll Cardiol. 2008 Sep 9;52(11):932-8	C	Cross-sectional	Adolescents	N=446	American indian adolescents, participants of the Strong Heart Study	Not fully described (states, as recommended by JNC5)	N/A	N/A	BP, ECG, Echo (LVH: males LVMI (jt^2.7) > 40.75g/m2.7 and females >38.45g/m2.7. LAE. Lipid levels.	Unknown	Adolescents with MetS exhibit increased AoR dilation, LAE and a trend toward concentric LV geometry and increased prevalence of LVH. 2.3fold increased risk of LA dilatin in persons with MetS	Knowledge of CV impact of MetS in adolescents	none reported	B>H	Solely American Indian population. Lack of racial and ethnic diversity.
N/A	40	added	Archbold KH, Vasquez MM, Goodwin JL, Quan SF	N/A	2.3b	2012	Effects of sleep patterns and obesity on increases in blood pressure in a 5-year period: report from the Tucson Children's Assessment of Sleep Apnea Study	J Pediatr	Archbold KH, Vasquez MM, Goodwin JL, Quan SF. Effects of sleep patterns and obesity on increases in blood pressure in a 5-year period: report from the Tucson Children's Assessment of Sleep Apnea Study. J Pediatr. 2012 Jul;161(1):26-30	B	Prospective cohort study	Children	N=334	Hispanic and Caucasion children, only; Children 6 to 11 years of age (Tucson School District)	4- mercury sphygmomanometer	Home polysomnography; neurocognitive assessment	N/A	N/A	Yes- 3 measurements	Increases in BMI and reductions in total sleep time are associated with higher levels of blood pressure in adolescents.	Early recognition of hypertension in children with sleep disordered breathing (SDB)	N/A	B>H	Lack of racial and ethnic groups other than Hispanic and Caucasian.
N/A	41	added	Javaheri S, Storfer-Isser A, Rosen CL, Redline S	N/A	2.3b	2008	Sleep quality and elevated blood pressure in adolescents. Circulation	Circulation	Javaheri S, Storfer-Isser A, Rosen CL and Redline S. Sleep quality and elevated blood pressure in adolescents. Circulation. 2008;118:1034-40	C	Cross-sectional	Children	N=238	Children participating in the Cleveland Children's Sleep and Health study (longitudinal cohort study), 13 to 16 years of age; 45% Caucasian; Excluded children with sleep disorders (e.g, children with OSA) and significant co-morbidities	4- mercury sphygmomanometer	5 to 7 days of wrist actigraphy	N/A	Actigraphy,	Yes- 3 measurements	3.5-fold odds of pre-hypertension or hypertension in children with low sleep efficiency. Low sleep efficiency was associated with an average adjusted increase in systolic BP of 4 mmHg. Short sleep duration was associated with a 2.5-fold increased odds of pre-hypertension, an association partly attributable to low sleep efficiency.	Early recognition of hypertension in children with low sleep efficiency	N/A	B>H	Observational study. Causality cannot be determined.
PICOT1	42	110	Hartzell K, Avis K, Lozano D, Feig D	N/A	2.3b	2015	Obstructive sleep apnea and periodic limb movement disorder in a population of children with hypertension and/or nocturnal nondipping blood pressures.	J Am Soc Hypertens	Hartzell K, Avis K, Lozano D, Feig D. Obstructive sleep apnea and periodic limb movement disorder in a population of children with hypertension and/or nocturnal nondipping blood pressures. J Am Soc Hypertens. 2016 Feb;10(2):101-7.	B/ JD - C	Restrospective chart review	Children	N=54	Children with sleep disordered breathing (single center)	2	N/A	N/A	apnea hypoxia index (AHI)	N/A- ABPM	54% (18/33) of hypertensive children had OSA (AHI > 1) compared to 40% prevalence of OSA among normotensive children	N/A	N/A	B>H	Retrospective chart review, ABPM group may have been biased, Comparison group not standard (all referred for sleep study). Data limited to only those children who had undergone ABPM and polysomnography.
PICOT2/PICOT3	43	10	Au CT, Ho CK, Wing YK, Lam HS, Li AM	N/A	2.3b, Table 12	2014	Acute and chronic effects of sleep duration on blood pressure	Pediatrics	Au CT, Ho CK, Wing YK, Lam HS, Li AM. Acute and chronic effects of sleep duration on blood pressure. Pediatrics. 2014 Jan;133(1):e64-72.	C/C (DK)	Cross-sectional	Children	N= 143	Normal weight children without known OSA; 10 to 18 years of age	2-ABPM	N/A	N/A	Overnight polysomnography (obstructive apnea hypopnea index <5) for 9.5hours followed by 24hour ABPM monitoring	N/A-ABPM	Average of 1 hour of reduced sleep duration associated with increase of 2mmHg SBP and an increase of 1mmHg	Mild improvements in blood pressure with longer sleep duration		Benefits of questioning sleep duration may exceed the harm	Avoided obese patients (a potential confounder).
PICOT2	44	5	Li AM, Au CT, Ng C, Lam HS, Ho CK, Wing YK	N/A	2.3b, 9.2	2014	A 4-year prospective follow-up study of childhood OSA and its association with BP	Chest	Li AM, Au CT, Ng C, Lam HS, Ho CK, Wing YK. A 4-year prospective follow-up study of childhood OSA and its association with BP. Chest. 2014 Jun;145(6):1255-1263.	C/C (DK)	Prospective- Cohort (4 years)	Children	N= 306	Chinese children: children w/ OSA (mild, moderate/severe), Normal/No OSA group; Primary (children with cardiac disease excluded but no mention of exclusion of children with renal or other forms of secondary hypertension)	2- ABPM	N/A	N/A	Wake SBP, wake DBP, Sleep SBP, sleep DBP	N/A-ABPM	Among normal weight children, there was an increase in wake SBP based upon degree of OSA at baseline (i.e, higher BP among children with with OAHI >5 compared to among children with OAHI of 1 or less. Among normal weight children, there was in increase in sleeping SBP at baseline by OSA severity and over the 4 year follow-up period. There was however no difference in BP at baseline or during foll…	Assessment of other potential contributors to BP among children (especially normotensive).	Over-extrapolation of the data could lead potentiallly to interventions that are not indicated.	B>H	Small sample study. Population may be different.
PICOT2	45	21	Li AM, Au CT, Sung RY, Ho C, Ng PC, Fok TF, Wing YK	N/A	2.3b, 9.2	2008	Ambulatory blood pressure in children with obstructive sleep apnoea: a community based study	Thorax	Li AM, Au CT, Sung RY, Ho C, Ng PC, Fok TF, Wing YK. Ambulatory blood pressure in children with obstructive sleep apnoea: a community based study. Thorax. 2008 Sep;63(9):803-9.	C	Prospective cohort study	Children and adolscents	N=306	Chinese children; no alternative races or ethnicities included; 6-13 years; High or low risk for OSA using validated screening questionnaire	2- ABPM (Space labs) - abbreviated study as shortened daytime assessement_x000D_ Polysomnography (standard overninght)	N/A	Healthy contol (AHI < 1 and history of snoring < 3 night per week) [n=127]_x000D_ versus _x000D_ Mild OSA (AHI 1-5) [n=133]_x000D_ Mod-Severe OSA (AHI>5) [n=46]	ABPM values (mean and SDS)_x000D_ Number with HTN	N/A- ABPM	Children with OSA had higher BP than controls during both sleep and wakefulness; BP levels increase with increasing severity of OSA	Using the OSA questionnaire children at higher risk for HTN (by ABPM) can be identified	None reported	B>H	Low compliance with 24-hour BP recording.
N/A	46	added	Flynn JT, Mitsnefes M, Pierce C, Cole SR, Parekh RS, Furth SL, Warady BA; Chronic Kidney Disease in Children Study Group	2	2.3c, 4.2, Table 12	2008	Blood Pressure in Children With Chronic Kidney Disease A Report From the Chronic Kidney Disease in Children Study	Hypertension	Flynn JT, Mitsnefes M, Pierce C, Cole SR, Parekh RS, Furth SL, Warady BA; Chronic Kidney Disease in Children Study Group.. Blood pressure in children with chronic kidney disease: a report from the Chronic Kidney Disease in Children study. Hypertension. 2008 Oct;52(4):631-	C	Cross-sectional	Children	N=432	CKiD Study participants; children with chronic kidney disease; mean age 11 years	Aneroid sphyngomanometer	N/A	N/A	BP	Office: Yes- 3 measurements	1. 14% with SHTN, 11% with pre SHTN, 14% with DHTN, 9% w/ pre DHTN. HTN associated with black race, shorter duration of CKD, absence of antiHTN medication use, increased serum K, uncontrolled BP onmeds associated with male, shorter CK duration and absence of ARB or ACEi use	Knowledge of distribution of BP, prevalence of risk factors for HTN in pediatric CKD patients	none reported	B>H
N/A	47	added	Samuels J, Ng D, Flynn JT, Mitsnefes M, Poffenbarger T, Warady BA, Furth S	7, 23, 24	2.3c, 4.7a, 8.1a, 8.1b	2012	Ambulatory Blood Pressure Patterns in Children With Chronic Kidney Disease	Hypertension	Samuels J, Ng D, Flynn JT, Mitsnefes M, Poffenbarger T, Warady BA, Furth S; Chronic Kidney Disease in Children Study Group.. Ambulatory blood pressure patterns in children with chronic kidney disease. Hypertension. 2012 Jul;60(1):43-50	C	Cross-sectional	Children	N=332	CKiD Study participants; children with chronic kidney disease; mean age 12 years (range: 1 to 16 years of age)	2-ABPM	N/A	N/A	ABPM values	N/A	50% of the subjects had a normal ABPM. BP load was elevated (>25%) in 52% (n= 172) while mean BP was elevated in 32% (n= 105). In multivariate analysis, those using an ACE inhibitor (ACEi) were 89% more likely to have a normal ABPM than those who did not report using an ACEi (OR: 1.89, 95%CI: 1.17, 3.04). For every 20% faster decline in annualized GFR change, the odds of an abnormal ABPM increase…	Knowledge of distribution of BP, prevalence of risk factors for HTN in pediatric CKD patients	none reported	B>H
N/A	49	added	Chavers BM, Solid CA, Daniels FX, Chen SC, Collins AJ, Frankenfield DL, Herzog CA	N/A	2.3c	2009	Hypertension in pediatric long-term hemodialysis patients in the United States	Clin J Am Soc Nephrol	Chavers BM, Solid CA, Daniels FX, Chen SC, Collins AJ, Frankenfield DL, Herzog CA. Hypertension in pediatric long-term hemodialysis patients in the United States. Clin J Am Soc Nephrol. 2009 Aug;4(8):1363-9	C	Cross-sectional	Children	N=624	0 to 18 year olds; end-stage renal disease (ESRD) Clinical Performance Measures (CPM) Project is a national quality assurance program led by the Centers for Medicare & Medicaid Services (CMS) and the 18 ESRD Networks	1- oscillometric	N/A	N/A	BP measurements	Yes- 3 measurements	75% with hypertension; Hypertension is common in U.S. pediatric long-term hemodialysis patients, uncontrolled in 74% of treated patients, and untreated in 21% of hypertensive patients	Knowledge of distribution of BP, prevalence of risk factors for HTN in pediatric dialysis patients	none reported	B>H
N/A	51	added	Tkaczyk M, Nowicki M, Bałasz-Chmielewska I, Boguszewska-Baçzkowska H, Drozdz D, Kołłataj B, Jarmoliński T, Jobs K, Kiliś-Pstrusińska K, Leszczyńska B, Makulska I, Runowski D, Stankiewicz R, Szczepańska M, Wierciński R, Grenda R, Kanik A, Pietrzyk JA, Roszkowska-Blaim M, Szprynger K, Zachwieja J, Zajaczkowska MM, Zoch-Zwierz W, Zwolińska D, Zurowska A	N/A	2.3c	2006	Hypertension in dialysed children:the prevalence and therapeutic approach in Poland--a nationwide survey	Nephrol Dial Transplant	Tkaczyk M, Nowicki M, Bałasz-Chmielewska I, Boguszewska-Baçzkowska H, Drozdz D, Kołłataj B, Jarmoliński T, Jobs K, Kiliś-Pstrusińska K, Leszczyńska B, Makulska I, Runowski D, Stankiewicz R, Szczepańska M, Wierciński R, Grenda R, Kanik A, Pietrzyk JA, Roszkowska-Blaim M, Szprynger K, Zachwieja J, Zajaczkowska MM, Zoch-Zwierz W, Zwolińska D, Zurowska A. Hypertension in dialysed children: the preval…	C	Cross-sectional	Children	N=134	Polish children in receipt of dialayis for at least months; mean age 10.7+/-5 years	4	N/A	N/A	BP measurements	Yes- 3 measurements	55%with hypertension	Knowledge of distribution of BP, prevalence of risk factors for HTN in pediatric dialysis patients	none reported	B>H	Non-US population; Lack of racial and ethnic diversity.
N/A	52	added	Kramer AM, van Stralen KJ, Jager KJ, Schaefer F, Verrina E, Seeman T, Lewis MA, Boehm M, Simonetti GD, Novljan G, Groothoff JW	N/A	2.3c	2011	Demographics of blood pressure and hypertension in children on renal replacement therapy in Europe	Kidney Int	Kramer AM, van Stralen KJ, Jager KJ, Schaefer F, Verrina E, Seeman T, Lewis MA, Boehm M, Simonetti GD, Novljan G, Groothoff JW. Demographics of blood pressure and hypertension in children on renal replacement therapy in Europe. Kidney Int. 2011 Nov;80(10):1092-8	C	Cross-sectional	Children	N=3785	European Society for Pediatric Nephrology and the European Renal Association and European Dialysis and Transplant Association registry; 0 to 17 years	Unknown	N/A	N/A	BP measurements	Unknown	Blood pressure values above the 95th percentile were significantly more prevalent in very young patients (under 3 years) compared to 13- to 17-year olds (odds ratio 2.47), during the first year compared to over 5 years of renal replacement therapy (odds ratio 1.80), and in patients on hemodialysis compared to transplant recipients or those on peritoneal dialysis (odds ratios of 2.48 and 1.59, res…	Knowledge of BP in renal replacement recipients.	none reported	B>H
N/A	53	added	Halbach SM, Martz K, Mattoo T, Flynn J	N/A	2.3c	2012	Predictors of blood pressure and its control in pediatric patients receiving dialysis	J Pediatr	Halbach SM, Martz K, Mattoo T, Flynn J. Predictors of blood pressure and its control in pediatric patients receiving dialysis. J Pediatr. 2012 Apr;160(4):621-625	C	Cross-sectional	Children, adolescents, and young adults	N=3447	North American Pediatric Renal Trials and Collaborative Studies (NAPRTCS) registry; age 1-21 years of age	Unknown	N/A	N/A	BP measurements	No- single blood pressure	At 6 months after dialysis initiation, 67.9% of patients had uncontrolled or untreated hypertension, and 57.8% were prescribed antihypertensive medications. More recent year of dialysis initiation was associated with a higher use of antihypertensive medication and lower systolic BP and diastolic BP z scores (P < .001) measured over time from 6 months to 3 years post dialysis initiation. Other fac…	Knowledge of distribution of BP, prevalence of risk factors for HTN in pediatric dialysis patients	none reported	B>H
N/A	57	added	Mhanna MJ, Iqbal AM, Kaelber DC	N/A	2.3d	2015	Weight gain and hypertension at three years of age and older in extremely low birth weight infants.	J Neonatal Perinatal Med	Mhanna MJ, Iqbal AM, Kaelber DC. Weight gain and hypertension at three years of age and older in extremely low birth weight infants. J Neonatal Perinatal Med. 2015;8(4):363-9	B	Retrospective cohort	Children	N=204	ELBW infants born and followed up at a single institution over 15 years.	Unknown * no access	N/A	N/A	BP measurements	Unknown * no access	Obesity is prevalent in ELBW infants at three years of age and older, and it is significantly associated with hypertension. An increase in BMI percentile at ≥3 years of age, and the rate of weight gain since birth among ELBW infants are associated with an increase in SBP	Knowledge of HTN and obesity risks in children born ELBW	none reported	B>H	Single center.
PICOT2	58	120	Di Salvo G, Castaldi B, Baldini L, Gala S, del Gaizo F, D'Andrea A, Limongelli G, D'Aiello AF, Scognamiglio G, Sarubbi B, Pacileo G, Russo MG, Calabrò R	N/A	2.3d, 5.3, Table 12	2011	Masked hypertension (MH) in young patients after successful aortic coarctation repair: impact on left ventricular geometry and function	Journal of human hypertension	Di Salvo G, Castaldi B, Baldini L, Gala S, del Gaizo F, D'Andrea A, Limongelli G, D'Aiello AF, Scognamiglio G, Sarubbi B, Pacileo G, Russo MG, Calabrò R. Masked hypertension in young patients after successful aortic coarctation repair: impact on left ventricular geometry and function. J Hum Hypertens. 2011 Dec;25(12):739-45.	C/C	Cross-sectional	Children, adolescents and young adults	N=74	Aortic coarctation (repaired)- exluding patients with daytime hypertension by ABPM or manual BP assessment; also excluding children on anti-hypertensive therapy; 6-20 year-olds	N/A	N/A	N/A	LV geometry and function	Yes	Children with masked hypertension by ABPM have increased LV mass, abnormal diastolic function, and torsioal deformation of the left ventricle.	Benefit of diagnosing MH in children with a history of aortic coarctation repair.	None	B>H	Study design; single Cross-sectional study and limited sample size.
N/A	59	added	Bayrakci US, Schaefer F, Duzova A, Yigit S, Bakkaloglu A. Abnormal circadian blood pressure regulation in children born preterm	N/A	2.3d	2007	Abnormal circadian blood pressure regulation in children born preterm	J Pediatr	Bayrakci US, Schaefer F, Duzova A, Yigit S, Bakkaloglu A. Abnormal circadian blood pressure regulation in children born preterm. J Pediatr. 2007 Oct;151(4):399-403	B	Case-control study	Children	N=68 (N=41, preterm, N=27 control)	Children with a history of premature birth; 5 to 17 years of age	2-ABPM	N/A	Children not born prematurely	ABPM values	N/A	BP did not differ between the preterm group and control subjects during the daytime. However, nocturnal standardized systolic BP was elevated (P < .05) and a lack of nocturnal decrease was more prevalent in the preterm children compared with the control subjects (73% versus 41%, P .01).	Knowledge of impact of premature birth on BP	none reported	B>H	German population. Lack of racial and ethnic diversity.
N/A	60	added	Sun SS, Grave GD, Siervogel RM, Pickoff AA, Arslanian SS, Daniels SR	1	2.4, 4.2, 13.1	2007	Systolic blood pressure in childhood predicts hypertension and metabolic syndrome later in life	Pediatrics	Sun SS, Grave GD, Siervogel RM, Pickoff AA, Arslanian SS, Daniels SR. Systolic blood pressure in childhood predicts hypertension and metabolic syndrome later in life. Pediatrics. 2007 Feb;119(2):237-46	C	2 study design: Part 1, retrospective cohort study; Part 2, validation study	Adults	Part I: N=149 subjects (average age of 59-60 years of age); Part 2: N=493 subjects	Fels Longtudinal Study; Adults greater than or equal to 20 years of age at time of study analysis	4- Mercury sphyngomanometer for the adults; unknown how BPs were serially measured in children	N/A	Controls: persons without metabolic syndrome in adulthood	Diagnosis of HTN and metabolic syndrome in adulthood	3 for adult measurements; No for childhood measurements. Diagnosis of HTN based upon BP measured at a single visit.	Earliest significant difference in SBP between adults with and without metabolic syndome occurred at 5 years of age for boys and at 8 years of age for girls. Factors assocciated with greater odds of metabolic syndrome and HTN in adulthood: males with elevated SBP by age 5 years, girls with SBP that exceeded determined cutoff values by age 8 years and advanced bone age. Data suggests that for chil…	Greater information regarding the potential impact of early childhood risk factors on the development of metabolic syndrome and hypertension in adulthood. Recognition that identification of hypertension as a risk factor for metabolic syndrome and hypertension in adulthood needs to begin early in life (e.g, as early as age 5 years).	N/A	B>H	Small sample size; diversity of population not known.
N/A	61	added	Juhola J, Oikonen M, Magnussen CG, Mikkilä V, Siitonen N, Jokinen E, Laitinen T, Würtz P, Gidding SS, Taittonen L, Seppälä I, Jula A, Kähönen M, Hutri-Kähönen N, Lehtimäki T, Viikari JS, Juonala M, Raitakari OT	N/A	2.4	2012	Childhood physical, environmental, and genetic predictors of adult hypertension: the cardiovascular risk in young Finns study	Circulation	Juhola J, Oikonen M, Magnussen CG, Mikkilä V, Siitonen N, Jokinen E, Laitinen T, Würtz P, Gidding SS, Taittonen L, Seppälä I, Jula A, Kähönen M, Hutri-Kähönen N, Lehtimäki T, Viikari JS, Juonala M, Raitakari OT. Childhood physical, environmental, and genetic predictors of adult hypertension: the cardiovascular risk in young Finns study. Circulation. 2012 Jul 24;126(4):402-9	C	Prospective cohort study	Children and adolescents	N=2625	Finish population; Children followed longitudinally into adulthood, Cardiovascular Risk in Young Finns Study; age 3 to 18 years; followed up to 21-27 years of age	4- mercury sphygmonometer	N/A	N/A	Diagnosis of HTN in adulthood (SBP > 130mmHg and/or DBP >85mmHg)	Yes- 3 measurements	Predictors of adult hypertension: parental HTN (OR 1.86, 1.42-32.43), childhood SBP (OR 1.65, 1.48-1.83), genetic risk score (OR 1.30, 1.18- 1.44), childhood obesity or overweight (OR 1.65, 1.16-2.34)	Identification of early predictors of hypertension in adulthood	Finish population, may not reflect US population	B>H	Diveristy lacking.
N/A	62	added	Juhola J, Magnussen CG, Viikari JS, Kähönen M, Hutri-Kähönen N, Jula A, Lehtimäki T, Åkerblom HK, Pietikäinen M, Laitinen T, Jokinen E, Taittonen L, Raitakari OT, Juonala M	N/A	2.4	2011	Tracking of serum lipid levels, blood pressure, and body mass index from childhood to adulthood: the Cardiovascular Risk in Young Finns Study. J Pediatr	J Pediatr	Juhola J, Magnussen CG, Viikari JS, Kähönen M, Hutri-Kähönen N, Jula A, Lehtimäki T, Åkerblom HK, Pietikäinen M, Laitinen T, Jokinen E, Taittonen L, Raitakari OT, Juonala M. Tracking of serum lipid levels, blood pressure, and body mass index from childhood to adulthood: the Cardiovascular Risk in Young Finns Study. J Pediatr. 2011 Oct;159(4):584-90	C	Prospective cohort study	Children and adolescents	N=4320	Finish population; Children followed longitudinally into adulthood, Cardiovascular Risk in Young Finns Study; 3 to 18 years	4- mercury sphygmonometer	N/A	N/A	Diagnosis of HTN in adulthood (SBP > 140mmHg and/or DBP >90mmHg); dyslipidemia in adulthood	Yes- 3 measurements	Predictors of abnormal CVD risk factors in adulthood: childhood overweight/obesity, OR 5.1,; High TC, OR 2.3; high LDL, OR 3.1; low HDL, OR 3.6; high TG, OR 1.4; pre-HTN/HTN, OR 2.4	Identification of early predictors of hypertension and dyslipidemia (risk factors for premature cardiovascular disease) in adulthood	Finish population, may not reflect US population	B>H	Diveristy lacking.
N/A	63	added	Bao W, Threefoot SA, Srinivasan SR, Berenson GS	N/A	2.4, 13.1	1995	Essential hypertension predicted by tracking of elevated blood pressure from childhood to adulthood: the Bogalusa Heart Study	American journal of hypertension	Bao W, Threefoot SA, Srinivasan SR, Berenson GS. Essential hypertension predicted by tracking of elevated blood pressure from childhood to adulthood: the Bogalusa Heart Study. Am J Hypertens. 1995 Jul;8(7):657-65	C	Prospective cohort study ( 2 cohorts selected, 15 years apart)	Children and adolescents	N= 1487	Children followed into adulthood as part of the Bogalusa Heart Study (Louisiana); Mixed race (white/black only) population; 5 to 14 years of age	4- mercury sphygmonometer	N/A	N/A	Hypertension in adulthood	Yes- 6 measurements	Hypertension, defined as a SBP >140mmHg or DBP > 90mmHg is associatd with elevated blood pressure present in childhood, repeated on several occasions	Identification of early predictors of adult hypertension	Population study does not include a full range of minority populations.	B>H	Limited diversity.
PICOT1	64	77	Falkner B, Gidding SS, Portman R, Rosner B	N/A	2.4, 4.1	2008	Blood pressure variability and classification of prehypertension and hypertension in adolescence	Pediatrics	Falkner B, Gidding SS, Portman R, Rosner B. Blood pressure variability and classification of prehypertension and hypertension in adolescence. Pediatrics. 2008 Aug;122(2):238-42.	C/C	Observational cohort	Adolescents	N= 1470	Multi-ethnic, multi-racial population; Adolescents from NHANES; 13 to 15 years of age	4 Manual/mercury; measurements at 2 and 4 years	N/A	N/A	Adolescents with high BP on a single measurement session. Analysis to determine the prevelence of high BP at 2 yrs and 4 yrs	No (at least 2 measurements only)	Most ( approximalely 80% of males) and approximately 50% of females continue to have high BP on repeat BP measurement at 2 yrs and 4 yrs. Rate of progression of pre-HTN to HTN was 7% per year. Study limited to to greater than or equal to 2 manual BP measurements per visit	Observation study	NA		Up to 3 measurements during a single session only.
N/A	65	added	Tracy RE, Newman WP, 3rd, Wattigney WA, Srinivasan SR, Strong JP and Berenson GS	N/A	2.4	1995	Histologic features of atherosclerosis and hypertension from autopsies of young individuals in a defined geographic population: the Bogalusa Heart Study	Atherosclerosis	Tracy RE, Newman WP, 3rd, Wattigney WA, Srinivasan SR, Strong JP and Berenson GS. Histologic features of atherosclerosis and hypertension from autopsies of young individuals in a defined geographic population: the Bogalusa Heart Study. Atherosclerosis. 1995;116:163-79	C	Observational	Children, adolescents and young adults	N=66	Black and white person, participating in the Bogalusa heart study; 6 to 30 years of age	4- Mercury sphygmanometer	N/A	N/A	Histologic samples of the aorta (autopsy), first 6cm of the right coronary artery	Yes- average of 6 measurements (3 per examiner) with subject in relaxed, sitting position	Coronary intimal foam cells and stainable lipid correlate significantly with BP (r=0.35), age (r=0.35); there is greater intima media thickness in males versus females	Knowledge of the histologic correlates of various CVD risk factors (e.g, age, BP, race, gender)	Limited sample size	N/A	Small sample size; Limited study population.
PICOT2	66	added	Urbina EM, Khoury PR, McCoy C, Daniels SR, Kimball TR and Dolan LM	N/A	2.4, 7.1	2009	Cardiac and vascular consequences of pre-hypertension in youth	J Clin Hypertens	Urbina EM, Khoury PR, McCoy C, Daniels SR, Kimball TR and Dolan LM. Cardiac and vascular consequences of pre-hypertension in youth. J Clin Hypertens (Greenwich). 2011;13:332-42	C	Cross-sectional	Children and young adults	N= 723	Diabetic; 10 to 23 years	4- Mercury sphyngomanometer	N/A	normotensive	Actical accelerometer, fasting plasma glucose, echocardiogram measrements, carotid measurements, arterial stiffness,	3 measurements	Graded increase in augmentation index (Aix) and pulse wave velocity (PWVf) with a similar decrease in brachial artery distensibility (BrachD) among the BP groups indicating progressively stiffer vessels across the BP strata	/-	/-	N/A	None reported.
N/A	67	added	de Simone G, Devereux RB, Daniels SR, Koren MJ, Meyer RA and Laragh JH	N/A	2.4	1995	Effect of growth on variability of left ventricular mass: assessment of allometric signals in adults and children and their capacity to predict cardiovascular risk	Journal of the American College of Cardiology	de Simone G, Devereux RB, Daniels SR, Koren MJ, Meyer RA and Laragh JH. Effect of growth on variability of left ventricular mass: assessment of allometric signals in adults and children and their capacity to predict cardiovascular risk. Journal of the American College of Cardiology. 1995;25:1056-62	C	Cross-sectional	Children and adolescents	N=383 children; N= 228 adults	Children (3 months to 17 years) and adults (18 to 70 years); 3 separate locations: Italy, New York and Cincinnati	N/A	N/A	N/A	Left ventricular mass, indexed left ventricular mass by height, BSA	N/A	Variability in left ventricular mass increases with age	Understanding of the relationshipe between age and LVM	N/A	B>H
N/A	68	added	O'Leary DH, Polak JF, Kronmal RA, Manolio TA, Burke GL and Wolfson SK, Jr	N/A	2.4	1999	Carotid-artery intima and media thickness as a risk factor for myocardial infarction and stroke in older adults. Cardiovascular Health Study Collaborative Research Group	New England Journal of Medicine	O'Leary DH, Polak JF, Kronmal RA, Manolio TA, Burke GL and Wolfson SK, Jr. Carotid-artery intima and media thickness as a risk factor for myocardial infarction and stroke in older adults. Cardiovascular Health Study Collaborative Research Group. New England Journal of Medicine. 1999;340:14-22	C	Prospective cohort study	Adults	N= 4476	Participants of the Cardiovascular Health Study (conducted between 1989 to 1990)	Unknown	N/A	N/A	carotid intima media thickness (CIMT)	Unknown	Cumulative event free surival lowest for those with the highest CIMT, relaitve risk of CIMT highes for diabetes (2.2), atrial fibrillation (1.8), males gender (1.65), SBP (1.5), DBP (1.24), smoking (1.14)	Knowledge of marker for adverse CV outcome and identifcation of predictors	N/A	B>H	Adults only.
PICOT2	69	added	Mitchell GF, Hwang SJ, Vasan RS, Larson MG, Pencina MJ, Hamburg NM, Vita JA, Levy D and Benjamin EJ	N/A	2.4	2010	Arterial stiffness and cardiovascular events: the Framingham Heart Study	Circulation	Mitchell GF, Hwang SJ, Vasan RS, Larson MG, Pencina MJ, Hamburg NM, Vita JA, Levy D and Benjamin EJ. Arterial stiffness and cardiovascular events: the Framingham Heart Study. Circulation. 2010;121:505-11	C	Cross-sectional	Adults	N= 2232	All patients; Framingham Original and Offspring cohort	4- Mercury sphyngomanometer	N/A	more normal PWV	Tonometry data; Major CVD events: fatal or nonfatal myocardial infarction, unstable angina (prolonged ischemic episode with documented reversible ST segment changes), heart failure, and ischemic or hemorrhagic stroke	2-measurements	PWV ≥11.8 m/s as compared to the lowest PWV<7.8 m/s aortic PWV group after adjusting for age, sex and standard risk factors, individuals in the highest quartile had an adjusted hazards ratio of 3.4 (95% CI, 1.4 to 8.3, P=0.008)	Earlier recognition of compromised arterial stiffness		B>H
N/A	71	added	Ning H, Labarthe DR, Shay CM, Daniels SR, Hou L, Van Horn L, Lloyd-Jones DM	N/A	2.4	2015	Status of cardiovascular health in us children up to 11 years of age: The national health and nutrition examination surveys 2003-2010	Circulation	Ning H, Labarthe DR, Shay CM, Daniels SR, Hou L, Van Horn L, Lloyd-Jones DM. Status of cardiovascular health in us children up to 11 years of age: The national health and nutrition examination surveys 2003-2010. Circulation. Cardiovascular quality and outcomes. 2015;8:164-171	B	Cross-sectional	Children	N= 8961	NHANES, children 2 to 11 years of age;Multi-race, both genders, mult-ethnic	4- mercury sphygmonometer	N/A	N/A	4 out of the 7 AHA identified metrics for defining cardiovascular health	Yes- 3 measurements	0% of children had ideal levels; 0 to 0.1% with healthy weight; 88-93% with ideal BP; 67% with ideal BMI at 6 -11 years of age; 77% with ideal BMI at 2 - 5 years of age; 40% of children with intermediate or poor total cholesterol.	Knowledge of prevalence of healthy lifestyle metrics in children	Determinations of ideal CVH based upon cross-sectional data w/ reliance on recall may have led to inaccurate conclusions	B>H	Recall bias (eg, fruit and vegetable intake history). Up to 3 measurements during a single session only.
N/A	73	added	Ogden CL, Carroll MD, Lawman HG, Fryar CD, Kruszon-Moran D, Kit BK, Flegal KM	N/A	2.4	2016	Trends in Obesity Prevalence Among Children and Adolescents in the United States, 1988-1994 Through 2013-2014	JAMA	Ogden CL, Carroll MD, Lawman HG, Fryar CD, Kruszon-Moran D, Kit BK, Flegal KM. Trends in Obesity Prevalence Among Children and Adolescents in the United States, 1988-1994 Through 2013-2014. JAMA. 2016 Jun 7;315(21):2292-9	B	Cross-sectional	Children, adolescents and young adults	N= 3598	NHANES, children 2 to 19 years of age; Multi-race, both genders, multi-ethnic	N/A	N/A	N/A	BMI	N/A	Prevalence of obesity 17%; Extreme obesity 5.8%;	Knowledge of prevelence of obesity, a risk factor for hypertension	None reported	B>H	Population sample; limits of sampling
N/A	74	added	Skinner AC, Perrin EM, Skelton JA	N/A	2.4	2016	Prevalence of obesity and severe obesity in US children, 1999-2014	Obesity	Skinner AC, Perrin EM, Skelton JA. Prevalence of obesity and severe obesity in US children, 1999-2014. Obesity (Silver Spring). 2016 May;24(5):1116-23	B	Cross-sectional	Children, adolescents and young adults	N= 3523	NHANES, children 2 to 19 years of age; Mutli-race, both genders, multi-ethnic	N/A	N/A	N/A	BMI, weight to length	N/A	33.4% children with overweight. 17.4% class I obesity, 6.3% class II obesity, 2.4% class III obesity	Knowledge of prevelence of obesity, a risk factor for hypertension	None reported	B>H	Population sample; limits of sampling.
N/A	75	added	Skinner AC, Skelton JA	N/A	2.4	2014	Prevalence and trends in obesity and severe obesity among children in the United States, 1999-2012	JAMA Pediatr	Skinner AC, Skelton JA. Prevalence and trends in obesity and severe obesity among children in the United States, 1999-2012. JAMA Pediatr. 2014 Jun;168(6):561-6	C	Cross-sectional	Children	N= 26,690	NHANES, 1999-2012; 2 to 19 years of age	Unknown	N/A	N/A	Prevalence of overweight (body mass index [BMI] 85th percentile), obesity (BMI 95th percentile for age and sex), class 2 obesity (BMI 120% of the 95th percentile or BMI 35), and class 3 obesity (BMI 140% of the 95th percentile or BMI 40)	Unknown	From 2011 to 2012, 17.3%(95%CI, 15.3-19.3) of children in the United States aged 2 to 19 years were obese. Additionally, 5.9%(95%CI, 4.4-7.4) of children met criteria for class 2 obesity and 2.1% (95%CI, 1.6-2.7) met criteria for class 3 obesity. Although these rates were not significantly different from 2009 to 2010, all classes of obesity have increased over the last 14 year	Knowleldge of the increasing prevalence of childhood obesity	None reported	B>H	Study design.
N/A	76	added	Shay CM, Ning H, Daniels SR, Rooks CR, Gidding SS, Lloyd-Jones DM	N/A	2.4	2013	Status of cardiovascular health in US adolescents: prevalence estimates from the National Health and Nutrition Examination Surveys (NHANES) 2005-2010	Circulation	Shay CM, Ning H, Daniels SR, Rooks CR, Gidding SS, Lloyd-Jones DM. Status of cardiovascular health in US adolescents: prevalence estimates from the National Health and Nutrition Examination Surveys (NHANES) 2005-2010. Circulation. 2013 Apr 2;127(13):1369-76	C	Cross-sectional	Adolescents and young adults	N= 4673	NHANES, children 12 to 19 years of age; Multi-race, both genders, multi-ethnic	4- mercury sphygmonometer	N/A	N/A	Categories of cardiovascular health according to the AHA 2020: smoking status, BMI, physical activity, healthy diet score, total cholesterol, BP, fasting BG	Yes- 3 measurements	Healthy diet was the least prevalencet component across all participants while BP was the most favorable	Knowedge of the prevalence of CVD risk factors among children	None reported	B>H	Population sample; limits of sampling.
PICOT1	78	128	Kaelber DC, Pickett F	N/A	3.2a	2009	Simple table to identify children and adolescents needing further evaluation of blood pressure.	Pediatrics	Kaelber DC, Pickett F. Simple table to identify children and adolescents needing further evaluation of blood pressure. Pediatrics. 2009 Jun;123(6):e972-4.	D	Intellectual exercise	N/A	N/A (N=476 BP measurements)	All	4- mercury sphyngomanometer	N/A	N/A	N/A	N/A	Identification of cut off blood pressure values for identifying elevated blood pressure and hypertension in children and adolescents 3 to 18 years of age; 1. Reduction in the number of BP values from 476 to 64. 2. Single threshold for abnormal SBP and DBP by gender for each year of life (age 3 to 18 years). 3. 100% sensitivity. 4. Higher false positive rate. Under-represenation of abnormal BP for…	Simpler method for identifying children with elevated blood pressure and hypertension	Higher false positive rate.	B=H	None.
PICOT2	79	added	Dionne JM, Abitbol CL, Flynn JT	N/A	3.3, 4.1a	2012	Hypertension in infancy: diagnosis,management and outcome.	Pediatr Nephrol	Dionne JM, Abitbol CL, Flynn JT. Hypertension in infancy: diagnosis, management and outcome. Pediatr Nephrol. 2012 Jan;27(1):17-32.	D/EO	Review	Neonates and infants	N/A	Neonates and infants	N/A	N/A	N/A	N/A	N/A.	Summary: 1. Gold standard method for BP assessment is intra-arterial analysis. 2. Prevalence of HTN in the neonate is ~0.2 to 3%, but is higher in those with bronchopulmonary dysplasia, PDA, intraventricular hemorrhage, and in those with an indwelling umbilical artery catheter (up to 9% develop HTN). 3. BP patterns may vary based upon developmental stage and gestational age. Best to use gestation…	Clearer definitions of hypertension in infancy.		Limited data regarding how HTN is defined in infancy and outcome.	Review article.
N/A	80	added	Kent AL, Chaudhari T	N/A	3.3	2013	Determinants of neonatal blood pressure	Curr Hypertens Rep	Kent AL, Chaudhari T. Determinants of neonatal blood pressure. Curr Hypertens Rep. 2013 Oct;15(5):426-3	D/EO	Review	Neonates	N/A	N/A	N/A	N/A	N/A	N/A	N/A	1. Determinants of BP in preterm infants after day of life #1, : Post menstrual age 2. Most important determinants of BP in newborns: gestational age, postconceptual age, and birthweight	Knowledge of risk factors for hypertension in the neonatal period		B>H	Reivew article.
PICOT4	82	155	Savoca MR, MacKey ML, Evans CD, Wilson M, Ludwig DA, Harshfield GA.	N/A	4.1	2005	Association of ambulatory blood pressure and dietary caffeine in adolescents	Am J Hypertens	Savoca MR, MacKey ML, Evans CD, Wilson M, Ludwig DA, Harshfield GA. Association of ambulatory blood pressure and dietary caffeine in adolescents. Am J Hypertens. 2005 Jan;18(1):116-20.	C	Cross-sectional	Adolescents and young adults	N=82	African American and non-Hispanic white adolescents; 15-19 years of age	ABPM	Na controlled diet with various amounts of caffeine	N/A	SBP and DBP by caffeine level	N/A- ABPM	Daytime SBP and DBP increased with greater caffeine intake. There was a trend for AA subjects to experience larger increases in SBP compared to non-Hispanic whites. No association was detected between caffeine intake and nighttime BP.	Knowledge of the impact of caffeine intake on adolescent BP	None reported	B>H	Small sample size.
PICOT1	84	34	Becton LJ, Egan BM, Hailpern SM, Shatat IF	3	4.1	2013	Blood pressure reclassification in adolescents based on repeat clinic blood pressure measurements	Journal of clinical hypertension (Greenwich, Conn.)	Becton LJ, Egan BM, Hailpern SM, Shatat IF. Blood pressure reclassification in adolescents based on repeat clinic blood pressure measurements. J Clin Hypertens (Greenwich). 2013 Oct;15(10):717-22.	C	Cross-sectional study	Children and adolescents	N= 1730	Children 13 to 18 years of age; NHANES 2005-2008; Obese, minorities, poor	4. Mercury sphyngomonometer	N/A	N/A	Direction of BP classification change with repeat measures ; Compared to first isolated BP measurement, after repeat BP (3 times), 2.9% had increased BP, 6.2% had a decrease in BP stage and 91% had no change in BP (1st BP versus average of 3 measures); these patients tended to have higher BMI and higher CRP levels	Yes- 3 measurements	90.0% (n=1569) BP category did not change [86.6 normal; 11.2% prehypertension and 2.2% hypertension] 6.2% (n=107) BP category went down [85.1% prehypertension and 15% as hypertension] 2.9% (n=49) BP caategory increased [81.6% normal BP and 18.4% prehypertension]	Knowledge of the impact of repeat BP measurement on BP assessment	Single measure may misclassify BP category and lead to inappropriate action	B=H
PICOT1	85	added	Daley MF, Sinaiko AR, Reifler LM, Tavel HM, Glanz JM, Margolis KL, Parker E, Trower NK, Chandra M, Sherwood NE, Adams K, Kharbanda EO, Greenspan LC, Lo JC, O'Connor PJ, Magid DJ	3	4.4	2013	Patterns of care and persistence after incident elevated blood pressure	Pediatrics	Daley MF, Sinaiko AR, Reifler LM, Tavel HM, Glanz JM, Margolis KL, Parker E, Trower NK, Chandra M, Sherwood NE, Adams K, Kharbanda EO, Greenspan LC, Lo JC, O'Connor PJ, Magid DJ. Patterns of care and persistence after incident elevated blood pressure. Pediatrics. 2013 Aug;132(2):e349-55	C	Retropsective Cohort Study	Children and adolescents	N= 72625; N= 61108 (8.4%) with incident elevated blood pressure	3 to 17 years of age; Children participating in Health Partners Kaiser Permanente, Norhern California; Healt Partners of Minnesota; Kaiser Permanente Colorado	4- aneroid sphyngomanometer (predominantly)	N/A	N/A	Primary outcome: proportion of subjucts with incident elevated BP > 95th percentile who had a repeat BP measurement within 1month of initial measurement	No- at least 2 measurements	1. 8.4% with incident elevated BP. 2. 20.9% with repeat BP within 1 month. 3. 2nd and 3rd consecutive elevated BPs within 12 months, ~1.%	Knowledge of patterns of care after incident elevated BP.	none reported	B=H	Retrospective study; possible mssing data.
PICOT1	86	210	Ostchega Y, Prineas RJ, Nwankwo T, Zipf G	5	4.1, 4.5	2011	Assessing blood pressure accuracy of an aneroid sphygmomanometer in a national survey environment	American journal of hypertension	Ostchega Y, Prineas RJ, Nwankwo T, Zipf G. Assessing blood pressure accuracy of an aneroid sphygmomanometer in a national survey environment. Am J Hypertens. 2011 Mar;24(3):322-7.	C	Cross-sectional	Children and adults; NHANES	N= 727	NHANES participants, 2006-2007	4- aneroid sphyngomanometer	N/A	mercury sphygmomanometer	SBP and DBP	Yes- total number however not stated	No statistically significant differences btw mercury sphyngomonometer (HgS) and aneroid sphyngomonometer (AnS) readings overall or for each age group and cuff size category except mean SBP for ages 8-17 (HgS=104.77, AnS=105.87, p=0.011). Good agreement in classification of elevated SBP, DBP and HTN (k=0.82, 0.75, 0.81).HgS identified a slightly higher proportion of HTN than AnS, but not statistic…	Need to replace HgS given concerns about mercury disposal.	Lower estimate of HTN prevalence by AnS (result of 81% sensitivity) could be a problem when comparing national prevalence estimates in future.	B>H	Simple type of aneroid device (Welch Allyn studied).
PICOT1	87	added	Ma Y, Temprosa M, Fowler S, Prineas RJ, Montez MG, Brown-Friday J, Carrion-Petersen ML, Whittington T; Diabetes Prevention Program Research Group	N/A	4.1	2009	Evaluating the accuracy of an aneroid sphygmomanometer in a clinical trial setting	Am J Hypertens	Ma Y, Temprosa M, Fowler S, Prineas RJ, Montez MG, Brown-Friday J, Carrion-Petersen ML, Whittington T; Diabetes Prevention Program Research Group.. Evaluating the accuracy of an aneroid sphygmomanometer in a clinical trial setting. Am J Hypertens. 2009 Mar;22(3):263-6	A	RCT	Children	N= 958	Pre-diabetic children. Diabetes Prevention Program Outcomes Study (DPPOS)	4- aneroid/mercury sphyngomanometer	N/A	mercury sphygmomanometer	BP	No- 2 measurements	The Welch allyn Tycos 767-Series Mobile aneroid model 7670−04 tested in this validation study can be used to replace mercury model in clinical trials	Knowledge of the validity of the aneroid sphyngomanometer	None reported	B>H	None reported.
PICOT1	88	216	Podoll A, Grenier M, Croix B, Feig DI	5	4.1, 4.5	2007	Inaccuracy in pediatric outpatient blood pressure measurement	Pediatrics	Podoll A, Grenier M, Croix B, Feig DI. Inaccuracy in pediatric outpatient blood pressure measurement. Pediatrics. 2007 Mar;119(3):e538-43.	B/C	Retrospective cross-sectional	Infants and children	N= 390	n/a	1- Oscillometric (Dinamap)	N/A	N/A	Difference between SBP and DBP taken at vital sign station and in exam room	No - 2 measurements	Mean differences for BPs at vital sign station (VSS) and examination room (EXR) were 13.2 for SBP and 9.6 for DBP. VSS measurement usually higher. SBP r=0.7199 and DBP r=0.5947. Age, gender, race, obesity, first vs subsequent visit, essential vs secondary, white coat HTN and antihypertensive medications made no statistically significant difference in lack of correlation.	Knowledge of the difference between BPs obtained at vital sign stations versus later during the visit.	Overestimate of the blood pressure at the vital sign station	B<H	Single center HTN clinic, did not control for cuff size and did not randomize order.
PICOT1	89	195	Mourad A	N/A	4.1	2004	Arm position and blood pressure: an audit	Intern Med J	Mourad A, Carney S. Arm position and blood pressure: an audit. Intern Med J. 2004 May;34(5):290-1	D	Audit of providers	N/A	N= 182	Health care professionals	N/A	N/A	N/A	BP	N/A	Arm position can stronly influence the diagnosis and treatment of HTN. Many clinicians are unaware of both the importance of arm position in the measurement.	Knowledge of the impact measurement/arm position in BP.	none reported	B>H	Small study; sampling approach may not be reflective of all providers.
PICOT1	91	added	Zaheer S, Watson L, Webb NJ	N/A	4.1	2014	Unmet needs in the measurement of blood pressure in primary care. Arch Dis Child	Arch Dis Child	Zaheer S, Watson L, Webb NJ. Unmet needs in the measurement of blood pressure in primary care. Arch Dis Child. 2014 May;99(5):463-4	B	Survey study	N/A	N=103	Primary care practices within a 4 mile radius of the Royal Manchester Children's Hospital	N/A	N/A	N/A	Practice demographics, availability of BP measuring equipment, reported confidence in assessing BP in children	N/A	1. Majority of primary care centers (in this sample) do not have the necessary equipment to measure BP in children. 2. Among this UK sampling only 5/95 had > 2 different cuff sizes available 3. Majority of practices use automated devices (66/95, 69%) and (18/95, 19%) use a manual machine.	Knowledge of how well equipped pediatric practices are to carry out appropriate blood pressure assessments in children.	none reported	B>H	UK practices only.
PICOT1	92	added	Veiga EV, Arcuri EA, Cloutier L, Santos JL	N/A	4.1	2009	Blood pressure measurement: arm circumference and cuff size availability	Rev Lat Am Enfermagem	Veiga EV, Arcuri EA, Cloutier L, Santos JL. Blood pressure measurement: armcircumference and cuff size availability. Rev Lat Am Enfermagem. 2009 Jul-Aug;17(4):455-61	C	Cross-sectional	Adolescents and adults	N= 81	Adolescents, adults and elderly; Medical wards of various subspecialities within San Paulo, Brazil	N/A (goal: assessment of appropriate BP cuff size)	N/A	N/A	Measurement of arm circumference	N/A	Lack of availability of an appropriate range of blood pressure cuffs for in many practices.	Knowledge of the limitatation of proper BP assessment in the clinic setting.	none reported	B>H	Non-US clinics. May not accurately reflect US experience.
PICOT1	93	added	Thomas M, Radford T, Dasgupta	N/A	4.1	2001	Unvalidated blood pressure devices with small cuffs are being used in hospitals		Thomas M, Radford T, Dasgupta I. Unvalidated blood pressure devices with small cuffs are being used in hospitals. BMJ. 2001 Aug 18;323(7309):398	D	(brief) survey	N/A	N= 48	BP Devices	N/A	N/A	N/A	Assessment of the validation of selected devices	N/A	None of the selected devices were validated	Use of unvalidated devices is common	none reported	B<H	Small sample.
PICOT1	94	added	Burke MJ, Towers HM, O'Malley K, Fitzgerald DJ, O'Brien ET	N/A	4.1	1982	Sphygmomanometers in hospital and family practice: problems and recommendations	Br Med	Burke MJ, Towers HM, O'Malley K, Fitzgerald DJ, O'Brien ET. Sphygmomanometers in hospital and family practice: problems and recommendations. Br Med J (Clin Res Ed). 1982 Aug 14;285(6340):469-71	C	Cross-sectional	N/A	N=100, N=50 mercury, N=50 aneroid	Sphyngomanometers	N/A	N/A	N/A	Assessment of device performance	N/A	Device malfunctions with mercury devices are common;.	Knowledge of limitation of sphygmomanometers	none reported	B>H	Small sample.
PICOT1	96	added	Prineas RJ, Ostchega Y, Carroll M, Dillon C, McDowell M	N/A	4.1, 4.8	2007	US demographic trends in mid-arm circumference and recommended blood pressure cuffs for children and adolescents: data from the National Health and Nutrition Examination Survey 1988-2004	Blood Press Monit	Prineas RJ, Ostchega Y, Carroll M, Dillon C, McDowell M. US demographic trends in mid-arm circumference and recommended blood pressure cuffs for children and adolescents: data from the National Health and Nutrition Examination Survey 1988-2004. Blood Press Monit. 2007 Apr;12(2):75-80	C	Cross-sectional	Children	N= 5111	Children 7-17 years of age; NHANES	N/A	N/A	N/A	N/A	N/A	Arm circumference for youth has increased over time suggesting that larger BP cuffs must be used in order to obtain appropriate BP measurements	Knowledge of the impact of obesity and increased BMI on BP measurements	none reported	B>H	Cross-sectional study.
PICOT1	97	added	Kimble KJ, Darnall RA Jr, Yelderman M, Ariagno RL, Ream AK	N/A	4.1a	1981	An automated oscillometric technique for estimating mean arterial pressure in critically ill newborns	Anesthesiology	Kimble KJ, Darnall RA Jr, Yelderman M, Ariagno RL, Ream AK. An automated oscillometric technique for estimating mean arterial pressure in critically ill newborns. Anesthesiology. 1981 May;54(5):423-5	C	Cross-sectional	Neonates and infants	N=17	Neonates and infants with indwelling catheters	1- Oscillometric (compared to intra-arterial mean pressure)	N/A	N/A	Correlation between intra-arterial pressure and DinaMap	Unknown	Good correlation	Knowledge of correlation between intra-arterial pressure and Dinamap	none reported	B>H	Small sample.
PICOT1	98	added	Sonesson SE, Broberger U	N/A	4.1a	1987	Arterial blood pressure in the very low birthweight neonate	Acta Paediatr Scand	Sonesson SE, Broberger U. Arterial blood pressure in the very low birthweight neonate. Evaluation of an automatic oscillometric technique. Acta Paediatr Scand. 1987 Mar;76(2):338-41	C	Cohort study	Infants	N=15	Very low birthweight infants	1	N/A	Umbilical artery (aterial) pressure measurment	BP	Unknown	Using a cuff width to arm circumference ratio of 0.33-0.42, mean blood pressure was overestimated by 6.2 (7.2) mmHg (mean and 1 SD), p less than 0.001. More accurate mean blood pressure measurements were recorded with a cuff width to arm circumference ratio of 0.44-0.55. Measurements of systolic and diastolic blood pressure showed similar results	Knowledge of appropriate BP cuff width size for measuring BP in VLBW infants	none reported	B>H	Small sample size.
PICOT1	99	added	Duncan AF, Rosenfeld CR, Morgan JS, Ahmad N, Heyne RJ	N/A	4.1a	2008	Interrater reliability and effect of state on blood pressure measurements in infants 1 to 3 years of age. Pediatrics	Pediatrics	Duncan AF, Rosenfeld CR, Morgan JS, Ahmad N, Heyne RJ. Interrater reliability and effect of state on blood pressure measurements in infants 1 to 3 years of age. Pediatrics. 2008 Sep;122(3):e590-4	B	1 studies: 1-prospective cohort study, children 1-3 years; 2- Cross-sectional study, BW < 1500g	Children	Study 1: N= 28; Study 2: N=120	Children < 3 years of age, participating in a single site (Dallas) at risk clinic	4- aneroid sphyngomanometer	N/A	N/A	SBP only; Interrater reliability of manual BP assessment (2 raters) for children <3 years at various stages of calm and activity	No -1 measurement per rater (2 raters)	Good interobserver correlation.	Feasibility of SBP assessents in young children	none reported	B>H	Small sample.
PICOT1	100	added	Nwankwo MU, Lorenz JM, Gardiner JC	N/A	4.1a	1997	A standard protocol for blood pressure measurement in the newborn	Pediatrics	Nwankwo MU, Lorenz JM, Gardiner JC. A standard protocol for blood pressure measurement in the newborn. Pediatrics. 1997 Jun;99(6):E10	C	Cross-sectional	Infants	N= 64	Infants with BW <2500g between 7 and 42 days	1- oscillometric; Dinamap	N/A	N/A	BP and reliability of measurement	Yes- 3 consecutive measurements (obtained 2 minutes apart)	Protocoled BP assessment (waiting 1 1/2 hours after a feed, measuring the BP after 25 min of rest with 2 min in between each measurement--> less variability in measurement	Protocol for assessing BP in infants that reduces variablity in measurement	none reported	B>H	Small sample.
PICOT1; N/A	101	added	Gupta-Malhotra M, Banker A, Shete S, Hashmi SS, Tyson JE, Barratt MS, Hecht JT, Milewicz DM, Boerwinkle E	1	4.2, 5.2, 5.3, 6.2a	2015	Essential hypertension vs. secondary hypertension among children. Am J Hypertens	Am J Hypertens	Gupta-Malhotra M, Banker A, Shete S, Hashmi SS, Tyson JE, Barratt MS, Hecht JT, Milewicz DM, Boerwinkle E. Essential hypertension vs. secondary hypertension among children. Am J Hypertens. 2015 Jan;28(1):73-80	B	Retropsective Cohort Study	Infants, children, adolescents	N= 275	Children 0-19 years of age referred to HTN clinic; single center (UT Health Science Center) study.	1- oscillometric, 4-mercury (confirmatory); 2- ABPM, for further confirmation and diagnosing WCH versus HTN	N/A	N/A	N/A	Yes- at least 3 measurements + ABPM	1. Phenotype of essential HTN can present as early as 3 years of age; predominant form of HTN after 6 years of age is essential HTN; 2. Of children with a diagnosis of HTN, 11% normotensive, 11% WCH, 10% preHTN, 65% HTN (43% essential, 57% secondary); 3. Median age with essential HTN is 12 years; median age with secondary HTN is 9 years; 4. Causes of secondary HTN: 34% renal, 20% respiratory, 12%…	Updated information regarding prevlanece of essential and secondary HTN	none reported	B>H	Single center.
PICOT1	102	added	Kelly RK, Thomson R, Smith KJ, Dwyer T, Venn A, Magnussen CG	1	4.2	2015	Factors Affecting Tracking of Blood Pressure from Childhood to Adulthood: The Childhood Determinants of Adult Health Study	J Pediatr	Kelly RK, Thomson R, Smith KJ, Dwyer T, Venn A, Magnussen CG. Factors Affecting Tracking of Blood Pressure from Childhood to Adulthood: The Childhood Determinants of Adult Health Study. J Pediatr. 2015 Dec;167(6):1422-8.e2	B	Retropsective Cohort Study (retrospective analysis of prospectively acquired data)	Children and adolescents	N=798	At baseline, enrollees were 7-15 years of age at entry to Childhood Determinants of Adult Health Study; BPs obtained at 9, 12, and 15 years of age and then 20 years later	4- mercurry (2 measurements);1- oscillometric (confirmatory)	N/A	N/A	N/A	Yes- at least 3 (but by 2 different methods)	Relative to those with persistently elevated BP, participants with resolution of elevated blood pressure over time had significant decreases in BMI, alcohol consumption, and increased vegetable intake; participants with upwardly mobile socioeconomic status had significantly higher resolution of elevated BP	Knowledge of factors contributing to persistently elevated BP from childhood to adulthood	none reported	B>H	Non-US population (Australian population).
PICOT3	103	added	Juhola J, Magnussen CG, Berenson GS, Venn A, Burns TL, Sabin MA, Srinivasan SR, Daniels SR, Davis PH, Chen W, Kähönen M, Taittonen L, Urbina E, Viikari JS, Dwyer T, Raitakari OT, Juonala M	1,19	4.2,8.1., 8.5, 7.1	2013	Combined effects of child and adult elevated blood pressure on subclinical atherosclerosis: the International Childhood Cardiovascular Cohort Consortium	Circulation	Juhola J, Magnussen CG, Berenson GS, Venn A, Burns TL, Sabin MA, Srinivasan SR, Daniels SR, Davis PH, Chen W, Kähönen M, Taittonen L, Urbina E, Viikari JS, Dwyer T, Raitakari OT, Juonala M. Combined effects of child and adult elevated blood pressure on subclinical atherosclerosis: the International Childhood Cardiovascular Cohort Consortium. Circulation. 2013 Jul 16;128(3):217-24	B	Cross-sectional study of data from 4 prospective cohort studies (combined data from Bogalusa, Muscatine; Australia Childhood Determinants of health study; Young Finns Study), patients followed from childhood into adulthood	Children, adolescents and adults	N=4210 (N=721, Muscatine/USA study; N=586, Bogalusa/USA study	USA, Australia; Bogalusa, ages 4-17 and 23-42years of age; Muscatine, 33-45 years of age	Unknown (see original studies)	N/A	N/A	CIMT	Not reported (see original studies)	If elevated BP in childhood and normal BP in adulthood, then the risk of increased cIMT in adulthood was somewhat higher (RR 1.2), but not significantly increased compared to those with persistently normal BP. In contrast, adults with elevated BP, irrespective of their childhood BP status, had significantly increased risk of high cIMT.	Knowledge of the relationship between BP and CIMT	none reported	B>H	Non-US study.
PICOT3/PICOT4	104	151/170	Sladowska-Kozłowska J, Litwin M, Niemirska A, Wierzbicka A, Wawer ZT, Janas R	1	4.2, 7.1	2011	Change in left ventricular geometry during antihypertensive treatment in children with primary hypertension	Pediatric Nephrology	Sladowska-Kozłowska J, Litwin M, Niemirska A, Wierzbicka A, Wawer ZT, Janas R. Change in left ventricular geometry during antihypertensive treatment in children with primary hypertension. Pediatr Nephrol. 2011 Dec;26(12):2201-9.	B	Before-after treatment design	Children	N= 86	Children with untreated pediatric hypertension	2	1 year of antihypertensive therapy	Before vs. after anti-hypertensive therapy	Left ventricular geometry	N/A- ABPM	The prevalence of hypertension changed, but the prevalence of concentric LV hypertrophy did not. LV geometry is associated with obesity.	Knoweledge of risk factors for LVH	LVH is associated with increased TG/HDL ratio	B>H	Limited sample size.
PICOT4	105	525	Litwin M, Niemirska A, Sladowska-Kozlowska J, Wierzbicka A, Janas R, Wawer ZT, Wisniewski A, Feber J	1	4.2, 7.1	2010	Regression of target organ damage in children and adolescents with primary hypertension	Pediatric nephrology (Berlin, Germany)	Litwin M, Niemirska A, Sladowska-Kozlowska J, Wierzbicka A, Janas R, Wawer ZT, Wisniewski A, Feber J. Regression of target organ damage in children and adolescents with primary hypertension. Pediatr Nephrol. 2010 Dec;25(12):2489-99	B	Prospective, Observational	86 children with newly diagnosed primary hypertension (ABP > 95th %ile)ages 5-17 years, mean age 14.1 +/- 2.4 yrs.	N=86	Children with newly diagnosed primary hypertension	2	All subjects were informed about the principles of non-pharmacologic treatment of HT, including increasing pysical activity up to 90 minutes per day and dietary modifications including salt avoidance and reduction in sugar consumption and were referred to an external consultant. Anthropometric measurements included BMI, waist-to-hip ratio (WHR), waist-to-height ratio (WHtR), BP, cIMT and femoral …	non pharmacologic treatment group	Standard non-pharmacologic therapy and pharmacologic therapy in children with primary hypertension led to normalization of BP in 74% of subjects,regression of TOD, and normalization of metabolic abnormalities. The main determinant of regression of TOD was the decrease in abdominal obesity with an increase in lean body mass and not BP lowering. Decrease in BP was associated with lower IMT, inflamm…	N/A- ABPM	Predictor of decrease in indexed left ventricular mass (LVMIi) includes: decreased waiste circumference	Knowledge of predictors of decreased left ventricular mass	None reported	B>H	Observational study design.
PICOT1	106	added	Meyer AA, Kundt G, Lenschow U, Schuff-Werner P, Kienast W	1, 2, 26	4.2, 8.2	2006	Improvement of early vascular changes and cardiovascular risk factors in obese children after a six-month exercise program	J Am Coll Cardiol	Meyer AA, Kundt G, Lenschow U, Schuff-Werner P, Kienast W. Improvement of early vascular changes and cardiovascular risk factors in obese children after a six-month exercise program. J Am Coll Cardiol. 2006 Nov 7;48(9):1865-70	B	Prospective cohort study	Children	N= 67	Obese children	1, 2	Exercise program, 6 months in duration (3 times per week: Monday- swimming/aqua-aerobics, Wednesday- 90min sports gamea, Friday- walking	Age matched control	FMD, CIMT	N/A- ABPM	Compared to lean children, obese children have impaired FMD, increased IMT and increased risk factors for cardiovascular disease. Exercise interventions results improved FMD, CIMT and lower risk factors for cardiovascular disease (BMI, fasting insulin, TG, lipid levels, CRP and other markers of inflammation)	Knowledge of the potential position impact of exercise on FMD, CIMT and CVD risk factors	None reported	B>H	High dropout rate.
PICOT1	107	added	Juonala M, Magnussen CG, Berenson GS, Venn A, Burns TL, Sabin MA, Srinivasan SR, Daniels SR, Davis PH, Chen W, Sun C, Cheung M, Viikari JS, Dwyer T, Raitakari OT	2	4.2	2011	Childhood adiposity, adult adiposity, and cardiovascular risk factor	N Engl J Med	Juonala M, Magnussen CG, Berenson GS, Venn A, Burns TL, Sabin MA, Srinivasan SR, Daniels SR, Davis PH, Chen W, Sun C, Cheung M, Viikari JS, Dwyer T, Raitakari OT. Childhood adiposity, adult adiposity, and cardiovascular risk factors. N Engl J Med. 2011 Nov 17;365(20):1876-85	B	Study of 4 longitudinal cohort studies	Children, adolescents and adults	N= 6328	N=4210 (N=721, Muscatine/USA study; N=586, Bogalusa/USA study; (Bogalusa, ages 4-17 and 23-42years of age; Muscatine, 33-45 years of age)	Unknown (see original studies)	N/A	N/A	N/A	Unknown (see original studies)	Overweight or obese children who were obese as adults had increased risks of type 2 diabetes, hypertension, dyslipidemia, and carotid-artery atherosclerosis. The risks of these outcomes among overweight or obese children who became nonobese by adulthood were similar to those among persons who were never obese	Knowledge of childhood related risk factors for adult cardiovascular disease	none reported	B>H
PICOT1	108	added	Lo JC, Chandra M, Sinaiko A, Daniels SR, Prineas RJ, Maring B, Parker ED, Sherwood NE, Daley MF, Kharbanda EO, Adams KF, Magid DJ, O'Connor PJ, Greenspan LC	1	4.2	2014	Severe obesity in children: prevalence, persistence and relation to hypertension	Int J Pediatr Endocrinol	Lo JC, Chandra M, Sinaiko A, Daniels SR, Prineas RJ, Maring B, Parker ED, Sherwood NE, Daley MF, Kharbanda EO, Adams KF, Magid DJ, O'Connor PJ, Greenspan LC. Severe obesity in children: prevalence, persistence and relation to hypertension. Int J Pediatr Endocrinol. 2014 Mar 3;2014(1):3	C	Retrospective study	Children and adolescents	N= 117,618	Children 6-17 years of age; Kaiser permanente	Unknown	N/A	N/A	N/A	N/A	Prevalence of obesity was 17.9% overall and was highest among Hispanics (28.9%) and blacks (20.5%) for boys, and blacks (23.3%) and Hispanics (21.5%) for girls. Severe obesity prevalence was 5.6% overall and was highest in 12–17 year old Hispanic boys (10.6%) and black girls (9.5%)	Update regarding prevalence of severe obesity	none reported	B>H	Single health care system.
PICOT1	109	added	Rademacher ER, Jacobs DR Jr, Moran A, Steinberger J, Prineas RJ, Sinaiko A	1	4.2	2009	Relation of blood pressure and body mass index during childhood to cardiovascular risk factor levels in young adults	J Hypertens	Rademacher ER, Jacobs DR Jr, Moran A, Steinberger J, Prineas RJ, Sinaiko A. Relation of blood pressure and body mass index during childhood to cardiovascular risk factor levels in young adults. J Hypertens. 2009 Sep;27(9):1766-74	D	Cross-sectional	Children	N= 186	2 longitudinal studies with a baseline evaluation at mean age 13 and a follow-up at mean age 24 ; first cohort: children w/ BP > 85th percentile participating in the Sodium-Potassium Blood Pressure Trial in Children (NAKS)) recruited at age 11-15 years (mean age 13), four year intervention trial to study the effect of potassium supplementation or sodium restriction; 2nd cohort: recruited after bl…	4- mercury	N/A	N/A	N/A	No- 2 measurements only	Univariate analysis, childhood body mass index predicted young adult blood pressure, lipids, glucose, insulin, and insulin resistance, while childhood blood pressure predicted young adult blood pressure, lipids and glucose. In a multivariable regression model (adjusted for age, sex and race) which included change in body mass index and blood pressure from age 13 to 24, body mass index predicted a…	Knowledge of predictors of young adult CVD risk factors	none reported	B>H	Cross-sectional study; Suggests causation, but study design does not allow for this conclusion and only association.
PICOT4	111	added	Levitt Katz L, Gidding SS, Bacha F, Hirst K, McKay S, Pyle L, Lima JA; TODAY Study Group	2,26	4.2, 8.2	2015	Alterations in left ventricular, left atrial, and right ventricular structure and function to cardiovascular risk factors in adolescents with type 2 diabetes participating in the TODAY clinical trial	Pediatr Diabetes	Levitt Katz L, Gidding SS, Bacha F, Hirst K, McKay S, Pyle L, Lima JA; TODAY Study Group.. Alterations in left ventricular, left atrial, and right ventricular structure and function to cardiovascular risk factors in adolescents with type 2 diabetes participating in the TODAY clinical trial. Pediatr Diabetes. 2015 Feb;16(1):39-47	C	Randomized trial	Children and adolescents	N= 542	Participants in the TODAY trial; Children and adolescents 10–17 years of age, <2 years duration of type 2 diabetes, BMI > 85%, HbA1c #8% on metformin therapy, controlled blood pressure (BP), and calculated creatinine clearance .70 mL/min	1	metformin, metformin plus rosiglitazone, or metformin plus intensive lifestyle intervention	N/A	LV dimensions	No - single measurement (at the time of the vist),despite multiple visits	Determinants of higher LVM were male gender, black race, baseline and increasing body mass index (BMI), baseline and increasing systolic blood pressure (SBP), use of BP medications, maintenance of glycemic control, and smoking; heart rate (HR) was inversely related	Knowlwedge of determinants of increased LVM among children and adolescents with T2DM	T2DM is associated with increased LVM	B>H	Single time-point for LV measurement.
PICOT2	112	added	Hager A, Kanz S, Kaemmerer H, Schreiber C, Hess J	2	4.2, 5.3, Table 12	2007	Coarctation Long-term Assessment (COALA): significance of arterial hypertension in a cohort of 404 patients up to 27 years after surgical repair of isolated coarctation of the aorta, even in the absence of restenosis and prosthetic material	J Thorac Cardiovasc Surg	Hager A, Kanz S, Kaemmerer H, Schreiber C, Hess J. Coarctation Long-term Assessment (COALA): significance of arterial hypertension in a cohort of 404 patients up to 27 years after surgical repair of isolated coarctation of the aorta, even in the absence of restenosis and prosthetic material. J Thorac Cardiovasc Surg. 2007 Sep;134(3):738-45	B	Retropsective Cohort Study	Children, adolescents and adults	N= 273	German persons, 16 to 73 years of age. History of coarctation of the aorta repair 1-27 years prior (by a variety of techniques). Living at the time of analysis.	2- ABPM	N/A	N/A	ABPM, BP during exercise	N/A- ABPM	Prevalence of hypetension increases over time following coarctation repair, regardless of the type of repair. Risk factors for hypertension: male sex, higher age at surgical intervention, resection with prosthetic tube grafts, current status with prosthetic material, higher age at follow-up, and a higher brachial–ankle difference	Earlier recognition and treatment of HTN.	N/A	B>H	No clearly defined method for diagnosing restenosis.
PICOT2	113	added	O'Sullivan JJ, Derrick G, Darnell R	1	4.2, 5.3, Table 12	2002	Prevalence of hypertension in children after early repair of coarctation of the aorta: a cohort study using casual and 24 hour blood pressure measurement	Heart	O'Sullivan JJ, Derrick G, Darnell R. Prevalence of hypertension in children after early repair of coarctation of the aorta: a cohort study using casual and 24 hour blood pressure measurement. Heart. 2002 Aug;88(2):163-6.	C	Case-Control	Children and adolescents	N=116 (cases)	Diagnosis of aortic coarcation with h/o repair; 6 to 16 years of age	Manual BP (in office), ABPM	N/A	N=1034 (healthy school aged children)	ABPM >95th percentile, LVH	Yes	28% of children with a history of coarctation have HTN by casual BP assessment; 30% have HTN by ABPM	Greater chance for early treatment if recognized early.	None	B>H
PICOT1	115	added	Brady TM, Solomon BS, Neu AM, Siberry GK, Parekh RS	4	4.4, 14	2010	Patient-, provider-, and clinic-level predictors of unrecognized elevated blood pressure in children	Pediatrics	Brady TM, Solomon BS, Neu AM, Siberry GK, Parekh RS. Patient-, provider-, and clinic-level predictors of unrecognized elevated blood pressure in children. Pediatrics. 2010 Jun;125(6):e1286-93	C	Cross-sectional	Children, adolescents and adults	N= 779	Children, adolescents and adults 3 to 20 years of age; Children from a single, urban, pediatric primary care center	Oscillometric	N/A	N/A	N/A	No- single measurement (but study was designed to assess whether BP measurement was reassessed	Elevated BP was unrecognized by proivders 726/779 cases. Patient level predictors of under recognition of elevated BP included: SBP < 120mmHg (OR 7.7, 3.2- 18.6), DBP < 80mmHg (OR 2.4, 1.1- 5.0), decreased BMI Z-scsore, male gender, older age, lack of family history of CVD, negative medical findings	Knowledge of how often BP elevation is unrecognized by providers		B>H
PICOT1	116	added	Stabouli S, Sideras L, Vareta G, Eustratiadou M, Printza N, Dotis J, Kotsis V, Papachristou F	4	4.4	2015	Hypertension screening during healthcare pediatric visits	J Hypertens	Stabouli S, Sideras L, Vareta G, Eustratiadou M, Printza N, Dotis J, Kotsis V, Papachristou F. Hypertension screening during healthcare pediatric visits. J Hypertens. 2015 May;33(5):1064-8	C	Cross-sectional	Children	N=150	Children; mean age of 6 years; 21% infants, 35% toddlers, 22% school aged children, 22% adolescentsGreek children,followed in the outpatient setting after having been hospitalized at the Children's hospital	Oscillometric	N/A	N/A	N/A	Yes- at least 3 measurements	1. BP measurement obained at least once in 45% in children, but was frequently not measured. 2. low BW, prematurity and other risk factors for hypertension did not result in an increase likelihood of BP assessment			B=H	Non-US population; Potential for recall bias (families asked to recal if and how often BP was assessed).
PICOT1	117	240	Shapiro DJ, Hersh AL, Cabana MD, Sutherland SM, Patel AI	4	4.4	2012	Hypertension screening during ambulatory pediatric visits in the United States, 2000-2009	Pediatrics	Shapiro DJ, Hersh AL, Cabana MD, Sutherland SM, Patel AI. Hypertension screening during ambulatory pediatric visits in the United States, 2000-2009. Pediatrics. 2012 Oct;130(4):604-10.	B/B -BF	Cross-sectional	Children and adolescents	N= 15,334	Compiled from 2 study populations, children 3-18 years of age; Diverse racially and ethnically; data obtained from National Ambulatory Medical Care Survey and National Hospital Ambulatory Medical Care Survey	Unknown	N/A	None	Screening is only done in 35% of ambulatory pedi visits. 67^ of preventative visits. Up to 84% if obesity is diagnosed. Screening increased from 2000 to 2009.	Unknown	HTN screening in 35% of ambulatory pediatric visits; 67% of preventaive visits, 84% in preventative visits for obesity/overweight	Knowledge of the frequency with which BP is assessed		B>H
PICOT1	118	37	Bijlsma MW, Blufpand HN, Kaspers GJ, Bökenkamp A	4	4.4	2014	Why pediatricians fail to diagnose hypertension: a multicenter survey	The Journal of pediatrics	Bijlsma MW, Blufpand HN, Kaspers GJ, Bökenkamp A. Why pediatricians fail to diagnose hypertension: a multicenter survey. J Pediatr. 2014 Jan;164(1):173-177.e7.	C/ Rea C C/ AC	Observational study (survey)	Children	N= 197	Survey of providers caring for Dutch children	N/A	N/A	N/A	survey questions	N/A	Why Pediatricians fail to diagnose hypertension: 83% gave correct def of HTN, 71% measure BP only if pt has risk factors for HTN; only 65% look up the percentiles using BP tables when % suspected to be elevated; 50% underestimate the BP %	N/A	N/A	B=H	Non-US population.
PICOT1	122	added	Hicks LS, Sequist TD, Ayanian JZ, Shaykevich S, Fairchild DG, Orav EJ, Bates DW	4	4.4	2008	Impact of computerized decision support on blood pressure management and control: a randomized controlled trial	J Gen Intern Med	Hicks LS, Sequist TD, Ayanian JZ, Shaykevich S, Fairchild DG, Orav EJ, Bates DW. Impact of computerized decision support on blood pressure management and control: a randomized controlled trial. J Gen Intern Med. 2008 Apr;23(4):429-41	A	RCT	Adults	N=2027	Adults receiving hypertension care at one of 14 primary care practices; ethnically and racially diverse patient population	Unknown (EMR data)	Use of computerized decision support (CDS) system by providers	Usual care	Rates of blood pressure control.	Unknown	1. CDS to physicians about hypertension treatment guidelines increases recommended medication prescribing compared to usual care. 2. However, greater adherence to recommended prescribing practices did not result in improved blood pressure control. 3. Minorities were more likely to have poorly controlled hypertension despite being more likely to receive a guideline-recommended drug	Knowledge regarding the potential impact of CDS on recommended treatment and BP control.		B=H	Adults only. Unsure how these results translate to a pediatric patient population.
PICOT1	123	added	Samal L, Linder JA, Lipsitz SR, Hicks LS	4	4.4	2011	Electronic health records, clinical decision support, and blood pressure control	Am J Manag Care	Samal L, Linder JA, Lipsitz SR, Hicks LS. Electronic health records, clinical decision support, and blood pressure control. Am J Manag Care. 2011 Sep;17(9):626-32	C	Cross-sectional	Adults	N= 20,924 visits (by adults)	Primary care visits; Data from the National Ambulatory Medical Care Survey (NAMCS)	Unknown	N/A	N/A	N/A	Unknown	Improved BP control is associated with electronic health record (EHR) and computerized decision support (CDS) tool use.	Knowledge of the potential benefits of EHR and CDS		B=H	Adults only. Unsure how these results translate to a pediatric patient population.
PICOT1	124	added	Heymann AD, Hoch I, Valinsky L, Shalev V, Silber H, Kokia E	4	4.4	2005	Mandatory computer field for blood pressure measurement improves screening	Fam Pract	Heymann AD, Hoch I, Valinsky L, Shalev V, Silber H, Kokia E. Mandatory computer field for blood pressure measurement improves screening. Fam Pract. 2005 Apr;22(2):168-9	C	Cross-sectional study	Adults	N=53,000 patients	Data from 9 clinics	Unknown	N/A	N/A	N/A	Unknown	73% greater likelihood of having a BP documented after the introduction of a compulsory field within the HER	Knowledge of the potential benefits of a compulsory field within the HER
PICOT1	125	added	Brady TM, Neu AM, Miller ER 3rd, Appel LJ, Siberry GK, Solomon BS	4	4.4	2015	Real-time electronic medical record alerts increase high blood pressure recognition in children	Clin Pediatr	Brady TM, Neu AM, Miller ER 3rd, Appel LJ, Siberry GK, Solomon BS. Real-time electronic medical record alerts increase high blood pressure recognition in children. Clin Pediatr (Phila). 2015 Jun;54(7):667-75	C	Cross-sectional	Children	N= 1305 encounters	Data from EHR from a single practice	1- Oscillometric	N/A	N/A	N/A	Unknown	Use of HER alert system results in increased recognition of elevated BP from 12.5% to 42%	Knowledge of the benefits of an alert system for recognizing abnormal BP		B>H	Single center study.
PICOT1	126	added	Romano MJ, Stafford RS	4	4.4	2011	Electronic health records and clinical decision support systems: impact on national ambulatory care quality	Arch Intern Med	Romano MJ, Stafford RS. Electronic health records and clinical decision support systems: impact on national ambulatory care quality. Arch Intern Med. 2011 May 23;171(10):897-903	C	Cross-sectional	Health care visits	N= 255,402 (patient visits)	Data from National Ambulatory Medical Care Survey (NAMCS, 2005–2007) and the National Hospital Ambulatory Medical Care Survey (NHAMCS, 2005–2007)	Unknown	N/A	N/A	N/A	Unknown	There is no consistent association between EHRs and CDS and better quality			B<H
PICOT1/PICOT2	129	86/1	Flynn JT, Pierce CB, Miller ER 3rd, Charleston J, Samuels JA, Kupferman J, Furth SL, Warady BA	5, 11	4.5	2012	Reliability of resting blood pressure measurement and classification using an oscillometric device in children with chronic kidney disease	Journal of Pediatrics	Flynn JT, Pierce CB, Miller ER 3rd, Charleston J, Samuels JA, Kupferman J, Furth SL, Warady BA; Chronic Kidney Disease in Children Study Group. Reliability of resting blood pressure measurement and classification using an oscillometric device in children with chronic kidney disease. J Pediatr. 2012 Mar;160(3):434-440	C, C	Study on BP measurement device/method in CKD children and adolescents	Children	N=235	CKD	1	N/A	auscultation	SBP, DBP	no	oscillometric BPs do no sufficiently correlated with manual BP in CKD patients		Compared with auscultation, the oscillometric device significantly overestimated both SBP and DBP, leading to frequent misclassification of BP status	B<H	Measurement error: difference personel involved in making ausculatory measurements.
PICOT1	130	added	Kamath N, Goud BR, Phadke KD, Iyengar A	5	4.5	2012	Use of oscillometric devices for the measurement of blood pressure-comparison with the gold standard	Indian J Pediatr	Kamath N, Goud BR, Phadke KD, Iyengar A. Use of oscillometric devices for the measurement of blood pressure-comparison with the gold standard. Indian J Pediatr. 2012 Sep;79(9):1230-2	C	Cross-sectional study, validation	Children	N= 1489	Children 5-16 years of age; living in the slums of Bangalore	1-Oscillometric and 4- Mercury sphygmomanometer	N/A	N/A	N/A	Yes- 3 measurements	Automated BP recording does not accurately measure the blood pressure as compared to the gold standard (using only the Datascope Duo oscillometric device)	Comparison of BPs obtained via oscillometric versus manual measurement	Only evaluated 1 device	B<H	Single center study.
PICOT1	132	47	Chiolero A, Paradis G, Lambert M	5	4.5	2010	Accuracy of oscillometric devices in children and adults	Blood Press	Chiolero A, Paradis G, Lambert M. Accuracy of oscillometric devices in children and adults. Blood Press. 2010 Aug;19(4):254-9	A/SD and C/JD; C (JF)	Cross-sectional study, validation	Children, adolescents, and adults	N= 30 children; N= 40 adults	Canadian population; Quality cohort study participants	1-Oscillometric and 4- Mercury sphygmomanometer	N/A	auscultation	validation of Dinamap XL	Yes- 5 measurements	1. In children and adults, the oscillometric device Dinamap XL, model CR9340 was not accurate enough to be recommended, based on criteria close to those of the International validation protocol of the European Society of Hypertension. 2. However, on average, comparable readings for systolic BP were obtained with the oscillometric and auscultatory methods in children and adults	Validation of Dinamap XL oscillometric device in children	OBP may be less accurate in adults	B<H	Limited sample size. Sequential versus simultaneous measurements--> unequal reading; Lower reliability; Single person assessing BP; Not hypertensive population.
PICOT1	133	44	Chio SS, Urbina EM, Lapointe J, Tsai J, Berenson GS	5	4.5	2011	Korotkoff sound versus oscillometric cuff sphygmomanometers: Comparison between auscultatory and DynaPulse blood pressure measurements	Journal of the American Society of Hypertension	Chio SS, Urbina EM, Lapointe J, Tsai J, Berenson GS. Korotkoff sound versus oscillometric cuff sphygmomanometers: comparison between auscultatory and DynaPulse blood pressure measurements. J Am Soc Hypertens. 2011 Jan-Feb;5(1):12-20.	A/SD and B/EU	Cross-sectional, validation	Adults	N= 803	Adults, Bogalusa Heart Study	1- Oscillometric (DynaPulse)	N/A	mercury sphygmomanometer	validation of Dyna Pulse	yes	poor agreement with mercury	OBP eliminates reliance on hearing the K1, K4, K5 sounds	DynaPulse overestimates SBP (9mmHg higher than K1) in the clinic setting	B=H	Adults only.
PICOT1	134	added	Eliasdottir SB, Steinthorsdottir SD, Indridason OS, Palsson R, Edvardsson VO	5	4.5	2013	Comparison of aneroid and oscillometric blood pressure measurements in children	J Clin Hypertens (Greenwich)	Eliasdottir SB, Steinthorsdottir SD, Indridason OS, Palsson R, Edvardsson VO. Comparison of aneroid and oscillometric blood pressure measurements in children. J Clin Hypertens (Greenwich). 2013 Nov;15(11):776-83	C	Cross-sectional	Children	N= 979	Children, 9 to 10 years of age; Iceland	1-Oscillometric and 4- Aneroid sphygmomanometer	N/A	N/A	N/A	Yes- 4 measurements	1. Although the frequency of elevated BP did not differ between the 2 methods, the agreement between oscillometric and aneroid monitors in detecting elevated SBP was limited (Kappa statistic: 0.39); 2. Of the 154 patients (15.7%) who had elevated oscillometric BP, oinly 69 (44.8%) had elevated BP using the aneroid device; 3. The oscillometric device tends to underestimate the DBP. 4. Aside from t…	Comparison of BPs obtained via oscillometric versus manual measurement	Results limited to comparison of 2 devices.	B>H	Limted to Accoson Green Light aneroid BP monitor and the IntelliVue MP50 Patient monitor.
PICOT1	135	279	Urbina EM, Khoury PR, McCoy CE, Daniels SR, Dolan LM, Kimball TR	5	4.5	2015	Comparison of mercury sphygmomanometry blood pressure readings with oscillometric and central blood pressure in predicting target organ damage in youth	Blood Pressure Monitoring	Urbina EM, Khoury PR, McCoy CE, Daniels SR, Dolan LM, Kimball TR. Comparison of mercury sphygmomanometry blood pressure readings with oscillometric and central blood pressure in predicting target organ damage in youth. Blood Press Monit. 2015 Jun;20(3):150-6.	B	Cross-sectional	Children, adolescents, and adults	N=677	obese, diabetes, minorities	1	N/A	N/A	Mercury (BPm), Oscillometric (BPo), and Central BP (BPc) were compared. Also measured adiposity, lab values, left ventricular mass, carotid intima-media thickness and pulse wave velocity.	Yes	BPo: oscillometric BP, BPm: manual BP/mercury, BPc= central BP measured using a tonometer. Prevalence of HT BPo (16%) > BPm (11%) > BPc (9%). BPm most consistent in showing graded increase in LVM & PWV from NT to PreHTN to HTN & had superior ROC curves in predicting increased LVM, PWV, cIMT (Logistic regression, concordance statistic). Mercury BP measures should remain gold standard for evaluatio…	yes; Knowledge of the utility of different BP measurement techniques in predicting subclinical TOD in adolescents and young adults	No	B>H	Single day of measurements. BP not measured over time for study.
PICOT1	136	added	Negroni-Balasquide X, Bell CS, Samuel J, Samuels JA	5	4.5	2016	Is one measurement enough to evaluate blood pressure among adolescents? A blood pressure screening experience in more than 9000 children with a subset comparison of auscultatory to mercury measurements	J Am Soc Hypertens	Negroni-Balasquide X, Bell CS, Samuel J, Samuels JA. Is one measurement enough to evaluate blood pressure among adolescents? A blood pressure screening experience in more than 9000 children with a subset comparison of auscultatory to mercury measurements. J Am Soc Hypertens. 2016 Feb;10(2):95-100	B	Retropsective review of several cross-sectional studies	Children	N= 9870	Both genders, multi-ethnic	1- OBP	N/A	N/A	BP measurements over time	Yes- 4 measurements	In general oscillometric assessments of SBP and DBP declineover time with the biggest decrease occuring between the first and second measurement	Knowledge of the importance of repeated measure	None reported	B>H	No repeated manual measurements.
PICOT1	137	added	Leblanc MÉ, Croteau S, Ferland A, Bussières J, Cloutier L, Hould FS, Biertho L, Moustarah F, Marceau S, Poirier P	N/A	4.6	2013	Blood pressure assessment in severe obesity: validation of a forearm approach	Obesity	Leblanc MÉ, Croteau S, Ferland A, Bussières J, Cloutier L, Hould FS, Biertho L, Moustarah F, Marceau S, Poirier P. Blood pressure assessment in severe obesity: validation of a forearm approach. Obesity (Silver Spring). 2013 Dec;21(12):E533-41	C	Cross-sectional	Adults	N= 51 persons (N=1285 measurements)	Severely obese persons with a BMI > 40kg/m2 or > 35kg/m2 + comorbidities; s/p biliopancreatic diversion with duodenal switch surgery	3- Oscillometric (forearm), 4- intra-arterial	N/A	N/A	N/A	Yes	1.. Good correlation between intra-arterial and forearm, non-invasive blood pressure assessment. 2. Compared to intra-arterial methods, overall trend in all patients is that the forearm method overestimates systolic and underestimates diastolic blood pressure.	Knowledge of the correlation between intra-arterial and non-invasive, oscillometric device ((Welch Allyn, Life sign monitor 5200 Series NY)	None reported.	B>H	Limited to assessment of a single device.
PICOT1	138	added	Altunkan S, Genç Y, Altunkan E	N/A	4.6	2007	A comparative study of an ambulatory blood pressure measuring device and a wrist blood pressure monitor with a position sensor versus a mercury sphygmomanometer	Eur J Intern Med	Altunkan S, Genç Y, Altunkan E. A comparative study of an ambulatory blood pressure measuring device and a wrist blood pressure monitor with a position sensor versus a mercury sphygmomanometer. Eur J Intern Med. 2007 Mar;18(2):118-23	C	Cross-sectional	Adults	N=139	Adults	1- Wrist, 2-ABPM, 4- oscillometric	N/A	N/A	N/A	Yes	The accuracy and precision of a wrist BP monitor with a position sensor (Omron 637IT), ambulatory BP measuring monitor (ABPM; Nissei DS-250) and of the mercury sphygmomanometer are comparable. Mean systolic BP measured by the mercury device was 133.2±18.4 mmHg and the diastolic BP was 85.4±12.5 mmHg, whereas the digital device measured systolic BP as 135.7±17.2 mmHg and diastolic BP as 87.0±12.5 …	Knowledge of the correlation in BP between oscillometric, ABPM and mercury		B>H	Adults.
PICOT1	139	276	Uen S, Fimmers R, Brieger M, Nickenig G, Mengden T.	N/A	4.6	2009	Reproducibility of wrist home blood pressure measurement with position sensor and automatic data storage	BMC cardiovascular disorders	Uen S, Fimmers R, Brieger M, Nickenig G, Mengden T. Reproducibility of wrist home blood pressure measurement with position sensor and automatic data storage. BMC Cardiovasc Disord. 2009 May 27;9:20.	cbaker-s/ Rea-C	Prospective cohort study	Adults (included reference due to limited studies)	N= 97	None	4-wrist	N/A	office BP, ABPM	Compare reproducibility of office BP, wrist home blood pressure & ABPM measurement devices	No- only 2 measurements	Home BP shows the least variability both as measured by SD of mean differences and was superior to office BP & ABPM. Office & ABPM had statistically the same variability. The correlation of ABPM to LVMI was higher than office BP and was statistically the same as for home BP.	Yes	No	B>H	Adult population.
PICOT1	140	added	Fania C, Benetti E, Palatini P	N/A	4.6	2015	Validation of the A&D BP UB-543 wrist device for home blood pressure measurement according to the European Society of Hypertension International Protocol revision 2010	Blood Press Monit	Fania C, Benetti E, Palatini P. Validation of the A&D BP UB-543 wrist device for home blood pressure measurement according to the European Society of Hypertension International Protocol revision 2010. Blood Press Monit. 2015 Aug;20(4):237-4	C	Validation study	Adults	N=33	Iltalian adults	1- Wrist (with an arm position sensor), 4- Mercury sphygomonometer	N/A	mercury sphygmomanometer	Comparison of blood pressure results between the wrist device and the mercury sphygomonemeter	Yes- 4 measurements	UB-543 BP device proved to be accurate across the entire BP range and was unrelated to participants’ age, sex, BP level, and arm size.	Validation of a wrist device (according to European standards) for assessing blood pressure	Small sample size.	B=H	Not studied in children.
PICOT1	141	added	Kang YY, Chen Q, Li Y, Wang J	N/A	4.6	2016	Validation of the SCIAN LD-735 wrist blood pressure monitor for home blood pressure monitoring according to the European Society of Hypertension International Protocol revision 2010	Blood Press Monit	Kang YY, Chen Q, Li Y, Wang JG. Validation of the SCIAN LD-735 wrist blood pressure monitor for home blood pressure monitoring according to the European Society of Hypertension International Protocol revision 2010. Blood Press Monit. 2016 Aug;21(4):255-8	C	Validation study	Adults	N=33	Chinese adults	1- Wrist (with an arm position sensor), 4- Mercury sphygomonometer	N/A	mercury sphygmomanometer	Comparison of blood pressure results between the wrist device and the mercury sphygomonemeter	Yes- 9 measurements	Validation study comparing the SCIAN LD-735 device and mercury sphygomonometer. Average (± SD) of the device–observer differences was − 0.8 ± 3.6 (P =0.07) and − 0.4 ± 3.5 mmHg (P = 0.23) for systolic and diastolic blood pressure, respectively. The SCIAN wrist blood pressure monitor LD-735 passed the requirements of the International Protocol revision 2010 for blood pressure measurement at home i…	Validation of a wrist device (according to European standards) for assessing blood pressure	Small sample size.	B=H	Not studied in children.
PICOT1	142	added	Xie P, Wang Y, Xu X, Huang F, Pan J	N/A	4.6	2015	Validation of the Pangao PG-800A11 wrist device assessed according to the European Society of Hypertension and the British Hypertension Society protocols	Blood Press Monit	Xie P, Wang Y, Xu X, Huang F, Pan J. Validation of the Pangao PG-800A11 wrist device assessed according to the European Society of Hypertension and the British Hypertension Society protocols. Blood Press Monit. 2015 Apr;20(2):108-11	C	Validation study	Adults	N=85	Chinese adults	1- Wrist (with an arm position sensor), 4- Mercury sphygomonometer	N/A	mercury sphygmomanometer	Comparison of blood pressure results between the wrist device and the mercury sphygomonemeter	No- 2 measurements	Pangao PG-800A11 automated wrist BP monitor fulfilled all criteria of ESH-IP revision 2010 and obtained an A/A grade according to the criteria of the BHS protocol, which showed BP measurement accuracy for clinical use and self-measurement in a general population	Validation of a wrist device (according to European standards) for assessing blood pressure	Small sample size.	B=H	Not studied in children.
PICOT1	143	added	Zweiker R, Schumacher M, Fruhwald FM, Watzinger N, Klein W	N/A	4.6	2000	Comparison of wrist blood pressure measurement with conventional sphygmomanometry at a cardiology outpatient clinic	J Hypertens	Zweiker R, Schumacher M, Fruhwald FM, Watzinger N, Klein W. Comparison of wrist blood pressure measurement with conventional sphygmomanometry at a cardiology outpatient clinic. J Hypertens. 2000 Aug;18(8):1013-8	C	Validation study	Adults	N= 333	Austrian adults in an outpatient clinic: 57% with coronary artery disease, 14% with cardiomyopathy, 29% other	1- Wrist (with an arm position sensor), 4- Mercury sphygomonometer	N/A	mercury sphygmomanometer	Comparison of blood pressure results between the wrist device and the mercury sphygomonemeter	Unknown	Wrist BP monitors do accurately reflect blood pressure: Mean blood pressure measured conventionally was significantly lower than those readings obtained by the wrist device (137+/- 20)/ (80+/-11 mmHg); 153 +/- 28/(87+/-18 mmHg); P <0.001 and P <0.001). The mean difference was 16 +/-25/6+/- 17 mmHg	N/A	inaccurate BP measurement using the wrist device	B<H	24% of participants excluded due to >5 mm Hg variation in blood pressure.
PICOT1	144	added	Altunkan S, Yildiz S, Azer S	N/A	4.6	2002	Wrist blood pressure-measuring devices: a comparative study of accuracy with a standard auscultatory method using a mercury manometer	Blood Press Monit	Altunkan S, Yildiz S, Azer S. Wrist blood pressure-measuring devices: a comparative study of accuracy with a standard auscultatory method using a mercury manometer. Blood Press Monit. 2002 Oct;7(5):281-4	C	Validation study	Adolescents and Adults	N= 152	Adolescents and adults. 16-83 years of age; Outpatient hypertension clinic.	1- compared two wrist blood pressure-measuring devices, the Omron RX and the Nissei WS-310, 4- Mercury sphygomonometer	N/A	mercury sphygmomanometer	Comparison of blood pressure results between the wrist device and the mercury sphygomonemeter	No- 2 measurements	1. There was no difference between two wrist monitors in terms of the AAMI accuracy criteria – a mean difference within 5 mmHg and a standard deviation of the differences of 8 mmHg or less. 2. Both devices investigated in this study are comfortable and easy to use by patients. Although they are reliable for measuring DBP according to the British Hypertension Society (BHS) and Association for the …	Comparison of BPs obtained via oscillometric versus manual measurement	Wrist devices provided less accurate SBP measurements	B<H	Adult study.
PICOT1	145	added	Palatini P, Longo D, Toffanin G, Bertolo O, Zaetta V, Pessina AC	N/A	4.6	2004	Wrist blood pressure overestimates blood pressure measured at the upper arm	Blood Press Monit	Palatini P, Longo D, Toffanin G, Bertolo O, Zaetta V, Pessina AC. Wrist blood pressure overestimates blood pressure measured at the upper arm. Blood Press Monit. 2004 Apr;9(2):77-81	C	Validation study	Adults	N= 85	Italian adults	1- Wrist (with an arm position sensor), 4- Mercury sphygomonometer	N/A	mercury sphygmomanometer	Comparison of blood pressure results between the wrist device and the mercury sphygomonemeter	Yes- 3 measurements	1. Blood pressure measured at the wrist consistently overestimated blood pressure taken at the arm with a mean ( ± SD) discrepancy of 8.2 ± 9.7/9.2 ± 6.4 mmHg	N/A	Wrist devices overestimate the blood pressure	B<H	Adult study.
PICOT1	146	added	Stergiou GS, Christodoulakis GR, Nasothimiou EG, Giovas PP, Kalogeropoulos PG	4.6	4.6	2008	Can validated wrist devices with position sensors replace arm devices for self-home blood pressure monitoring? A randomized crossover trial using ambulatory monitoring as reference	Am J Hypertens	Stergiou GS, Christodoulakis GR, Nasothimiou EG, Giovas PP, Kalogeropoulos PG. Can validated wrist devices with position sensors replace arm devices for self-home blood pressure monitoring? A randomized crossover trial using ambulatory monitoring as reference. Am J Hypertens. 2008 Jul;21(7):753-8	B	Randomized cross over study	Adults	N= 27	Adult individuals who were referred to the outpatient hypertension clinic for elevated BP, Greece	1- validated wrist devices (wrist-HBP, Omron R7 with position sensor) with those taken using arm devices (arm-HBP, Omron 705IT); 2- ABPM (Spacelabs)	N/A	ABPM	1. difference between the average values of wristmonitored and arm-monitored HBP, and the s.d.) of this difference; 2. s.d. for the average value of wrist-monitored HBP compared to that of the average value of arm-monitored HBP; 3. association of awake ABP with average wrist monitored HBP as compared to its association with arm monitored HBP	Yes- 18 measurements	Validated wrist devices with position sensors might often lead to significant underestimation of BP, particularly systolic BP		Wrist devices do not provide accurate BP recordings	B<H	Adult study.
PICOT1	147	added	Khoshdel AR, Carney S, Gillies A	N/A	4.6	2010	The impact of arm position and pulse pressure on the validation of a wrist-cuff blood pressure measurement device in a high risk population	Int J Gen Med	Khoshdel AR, Carney S, Gillies A. The impact of arm position and pulse pressure on the validation of a wrist-cuff blood pressure measurement device in a high risk population. Int J Gen Med. 2010 Apr 8;3:119-25	C	Prospective validation study	Adults	N=50	Unreported demographic	4- Wrist BP (obtained at various positions)	N/A	mercury measurements	BP via wrist device	Yes 5 measurements	Wrist monitors underestimat BP. Of the offered positions, DESK, SHOULDER or HORIZONTAL, DESK offered the least measurement difference compared to mercury. SHOULDER provided the most reproducible measurements	Knowledge of the relationship between wrist an mercury measurements	Underestimation of BP using wrist measurement.	B<H	Small sample. Nonpediatric population. Non-US population.
PICOT1	148	added	Kikuya M, Chonan K, Imai Y, Goto E, Ishii M; Research Group to Assess the Validity of Automated Blood Pressure Measurement Devices in Japan	N/A	4.6	2002	Accuracy and reliability of wrist-cuff devices for self-measurement of blood pressure	J Hypertens	Kikuya M, Chonan K, Imai Y, Goto E, Ishii M; Research Group to Assess the Validity of Automated Blood Pressure Measurement Devices in Japan.. Accuracy and reliability of wrist-cuff devices for self-measurement of blood pressure. J Hypertens. 2002 Apr;20(4):629-38	C	Prosepectice validation study; cross over design	Adults	Variable	Japanese adults	4- Wrist BP	N/A	aneroid BP	BP	No	There was good inter-observer agreement for the auscultation method in each institute (systolic blood pressure (SBP), -0.1 +/- 2.8 mmHg; diastolic blood pressure (DBP), -0.1 +/- 2.6 mmHg, n= 498). The mean difference between auscultation and the device was minimal both in arm-cuff devices (mean difference for AC- 1, 2.2/1.9 mmHg, n =97 and for AC-2, 5.1/2.9 mmHg, n=136, SBP/DBP) and wrist-cuff de…	Knowledge of the correlation between wrist measurements and manual BP measurement	None reported	B>H	Comparison measurements of BPs in opposite arms.
PICOT1	149	added	Westhoff TH, Schmidt S, Meissner R, Zidek W, van der Giet M	N/A	4.6	2009	The impact of pulse pressure on the accuracy of wrist blood pressure measurement	J Hum Hyperten	Westhoff TH, Schmidt S, Meissner R, Zidek W, van der Giet M. The impact of pulse pressure on the accuracy of wrist blood pressure measurement. J Hum Hypertens. 2009 Jun;23(6):391-5	C	Prospective cohort, validation study	Adults	N=33	German adults; no ethnicity data provided	4- oscillometric wrist (and control mercury sphyngomanometer)	N/A	mercury measurements	BP	Yes- at least 3 measurements	The systolic blood pressure bias depends on pulse pressure. Increased arterial stiffness may impair the accuracy of oscillometric blood pressure measurement at the wrist	Knowledge of the impact of increased pulse pressure on BP assessment via wrist measurement	Overestimate of BP using wrist devices	B<H	No children. We know that pulse pressure increases with age.
PICOT1	150	added	Deutsch C, Krüger R, Saito K, Yamashita S, Sawanoi Y, Beime B, Bramlage P	N/A	4.6	2014	Comparison of the Omron RS6 wrist blood pressure monitor with the positioning sensor on or off with a standard mercury sphygmomanometer	Blood Press Monit	Deutsch C, Krüger R, Saito K, Yamashita S, Sawanoi Y, Beime B, Bramlage P. Comparison of the Omron RS6 wrist blood pressure monitor with the positioning sensor on or off with a standard mercury sphygmomanometer. Blood Press Monit. 2014 Oct;19(5):306-13	C	Prospective cohort, validation study	Adults	N= 95	German adults; no ethnicity data provided	4- oscillometric wrist (and control mercury sphyngomanometer)	N/A	mercury measurements	BP	Yes- 16 sequential measurements (with arm position confirmed)	Wrist measurements can be a reliable method of BP asssessment (1-0 to +10mmHg) if corrent wrist positioning is confirmed	Knowledge of the potential use of wrist measurement.	Noe reported	B>H	Adults only. No consideration for pulse pressure measurements.
PICOT1	151	added	Yarows SA	N/A	4.6	2004	Comparison of the Omron HEM-637 wrist monitor to the auscultation method with the wrist position sensor on or disable	Am J Hypertens	Yarows SA. Comparison of the Omron HEM-637 wrist monitor to the auscultation method with the wrist position sensor on or disabled. Am J Hypertens. 2004 Jan;17(1):54-8. Erratum in: Am J Hypertens. 2004 Apr;17(4):383	C	Prospective cohort, validation study	Adults	N= 44	Single practice. No demographic datat provided	4- oscillometric wrist (and control mercury sphyngomanometer)	N/A	mercury measurements	BP	Yes- at least 5-6 sequentional measurements	Comparison of the Omron HEM-637 wrist monitor to the auscultation method with the wrist position sensor on or disabled. % measurements within 3mmHg of the mercury measuremnt improved with use of a sensor.	Knoweledge of the potential benefit of sensor use in BP assessment via use of a wrist device	Limits of wrist measurements	B>H	Adults only.
PICOT1	152	added	Menezes AM, Dumith SC, Noal RB, Nunes AP, Mendonça FI, Araújo CL, Duval MA, Caruso PE, Hallal PC	N/A	4.6	2010	Validity of a wrist digital monitor for blood pressure measurement in comparison to a mercury sphygmomanometer	Arq Bras Cardiol	Menezes AM, Dumith SC, Noal RB, Nunes AP, Mendonça FI, Araújo CL, Duval MA, Caruso PE, Hallal PC. Validity of a wrist digital monitor for blood pressure measurement in comparison to a mercury sphygmomanometer. Arq Bras Cardiol. 2010 Mar;94(3):345-9, 365-70	C	Prospective cohort, validation study	Children	N =120	Brazilian children	4- wrist BP, ;mercury sphyngomanometer	N/A	mercury measurements	BP	No- 2 measurements	Sensitivity of 81% between the wrist and mercury measurements; Specificity of 89%. Kappa statistic of 0.62.	Good agreement between wrist oscillometric and mercury measurements	None reported	B>H	Non-US population.
PICOT1	153	added	Wankum PC, Thurman TL, Holt SJ, Hall RA, Simpson PM, Heulitt MJ	N/A	4.6	2004	Validation of a noninvasive blood pressure monitoring device in normotensive and hypertensive pediatric intensive care patients	J Clin Monit Comput	Wankum PC, Thurman TL, Holt SJ, Hall RA, Simpson PM, Heulitt MJ. Validation of a noninvasive blood pressure monitoring device in normotensive and hypertensive pediatric intensive care patients. J Clin Monit Comput. 2004 Aug;18(4):253-63	C	Prospective cohort, validation study	Children	N= 20 (2015 data points)	Children 1 month to 18 years in the ICU	4- wrist BP device, interartial line	NA	artieral BP	BP	Yes	Good correlation between interarterial BP and wrist BP masurement (0.94 SBP, 0.94 DBP, 0.94 MBP)	Knowledge of the potential for good correlation between interarerial (invasive measurment) pressure and wrist oscillometric BP	N=8 patients (40%), unable to assess BP due to small wrist size, hematoma on the wrist, severe wrist contraction, myoclonic jetks	B>H	Single device (Vasotec Medwave device).
PICOT1	154	added	Cua CL, Thomas K, Zurakowski D, Laussen PC	N/A	4.6	2005	A comparison of the Vasotrac with invasive arterial blood pressure monitoring in children after pediatric cardiac surgery	Anesth Analg	Cua CL, Thomas K, Zurakowski D, Laussen PC. A comparison of the Vasotrac with invasive arterial blood pressure monitoring in children after pediatric cardiac surgery. Anesth Analg. 2005 May;100(5):1289-94	C	Prospective cohort, validation study	Children	N=16	Single center, no race or ethnicity informatin provided; age 7 to 15 years	4- wrist BP device, radial artery measurement	N/A	aterial BP	BP	Yes	Correlation coefficient between artrial and oscillometric measurements: 0.63 to 0.97 for SBP, 0.45 to 0.98 for DBP, 0.37 to 0.97 for MBP	Knowledge of reasonable correlation between arterial and oscillometrically acquired measurements	None reported	B>H	Small sample size.
PICOT2	157	63	Díaz LN, Garin EH	6	4.7	2007	Comparison of ambulatory blood pressure and Task Force criteria to identify pediatric hypertension	Pediatric nephrology	Díaz LN, Garin EH. Comparison of ambulatory blood pressure and Task Force criteria to identify pediatric hypertension. Pediatr Nephrol. 2007 Apr;22(4):554-8.	C	Retrospective study (comparions of US and Europena ABPM	Children	N=169	Children with hypertension who underwent ABPM between 1993 and 2004 at the University of South Florida Medical Clinics	2-ABPM	N/A	US ABPM criteria (versus European criteria)	ABPM measurements	N/A- ABPM	The number of hypertensive patients was significantly higher using ABPM compared to Task Force criteria when patients with BP load ≥50% were evaluated (p≤0.01)	Knowledge of differences in ABPM results	Lack of yet to be produced normative and validated ABPM criteria in American children	B=H
PICOT1	158	231	Salice P, Ardissino G, Barbier P, Bacà L, Vecchi DL, Ghiglia S, Colli AM, Galli MA, Marra G, Testa S, Edefonti A, Magrini F, Zanchetti A	6	4.7	2010	Age-dependent differences in office (OBP) vs ambulatory blood pressure monitoring (ABPM) in hypertensive children and adolescents	Journal of hypertension	Salice P, Ardissino G, Barbier P, Bacà L, Vecchi DL, Ghiglia S, Colli AM, Galli MA, Marra G, Testa S, Edefonti A, Magrini F, Zanchetti A. Differences between office and ambulatory blood pressures in children and adolescents attending a hospital hypertension clinic. J Hypertens. 2013 Nov;31(11):2165-75.	B/B	Retrospective cohort study	Children	N= 433	Children and adolescents aged 4-18 years, referred to a hospital clinic in Italy	1 and 2	N/A	OBP vs ABP	Ofifce BP and ABPM	yes, although 2 BP measurements for each test	Age related differences in correlation between office BP and ABPM. OBP lower than ABP in younger children (4-10), but not in older (11-18). OBP also lower in normotensive pts but higher than ABP in HTN pts.	Knowledge of the relationshiop between office BP and ABPM	none reported	B>H	Non-US study.
PICOT1	159	254	Stergiou GS, Alamara CV, Salgami EV, Vaindirlis IN, Dacou-Voutetakis C, Mountokalakis TD	6, 10	4.7, 4.9	2005	Reproducibility of home and ambulatory blood pressure in children and adolescents	Blood pressure monitoring	Stergiou GS, Alamara CV, Salgami EV, Vaindirlis IN, Dacou-Voutetakis C, Mountokalakis TD. Reproducibility of home and ambulatory blood pressure in children and adolescents. Blood Press Monit. 2005 Jun;10(3):143-7.	B	Cross Sectional	Children and adolescents	N=160 (Bogalusa heart study)	Children and adolescents ages 8 - 17 years referred for elevated clinic blood pressure. 9 boys, 7 girls. Greece. Limited studies in US; 7 obese, 3 overweight, 6 normal weight. 8 classified as hypertensive, 3 high-normal, 5 normotensive.	4 Clinic blood pressure (CBP) measured in 3 visits over 3 weeks, home blood pressure (HBP) measured on 3 routine school days per week for 2 weeks (AM and PM measurements), and ambulatory blood pressure (ABP) at 20 minute intervals for 24 hours. All of the above measurements were repeated 8 weeks later.	N/A	ABPM	BP: home versus ABPM	Yes; 3-measurements	The reproducibility of HBP is superior to that of CBP and close to that of ABP. Systolic HBP was significantly lower than CBP (by 8.6/9.1 mmHg in the initial/second monitoring session, P < 0.01) and daytime ABP (by 12.1/15.5 mmHg, P < 0.001). Daytime ABP was higher than CBP, reaching statistical significance only in the second session (mean difference 3.5/6.4mmHg in the initial/second monitoring …	HBP can be used to assess BP in children if validated device is used; measurements are repeated.	Higher reported BP for ABPM.	B>H	Non-US population. Small sample size.
PICOT1	160	169	Li Z, Snieder H, Harshfield GA, Treiber FA, Wang X	6	4.7	2009	A 15-year longitudinal study on ambulatory blood pressure tracking from childhood to early adulthood	Hypertension research : official journal of the Japanese Society of Hypertension	Li Z, Snieder H, Harshfield GA, Treiber FA, Wang X. A 15-year longitudinal study on ambulatory blood pressure tracking from childhood to early adulthood. Hypertens Res. 2009 May;32(5):404-10.	A/A-BF	observational (15 yr longtiduinal)	Children and adolescents	N= 547 (N=295 european americans, N= 252 African Americans)	minorities (African American)	2	N/A	office, Dinamap	tracking ability of office BP and ambulatory blood pressure. tracking stability of BP variability and nocturnal BP drop	yes	24 hr readings tracked better than office readings; males had higher SBP, BP variability, and pusle pressure; blacks had higher SBP, DBP values. European white had higher prevalence of nocturnal BP dippers	use of ABMP monitoring and entire 24 hr BP can predict future BP
PICOT2	161	157	Seeman T, Palyzová D, Dusek J, Janda J	6	4.7, Table 12	2005	Reduced nocturnal blood pressure dip and sustained nighttime hypertension are specific markers of secondary hypertension	The Journal of pediatrics	Seeman T, Palyzová D, Dusek J, Janda J. Reduced nocturnal blood pressure dip and sustained nighttime hypertension are specific markers of secondary hypertension. J Pediatr. 2005 Sep;147(3):366-71	C	Rtetrospective cohort study	Children	N= 145	Untreated hypertensive children who underwent ABPM monitoring at a single institution; Mean age 11-15years ; all White. Stage 1 and Stage 2 HTN by ABPM.	2-ABPM	N/A	N/A	Demographic features, BP	Yes- ABPM	Reduced nocturnal dipping on ABPM was more likely to be associated with secondary causes of HTN. The specificity of non dipping phenomenonon for predicting secondary HTN was 89% for SBP and 100% for DBP. The thresholds of nocturnal BP dip for predicting the presence of secondary hypertension with 100% sensitivityand the best sensitivity is <5% for SBP and <13% for DBP.	Knowledge of the importance of reduced nocturnal dipping on BP and its association with Stage 2 versus Stage 1 hypertension	N/A	B>H	Study design. Sample size.
PICOT1	162	38	Bjelakovic B, Jaddoe VW, Vukomanovic V, Lukic S, Prijic S, Krstic M, Bjelakovic L, Saranac L, Velickovic A	6	4.7	2015	The relationship between currently recommended ambulatory systolic blood pressure measures and left ventricular mass index in pediatric hypertension	Current hypertension reports	Bjelakovic B, Jaddoe VW, Vukomanovic V, Lukic S, Prijic S, Krstic M, Bjelakovic L, Saranac L, Velickovic A. The relationship between currently recommended ambulatory systolic blood pressure measures and left ventricular mass index in pediatric hypertension. Curr Hypertens Rep. 2015 Apr;17(4):534.	B B/ AC	Cross-sectional survey	Children	N= 102	Children referred for suspected HTN	2-ABPM	N/A	N/A	LVMI	yes	BMI and not ABPM measures of SBP, DBP or load correlated with LVMI in children	BMI more than BP is associated with increased LVMI	Other factors, aside from ambulatory blood pressure may be more important for determining LVMI	B=H	Small sample.
PICOT1/PICOT2	163	40/217	Brady TM, Fivush B, Flynn JT, Parekh R	6	4.7	2008	Ability of blood pressure to predict left ventricular hypertrophy in children with primary hypertension	The Journal of pediatrics	Brady TM, Fivush B, Flynn JT, Parekh R. Ability of blood pressure to predict left ventricular hypertrophy in children with primary hypertension. J Pediatr. 2008 Jan;152(1):73-8, 78.e1.	B/ JD - C D/EO B/ AC	Cross-sectional	Children	N=184	Obese, minorities; Children, 3 to 20 years; referred to nephrology clinic for an initial diagnosis of hypertension (excluded patients with secondary hypertension)	1, 2, 4 (aneroid)	N/A	no LVH	LVH by echocardiogram	Unknown for oscillometric/aneroid BP; N/A- ABPM	There was no difference in casual systolic or diastolic BP index in children with hypertension who had LVH and children with hypertension without LVH. Children with systolic or diastolic BP loads > or = 50% were no more likely to have LVH than children with loads < 50%. 67% of children w/ a new diagnosis of hypertension underwent an echcoardiogram within a few weeks after the initial clinic visit…		ABPM and casual BP are not predictive of LVH	B<H	Retrospective, missing data, not all had multiple casual BP readings, included white-coat.
PICOT1	164	186	McNiece KL, Gupta-Malhotra M, Samuels J, Bell C, Garcia K, Poffenbarger T, Sorof JM, Portman RJ	6	4.7	2007	Left ventricular hypertrophy in hypertensive adolescents: Analysis of risk by 2004 national high blood pressure education program working group staging criteria	Hypertension	McNiece KL, Gupta-Malhotra M, Samuels J, Bell C, Garcia K, Poffenbarger T, Sorof JM, Portman RJ; National High Blood Pressure Education Program Working Group. Left ventricular hypertrophy in hypertensive adolescents: analysis of risk by 2004 National High Blood Pressure Education Program Working Group staging criteria. Hypertension. 2007 Aug;50(2):392-5.	A/ JD - B	Retrospective pooed analysis (2 Cross-sectional studies performed between January 2002 and October 2005)	adolescents	N=163	Hispanic, Black, Obese. All of the hypertensive subjects had a history of casual BP readings ≥95th percentile for age, height, and gender compared with normative tables at the time of enrollment on 3 occasions before entry and were naïve to antihypertensive medications.	2 (ABPM) + 1 (OBP) or 4-manual BP for casual BP assessment (3 measurements, single visit)	N/A	none	LVH by M-mode echocardiography defined using the Devereux equation and LVMI >51g/m^2.7; fasting serum labs	yes	Among subjects with stage 1 HTN by casual blood pressure, 34% had white-coat HTN; Among subjects with stage 2 HTN by casual BP, 15% had white-coat HTN. Subjects with stage 2 HTN by casual measurement alone (odds ratio: 4.13; 95% CI: 1.04 to 16.48) and after 24-hour ambulatory confirmation (odds ratio: 7.23; 95% CI: 1.28 to 40.68) had increased odds for left ventricular hypertrophy. The risk for l…	ABPM reclassified 25.6% compared to casual BP. LVH risk correlated with ABPM classification		B>H	Although subjects had a history of elevated BP, causal BP category was determined based on 3 measurements averaged from single visit. LVH determined via use of the Devereux equation.
PICOT1	165	223	Richey PA, Disessa TG, Hastings MC, Somes GW, Alpert BS, Jones DP	6	4.7	2008	Ambulatory blood pressure and increased left ventricular mass in children at risk for hypertension	The Journal of pediatrics	Richey PA, Disessa TG, Hastings MC, Somes GW, Alpert BS, Jones DP. Ambulatory blood pressure and increased left ventricular mass in children at risk for hypertension. J Pediatr. 2008 Mar;152(3):343-8.	B	Cross-sectional	Children	N= 129	Children ages 6 to 18 years with a casual SBP or diastolic blood pressure (DBP) ≥90th percentile or a first-degree relative on antihypertensive therapy	2	N/A	LVMI	LVMI positively ocrrelated with 24-hour SBP and load	yes	LVMI is positively correlated with 24-hour systolic blood pressure (SBP) load, SBP index (SBPI) The odds ratio (OR) of having elevated LVMI increased by 54% for each incremental increase of SDS in 24-hour SSDS after controlling for race and BMI (OR = 1.54, unit = 1 SDS, CI = 1.1, 2.15, P = .011) and increases by 88% for each increase of 0.1 in BPI (OR = 1.88, CI = 1.03, 3.45, P = .04). Subjects w…	Knowledge of the relationship between ABPM and LVMI		B>H
PICOT1	166	53	Conkar S, Yılmaz E, Hacıkara Ş, Bozabalı S, Mir S	6	4.7	2015	Is Daytime Systolic Load an Important Risk Factor for Target Organ Damage in Pediatric Hypertension?	Journal of clinical hypertension (Greenwich, Conn.)	Conkar S, Yılmaz E, Hacıkara Ş, Bozabalı S, Mir S. Is Daytime Systolic Load an Important Risk Factor for Target Organ Damage in Pediatric Hypertension? J Clin Hypertens (Greenwich). 2015 Oct;17(10):760-6.	B/ JD - B	2? observational	Children and adolescents	N= 82	Turkish children; 6-17 years of age; Boys with suspected hypertension based on office BP measurements and considered hypertensive by ABPM were studied	2	N/A	none	retinopathy, LV mass indexed, cIMT, microalbuminuria, PWV	N/A- ABPM	Elevated BP load is associated with rates of end organ damage/TOD: 35.3% with hypertensive retinopathy, 25.6% with microalbuminuria, 15.8% with increased left ventricular mass index, 29.2% with increased carotid intima-media thickness (cIMT), 24.3% with high augmentation index (AIx), and 19.5% with high pulse wave velocity (PWV).	none	none	B>H	None obvious.
PICOT 1/3	173	555	ESCAPE Trial Group., Wühl E, Trivelli A, Picca S, Litwin M, Peco-Antic A, Zurowska A, Testa S, Jankauskiene A, Emre S, Caldas-Afonso A, Anarat A, Niaudet P, Mir S, Bakkaloglu A, Enke B, Montini G, Wingen AM, Sallay P, Jeck N, Berg U, Caliskan S, Wygoda S, Hohbach-ohenfellner K, Dusek J, Urasinski T, Arbeiter K, Neuhaus T, Gellermann J, Drozdz D, Fischbach M, Möller K, Wigger M, Peruzzi L, Mehls O…	23, 25	Table 12	2009	Strict blood-pressure control and progression of renal failure in children	The New England journal of medicine	ESCAPE Trial Group., Wühl E, Trivelli A, Picca S, Litwin M, Peco-Antic A, Zurowska A, Testa S, Jankauskiene A, Emre S, Caldas-Afonso A, Anarat A, Niaudet P, Mir S, Bakkaloglu A, Enke B, Montini G, Wingen AM, Sallay P, Jeck N, Berg U, Caliskan S, Wygoda S, Hohbach-ohenfellner K, Dusek J, Urasinski T, Arbeiter K, Neuhaus T, Gellermann J, Drozdz D, Fischbach M, Möller K, Wigger M, Peruzzi L, Mehls O…	A	Randomized trial	Children	N= 385 (N=189 intensive treatment group, N=196 conventional treatment group)	children with renal disease	2	Intensive BP control. Ramipril 6 mg/m2/day and additional antihypertensive therapy that does not target the renin-angiotensin system to achieve 24 hr mean arterial pressure below the 50th %ile or in the 50th to 95th %ile, depending on to which group the subject was assigned. Study lasted 5 years.	Conventional BP control.	Progression of renal disease in children with chronic kidney disease as measured by time to a decline of 50% in the GFR or progression to end stage renal disease.	N/A- ABPM	Intensified antihypertensive treatment (to maintain mean 24 hr arterial pressure at < 50th %ile) significantly delayed the progession of renal disease (P=0.02) compared to maintenance of 24 hr mean arterial pressure between 50th and 95th %ile.	Slowed progression in renal disease with more intensive ramipril therapy	Reappearance of proteinuria after initial successful pharmacologic blood-pressure control. 19 reported adverse events: hyperkalemia (7), hypotension (2), and other adverse events (10)	B>H	None reported.
PICOT3	179	added	Nagasako SS, Nogueira PC, Machado PG, Pestana JO	N/A	Table 12	2007	Risk factors for hypertension 3 years after renal transplantation in children	Pediatr Nephrol	Nagasako SS, Nogueira PC, Machado PG, Pestana JO. Risk factors for hypertension 3 years after renal transplantation in children. Pediatr Nephrol. 2007 Sep;22(9):1363-8	B	Case- control study retrospective study	Children and adolescents	N= 124	Brazilian children (up to 18 years of age) status post renal transplantation (3 years prior)	Unknown	N/A	No hypertension 36 months post renal transplantation	N/A	Yes- 3 measurements	The presence of hypetension prior to transplantation was associated with an odds of 5.27:1 (CI 2.2, 12.7). Other potential risk factors for hypertension 36 months post transplantation were not identified.	Knowledge of risk factors for hypertension post renal transplantation.	Small sample size.	B>H	Retrospective study.
PICOT3	180	added	Roche SL, Kaufmann J, Dipchand AI, Kantor PF	N/A	Table 12	2008	Hypertension after pediatric heart transplantation is primarily associated with immunosuppressive regimen	J Heart Lung Transplant	Roche SL, Kaufmann J, Dipchand AI, Kantor PF. Hypertension after pediatric heart transplantation is primarily associated with immunosuppressive regimen. J Heart Lung Transplant. 2008 May;27(5):501-7	C	Restrospective cohort study	Children	N= 51	Children following pediatric heart transplantation at a single center (Sick Children's Toronto); median 5.5 years post heart transplant	2-ABPM	N/A	N/A	ABPM results	N/A- ABPM	1. Mean tacrolimus levels of 10 versus 8 was associated with hypertension (p <0.05). 2. Use of steroid was associated with hypertension (p< 0.05). 3. Steroid administration was also associated with a higher nighttime blood pressure	Knowledge of the potential impact of immunosuppression regimen on daytime and nighttime blood pressure.	Small sample size.	B>H	Large % of the sample without sufficient data (?skewed results toward those most likely to have elevated BP).
PICOT3	181	added	Paripovic D, Kostic M, Spasojevic B, Kruscic D, Peco-Antic A	N/A	Table 12	2010	Masked hypertension and hidden uncontrolled hypertension after renal transplantation	Pediatr Nephrol	Paripovic D, Kostic M, Spasojevic B, Kruscic D, Peco-Antic A. Masked hypertension and hidden uncontrolled hypertension after renal transplantation. Pediatr Nephrol. 2010 Sep;25(9):1719-24	C	Cross-sectional study	Children and adolescents	N= 55	6-20 year olds status post renal transplantation at a single center	2- ABPM; 4- mercury sphyngomanometer	N/A	N/A	ABPM results	Yes- 3 measurements for mercury device	1. 42% of patients were hypertensive; 2. The prevalence of nocturnal hypertension was 68%. 3. There was no correlation between systolic or diastolic daytime, nighttime, or 24-h BP and estimated glomerular filtration rate	Knowledge of prevlance of hypertension post renal transplantation	Small sample size	B>H	Single center, small sample size.
PICOT3	182	45	Ferraris JR, Ghezzi L, Waisman G, Krmar RT	N/A	Table 12	2007	ABPM vs office blood pressure to define blood pressure control in treated hypertensive paediatric renal transplant recipients	Pediatr Transplant	Ferraris JR, Ghezzi L, Waisman G, Krmar RT. ABPM vs office blood pressure to define blood pressure control in treated hypertensive paediatric renal transplant recipients. Pediatr Transplant. 2007 Feb;11(1):24-30	C	Retrospective study	Children and adolescents	N= 26	Children s/p renal transplant ttreated hypertensive children and adolescents who regularly attended the Paediatric Renal Transplant Section at Hospital Italiano (Buenos Aires, Argentina)	2- ABPM; 4- mercury sphyngomanometer	N/A	N/A	ABPM results	Yes- 3 measurements for mercury device	When office BP and ABPM were compared using the Bland and Altman method, the 95% limits of agreement between office and daytime values ranged from )12.6 to 34.1 mmHg for systolic and )23.9 to 31.7 mmHg for diastolic BP, and the mean difference was 10.7 and 3.9 mmHg respectively. Office readings miss a substantial number of recipients who are hypertensive by ABPM criteria. Undertreatment of hypert…	Knowledge of prevlance of hypertension post renal transplantation	Small sample size	B>H	Single center, small sample size.
PICOT3	183	20	McGlothan KR, Wyatt RJ, Ault BH, Hastings MC, Rogers T, DiSessa T, Jones DP	N/A	Table 12	2006	Predominance of nocturnal hypertension in pediatric renal allograft recipients	Pediatr Transplant	McGlothan KR, Wyatt RJ, Ault BH, Hastings MC, Rogers T, DiSessa T, Jones DP. Predominance of nocturnal hypertension in pediatric renal allograft recipients. Pediatr Transplant. 2006 Aug;10(5):558-64	C	Observational, longitudinal	Children and adolescents	N= 29	Renal allograft recipients (living or cadaveric donor) who were on stable maintenance immunosuppressive medications and were more than six months post-transplant	2-ABPM	N/A	N/A	Echocardiographic measurement of left ventricular mass index (LVMI); ABPM measurements	N/A- ABPM	1. Hypertension (HTN) during sleep was more common than awake HTN: Based upon mean BP load, 38% had sHTN when awake compared with 55% during sleep and 21% demonstrated dHTN when awake compared with 52% during sleep (p < 0.05); 2. Left ventricular mass (LVM) was abnormally increased in ; LVM was not correlated with BP	Knowledge of pattern o HTN s/p renal transplantation	Small sample size	B>H	Single center, small sample size. Non-US population
PICOT4	184	28 (PICOT2/4); 617 (PICOT3)	Balzano R, Lindblad YT, Vavilis G, Jogestrand T, Berg UB, Krmar RT	N/A	Table 12	2011	Use of annual ABPM, and repeated carotid scan and echocardiography to monitor cardiovascular health over nine yr in pediatric and young adult renal transplant recipients	Pediatric Transplantation	Balzano R, Lindblad YT, Vavilis G, Jogestrand T, Berg UB, Krmar RT. Use of annual ABPM, and repeated carotid scan and echocardiography to monitor cardiovascular health over nine yr in pediatric and young adult renal transplant recipients. Pediatr Transplant. 2011 Sep;15(6):635-41.	B/C	Case-control (related)	Children and adults	Total: 43; N=22 adult (>18 years) renal transplant recipients	Renal transplant recipients; Swedish; single center	2-ABPM	N/A	N=21 children 3 to 18 years of age	ABPM Echocardiogram (LVH) Carotid scan (cIMT)	N/A- ABPM	In this group of 22 subjects (18.6 +/- 3.4 years) at time of 3rd (final) carotid scan (approx 10 years after first scan) there was no change (e.g. no progression of cIMT over time and prevalence of LVH was 5%. 82% of patients with HTN were considered controlled at last follow-up	Inferred that good BP control may be associated with lack of progresson of cITM and low prevalence of LVH.	None reported	B>H	Small sample.
PICOT3	185	added	Krmar RT, Berg UB	N/A	Table 12	2008	Blood pressure control in hypertensive pediatric renal transplants: role of repeated ABPM following transplantation	Am J Hypertens	Krmar RT, Berg UB. Blood pressure control in hypertensive pediatric renal transplants: role of repeated ABPM following transplantation. Am J Hypertens. 2008 Oct;21(10):1093-9	C	Prospective, longitudinal	Children and adoldescents	N= 37	Post renal transplantation patients followed for ~4 years post transplantation (renal transplantation between 1 January 1998 and 31 December 2005) and undergoing serial ABPM assessment. Sweedish children.	2-ABPM	N/A	Historical control	ABPM results	N/A- ABPM	Antihypertensive therapy that was either started or intensified in 27 recipients based upon ABPM results was associatd with better blood pressure control (24 of 29 treated hypertensive recipients displayed controlled BP). Significantly higher control was noted compared to a historical hypertensive control recipients in whom ABPM was applied for the first time in treatment at 6 ± 3.3 years (range …	Knowledge of the potential positive impact of ABPM use on longer term BP control	Small sample size	B>H	Single center, small sample size. Non-US population
PICOT1	186	20	Ambrosi P, Kreitmann B, Habib G	N/A	Table 12	2014	Home blood pressure monitoring in heart transplant recipients: comparison with ambulatory blood pressure monitoring	Transplantation	Ambrosi P, Kreitmann B, Habib G. Home blood pressure monitoring in heart transplant recipients: comparison with ambulatory blood pressure monitoring. Transplantation. 2014 Feb 15;97(3):363-7.	A/ JD - B	Analytical: RCT (JD - Cross-sectional)	Adults	N= 75	Children s/p post heart transplantation; Adults (18-80 years), but limited pediatric data	2- ABPM, 4-home BP assessment	N/A	N/A	Diagnosis of HTN as = to BP >130/80mmHg; Pearson bivariate correlation	Yes- 2 in the AM and 2 measurements in the PM	HBPM and ABPM correlate well w/ regard to blood pressure measurment and with identification of end organ injury (ie., proteinuria). 3-day HBPM and conventional 7-day HBPM had similar correlations with ABPM (0.75 and 0.71 for SBP, 0.62 and 0.65 for DBP)	Cost effective (Home BP assessment)	HBPM may miss non-dippers (identified by ABPM)	B=H	Exclude (Adults)? 72% were non-dippers by ABPM missed by home BP. Unclear which ABPM parameter compared (daytime or 24 hour). Correlation good, variance wide.
PICOT3	187	added	Seeman T, Simková E, Kreisinger J, Vondrák K, Dusek J, Dvorák P, Stuchlikova H, Janda J	N/A	Table 12	2007	Reduction of proteinuria during intensified antihypertensive therapy in children after renal transplantation	Transplant Proc	Seeman T, Simková E, Kreisinger J, Vondrák K, Dusek J, Dvorák P, Stuchlikova H, Janda J. Reduction of proteinuria during intensified antihypertensive therapy in children after renal transplantation. Transplant Proc. 2007 Dec;39(10):3150-2	C	Prospective, longitudinal	Children	N=12	Post renal transplant recipients with children with proteinuria 200 mg/m2/d; Czech republic	2- ABPM	ACEi	N/A	Protein in the urine	N/A- ABPM	1. Median protein excretion decreased from 278 mg/m2/d to 199 mg/m2/d after 1 year (P <0.05 vs baseline) using all classes of antihypertensive therapy. 2. The number of antihypertensive drugs was increased from 1.6 1.0 to 2.2 0.9 drugs/patient after 1 year (P <0 .05). The use of different classes of antihypertensive drugs did not change significantly. Mean ambulatory systolic and diastolic BP at …	Knowledge of the impact of blood pressure control on proteinuria in renal transplant recipients.	Small sample size	B>H	Single center, small sample sizse. Non-US population.
PICOT3	188	413	Seeman T, Simková E, Kreisinger J, Vondrák K, Dusek J, Gilík J, Dvorák P, Janda J	N/A	Table 12	2007	Improved control of hypertension in children after renal transplantation: results of a two-yr interventional trial	Pediatr Transplant	Seeman T, Simková E, Kreisinger J, Vondrák K, Dusek J, Gilík J, Dvorák P, Janda J. Improved control of hypertension in children after renal transplantation: results of a two-yr interventional trial. Pediatr Transplant. 2007 Aug;11(5):491-7	B	Prospective cohort ( interventional) study	Children	N= 36	Post renal transplant recipients; Czech republic	2- ABPM	Intensified antihypertensive drug therapy	N/A	ABPM results	N/A- ABPM	The number of antihypertensive drugs increased from 2.1 ± 0.9 to 2.7 ± 0.8 drugs per patient (p < 0.05), this was especially seen with the use of ACE-inhibitors (increase from 19% to 40% of children, p < 0.05). In conclusion, this interventional trial demonstrated that, in children after renal transplantation, the control of hypertension, especially at night-time, can be improved by increasing th…	Knowledge of strategie for controlling BP post renal transplantation	Small sample size	B>H	Single center, small sample sizse. Non-US population
PICOT1	199	181	Lurbe E, Torro I, Alvarez V, Nawrot T, Paya R, Redon J, Staessen JA	7	4.7	2005	Prevalence, persistence, and clinical significance of masked hypertension in youth	Hypertension	Lurbe E, Torro I, Alvarez V, Nawrot T, Paya R, Redon J, Staessen JA. Prevalence, persistence, and clinical significance of masked hypertension in youth. Hypertension. 2005 Apr;45(4):493-8.	B, B	nested case-control	Children and adolescents	N=535	all White; Spanish	2		n/a	ABPM measurements	n/a	Masked hypertension in ~10% of children and adolescents. Male sex, Diabetes, older had higher blood pressure than those without cardiac events; 24 hr HR weakly predicts total CV events; BP during the first 4hr period of nighttime SBP strongest predictive value for total CV events.			B>H
PICOT1	200	added	Stabouli S, Kotsis V, Toumanidis S, Papamichael C, Constantopoulos A, Zakopoulos N	7	4.7, 4.7b	2005	White-coat and masked hypertension in children: association with target-organ damage	Pediatr Nephrol	Stabouli S, Kotsis V, Toumanidis S, Papamichael C, Constantopoulos A, Zakopoulos N. White-coat and masked hypertension in children: association with target-organ damage. Pediatr Nephrol. 2005 Aug;20(8):1151-5	C	Cross-sectional study	Children	N= 85	Children who were referred to a hypertension center for evaluation of suspected hypertension from their primary health care providers (secondary hypertension excluded)	4- mercury sphyngomanometer	N/A	N/A	HBP	Yes- 3 measurements	WCH was found in 12.9% and masked hypertension in 9.4% of the subjects. WCH was significantly more prevalent in obese subjects, while masked hypertension was only present in non-obese ones. Confirmed and masked hypertensives had significantly higher left ventricular mass index than confirmed normotensives (34.0€5.8 g/m2.7, 31.9€2.9 g/m2.7 and 25.3€ 5.6 g/m2.7, respectively, P<0.05). White-coat hy…	Knowledge of a slightly higher prevlence of LVH in children with WCH	None	B>H	Non-US population.
PICOT1	201	added	Furusawa ÉA, Filho UD, Junior DM, Koch VH	7	4.7a	2011	Home and ambulatory blood pressure to identify white coat and masked hypertension in the pediatric patient	Am J Hypertens	Furusawa ÉA, Filho UD, Junior DM, Koch VH. Home and ambulatory blood pressure to identify white coat and masked hypertension in the pediatric patient. Am J Hypertens. 2011 Aug;24(8):893-7	B	Prospective cohort study	Children	N= 40	Brazilian children. Average age of 12 years; 40 patients with HT (75% of which had secondary HT and were on antihypertensive medication), mean age 12.1 years	4- Mercury sphygmomanometer (in office); 1-OBP (home measurement using Omron device)	N/A	N/A	BP	Yes- 3 measurements	HT was diagnosed in the doctor’s office and by by ABP and HBP in 30/40, 27/40, and 31/40 patients, respectively. Based on office BP and ABP, 60% of patients were normotensive, 17.5% HT, 7.5% had WCH, and 15% had MH, whereas based on office BP and HBP 65, 12.5, 10, and 12.5% of patients were classified according to these diagnoses, respectively. There was considerable diagnostic agreement of HT by…	Knowledge that In hypertensive children and adolescents, HBP and ABP present comparable results. HBP appears to be a useful diagnostic test for the detection of MH and WCH in pediatric patients.	None reported	B>H	Non-US population.
PICOT3/ PICOT4	202	545/ 204	Wells TG, Portman R, Norman P, Haertter S, Davidai G, Fei Wang	7	7.3a	2010	Safety, efficacy, and pharmacokinetics of telmisartan in pediatric patients with hypertension	Clin Pediatr (Phila)	Wells TG, Portman R, Norman P, Haertter S, Davidai G, Fei Wang. Safety, efficacy, and pharmacokinetics of telmisartan in pediatric patients with hypertension. Clin Pediatr (Phila). 2010 Oct;49(10):938-46	A	RCT	Children	N=77 (N=16 placebo, N= 61 treatment)	Children 6 to 18 years of age with hypertension	Unknown	2 week washout period. 4 weeks of treatment with hig dose telmesartan (2mg/kg), low dose telmesartan (1 mg/kg) or placebo. Pharmacokinetic (PK) variables were assessed on day 28 of the study.	placebo	Primary efficacy endpoint -change in seated SBP from baseline to end of treatment. Secondary efficacy endpoints - change in seated DBP from baseline to end of treatment, BP response defined as achievement of BP < 95th %ile at final visit, PK variables, and safety.	Unknown	Statistically significant change from baseline in SBP in the high-dose telmesartan group (P=.0027) compared to the low-dose group (P=.1930) and placebo. Differences in DBP did not reach statistical significance but were considered by authors to be clinically significant. Interindividual variation was observed with respect to PK variables and comparisons based on gender and race showed no signific…	Effective BP lowering following receipt of telmesartan	None reported	B>H	Limited sample size.
PICOT1	203	added	Mitsnefes M, Flynn J, Cohn S, Samuels J, Blydt-Hansen T, Saland J, Kimball T, Furth S, Warady B; CKiD Study Group	N/A, 23	4.7a, 8.1a	2010	Masked hypertension associates with left ventricular hypertrophy in children with CKD	J Am Soc Nephrol	Mitsnefes M, Flynn J, Cohn S, Samuels J, Blydt-Hansen T, Saland J, Kimball T, Furth S, Warady B; CKiD Study Group.. Masked hypertension associates with left ventricular hypertrophy in children with CKD. J Am Soc Nephrol. 2010 Jan;21(1):137-44	C	Cross-sectional study	Children	N= 366	Children with stages 2 through 4 chronic kidney disease (CKD)	2- ABPM	N/A	N/A	N/A	N/A- ABPM	17% of children had LVH (11% eccentric and 6% concentric) and 9% had concentric remodeling of the left ventricle. On the basis of a combination of ambulatory and casual BP assessment (n = 198), 38% of children had masked hypertension (normal casual but elevated ambulatory BP) and 18% had confirmed hypertension (both elevated casual and ambulatory BP). There was no significant association between …	Large population of children with CKD demonstrates that LVH is strongly associated with hypertension.	Casual BP measurements alone are insufficient to detect the presence of LVH-inducing hypertension and indicates that ABPM should be performed routinely in this patient population	B>H	Cross-sectional analysis and the lack of information on the duration of hypertension and thus an inability to evaluate whether a cause-and-effect relationship exists between BP and LVH.
PICOT1	205	added	Pogue V, Rahman M, Lipkowitz M, Toto R, Miller E, Faulkner M, Rostand S, Hiremath L, Sika M, Kendrick C, Hu B, Greene T, Appel L, Phillips RA	N/A	4.7a	2009	Disparate estimates of hypertension control from ambulatory and clinic blood pressure measurements in hypertensive kidney disease	Hypertension	Pogue V, Rahman M, Lipkowitz M, Toto R, Miller E, Faulkner M, Rostand S, Hiremath L, Sika M, Kendrick C, Hu B, Greene T, Appel L, Phillips RA; African American Study of Kidney Disease and Hypertension Collaborative Research Group.. Disparate estimates of hypertension control from ambulatory and clinic blood pressure measurements in hypertensive kidney disease. Hypertension. 2009 Jan;53(1):20-7	C	Cross-sectional study	Adults	N= 617	Adults; members of the African American Study of Kidney Disease and Hypertension Trial (AASK cohort study members); African Americans with HTN and kidney disease	2- ABPM	N/A	N/A	BP (masked hypertension)	N/A- ABPM	Clinic BP provides an incomplete and potentially misleading assessment of the severity of hypertension in African Americans with hypertensive kidney disease, in large part because of increased nighttime BP. The use of ABP monitoring reveals a very high prevalence of masked hypertension, which, in turn, may be associated with hypertension-related target organ damage.	Knowledge of the importance of ABPM in assessing target organ damage risk (masked HTN) in AA's with kidney disease	No harms reported	B>H	Single racial/ethnic group (African Americans only); adults only.
PICOT1	207	137	Kavey RE, Kveselis DA, Atallah N, Smith FC	9	4.7b	2007	White coat hypertension in childhood: evidence for end-organ effect	The Journal of pediatrics	Kavey RE, Kveselis DA, Atallah N, Smith FC. White coat hypertension in childhood: evidence for end-organ effect. J Pediatr. 2007 May;150(5):491-7.	C	Observational, included office, ABPM and LVM and exercise measures	Children and adolescents	N=119	Children and adolscents , 6 to 18 years of age; Elevated office BP measures subdivided into white coat hypertension (WCH) and essential hypertension.	2	N/A	Comparison of those with WCH to true hypertension	office BP, exercise BP and LVM in those with WCH and true hypertension	N/A- ABPM	Office BP the same in both groups; ABPM, exercise BP and LVM much higher in those with true hypertension but LVH, abnormal BP response to exercise occurs in patients with WCH	Knowledge of exericse BP, ABPM and LVM in youth with WCH versusu true hypertension	No harm identified	B> H	No normotensive control population.
PICOT1	208	added	Swartz SJ, Srivaths PR, Croix B, Feig DI	N/A	4.7b, 15.1	2008	Cost-effectiveness of ambulatory blood pressure monitoring in the initial evaluation of hypertension in children	Pediatrics	Swartz SJ, Srivaths PR, Croix B, Feig DI. Cost-effectiveness of ambulatory blood pressure monitoring in the initial evaluation of hypertension in children. Pediatrics. 2008 Dec;122(6):1177-81	C	Retrospective chart review	Children and Young Adults	N=267	(Single Center- Texas Children's), 0.08 to 24 years	2-ABPM, 4-mercury sphyngomanometer	N/A	N/A	Costs (ABPM versus lab testing, renal U/S, echocardiography)	4- measurements	Predicted savings of $0.24 million for every 1000 patients referred for Stage 1 hypertension	Overall cost savings via use of ABPM.	Cost to families if ABPM is not approved.	B>H	Single center study.
PICOT1	209	added	Briasoulis A, Androulakis E, Palla M, Papageorgiou N, Tousoulis D	9	4.7b	2016	White-coat hypertension and cardiovascular events: a meta-analysis	J Hypertens	Briasoulis A, Androulakis E, Palla M, Papageorgiou N, Tousoulis D. White-coat hypertension and cardiovascular events: a meta-analysis. J Hypertens. 2016 Apr;34(4):593-9	A	meta-analysis	Adults	N=29,100(N=14 studies)	WCH	Unknown	N/A	N/A	Mortality, stroke,	Unknown	Incidence of cardiovascular events (5.7% in WCH; 11.4% in sustained HTN patients); All-cause death of 12.1% in WCH and 7.7% in Normotensive persons	N/A	N/A	N/A	Adults only.
PICOT2	210	199	Valent-Morić B, Zigman T, Zaja-Franulović O, Malenica M, Cuk M	9	4.7b	2012	The importance of ambulatory blood pressure monitoring in children and adolescents	Acta clinica Croatica	Valent-Morić B, Zigman T, Zaja-Franulović O, Malenica M, Cuk M. The importance of ambulatory blood pressure monitoring in children and adolescents. Acta Clin Croat. 2012 Mar;51(1):59-64.	C	Retrospective cohort	Children, adolescents, and young adults	N=139	Croatian children referred for assessment of HTN from the clinic. At least 3 readings of BP > 95th %tile; 4-19 years	2-ABPM	N/A	None	1) diagnosis of HTN; 2) presence of complications of the HTN	N/A- ABPM	1) HTN is common in children - both primary and secondary, 2) ABPM is a good method to diagnose HTN. 3) BP load was not seen in Pri/Sec HTN 4)Non -Dipping phenomenon was seen in sec HTN 5) Elevated PP was associated with target organ damage	ABPM is a useful method to diagnose HTN	No reported harm	B>H	Retrospractive, selective population. Also, non-US study.
Missing	213	added	Ostchega Y, Hughes JP, Prineas RJ, Zhang G, Nwankwo T, Chiappa MM	N/A	4.8	2014	Mid-arm circumference and recommended blood pressure cuffs for children and adolescents aged between 3 and 19 years: data from the National Health and Nutrition Examination Survey, 1999-2010	Blood Press Monit	Ostchega Y, Hughes JP, Prineas RJ, Zhang G, Nwankwo T, Chiappa MM. Mid-arm circumference and recommended blood pressure cuffs for children and adolescents aged between 3 and 19 years: data from the National Health and Nutrition Examination Survey, 1999-2010. Blood Press Monit. 2014 Feb;19(1):26-31	C	Cross-sectional study	Children	N= 21,350	Children 3-19 years of age; NHANES participants	N/A	N/A	N/A	mid arm circumference (AC) measurement; overall trend in mid AC between 1999-2010	N/A	20% of boyx and 20% of girls require a standard adult cuff; no change in median AC during the 12 year follow-up period	Knowledge of mid AC in children	Failure to appreciate the need for application of appropriate cuff size to achieve optimal BP cuff size/mid AC rations close 40% could lead to "under cuffing" and false positive	B<H	Cross-sectional study.
Missing	214	added	Bonso E, Saladini F, Zanier A, Benetti E, Dorigatti F, Palatini P	N/A	4.8	2010	Accuracy of a single rigid conical cuff with standard-size bladder coupled to an automatic oscillometric device over a wide range of arm circumferences	Hypertens Res	Bonso E, Saladini F, Zanier A, Benetti E, Dorigatti F, Palatini P. Accuracy of a single rigid conical cuff with standard-size bladder coupled to an automatic oscillometric device over a wide range of arm circumferences. Hypertens Res. 2010 Nov;33(11):1186-91	C	Observational cohort study	Adults	N= 142	Adults with arm circumference of 22-45cm	1- OBP	N/A	rigid cylindrical cuff	BP	Yes- at least 3	Conical BP cuffs offer a reliable method for BP assessment; use of a cylindrical cuff on large arms may cause an overestimation of the true BP	Knowledge of appropriate cuff shape for BP assessment	cylindrical cuffs may overestime BP	B>H	Adults only; may not apply to children. Non-US study.
Missing	215	added	Palatini P, Benetti E, Fania C, Malipiero G, Saladini F	N/A	4.8	2012	Rectangular cuffs may overestimate blood pressure in individuals with large conical arms	J Hypertens	Palatini P, Benetti E, Fania C, Malipiero G, Saladini F. Rectangular cuffs may overestimate blood pressure in individuals with large conical arms. J Hypertens. 2012 Mar;30(3):530-6	C	Observational cohort study	Adults	N= 220	Adults with arm circumference of 22-42.5cm	1- OBP	N/A	N/A	BP	Yes- at least 3	In obese people, the upper arm may have a pronounced tronco-conical shape and cylindrical cuffs may overestimate BP. Tronco-conical cuffs should be used for BP measurement in individuals with large arms	Knowledge of potential biases in BP assessment among obese individuals when using cylindrical cuffs	Adult only	B>H	Adults only; may not apply to children. Non US study.
PICOT1	216	10	Aguilar A, Ostrow V, De Luca F, Suarez E	N/A	4.8, 10	2010	Elevated ambulatory blood pressure in a multi-ethnic population of obese children and adolescents	The Journal of pediatrics	Aguilar A, Ostrow V, De Luca F, Suarez E. Elevated ambulatory blood pressure in a multi-ethnic population of obese children and adolescents. J Pediatr. 2010 Jun;156(6):930-5.	C	Cross-sectional	Children	N=43	Multi ethnic, multi- racial population. Children 6 to 17 years of age. Obese (BMI >95th percentile) WITHOUT a diagnosis of HTN, diabetes, or taking medications known to affect blood pressure; 51% Hispanic, 33% African-American, 16% Caucasian.	4- mercury sphygmomanometer; ABPM	N/A	BMI < 2.5 SDS	24hour ABPM results: mean SBP, mean DBP (daytime and nighttime), nocturnal dipping	N/A-ABPM; Yes- 3 measurements	Obese children with normal clinic blood pressure often exhibit elevated ABP. The risk for ambulatory hypertension appears to be correlated with the degree of obesity. Higher mean 24 hour SBP and nighttime SBP in children with BMI > 2.5 SDS versus <= 2.5 SDS. Obese children with normal clinic blood pressure have a higher prevalence of elevated ambulatory blood pressure. Greater likelihood of maske…	Earlier recognition of elevated blood pressure w/ use of ABPM in at risk youth; early diagnosis of masked hypertension	additional cost	B>H	Selection bias: largely minority, inner city population (single center, St. Christopher's in Philadelphia).
	217	added	Ostrow V, Wu S, Aguilar A, Bonner R Jr, Suarez E, De Luca F	9	4.7b	2011	Association between oxidative stress and masked hypertension in a multi-ethnic population of obese children and adolescents	J Pediatr	Ostrow V, Wu S, Aguilar A, Bonner R Jr, Suarez E, De Luca F. Association between oxidative stress and masked hypertension in a multi-ethnic population of obese children and adolescents. J Pediatr. 2011 Apr;158(4):628-633.e1	B	Prospective case -control	Children	N=42 obese and N=34 non obese	Obese children	4- mercury sphyngomonometer	N/A	non-obese children	BP	Yes- 3 measurements	Significant correlation between oxidative stress, adiposity, and blood pressure in children	Knowledge of relationship between stress, adiposity and BP	None reported	B>H	Small sample size.
PICOT1	218	added	Woroniecki RP, Flynn JT	10	4.9	2005	How are hypertensive children evaluated and managed	Pediatr Nephrol	Woroniecki RP, Flynn JT. How are hypertensive children evaluated and managed? A survey of North American pediatric nephrologists. Pediatr Nephrol 2005;20:791-7	B	Observational, survey study	Children	N=438	Children treated for HTN by a pediatric neprhologist; survey of pediatric nephrologists	1, 2, 4-mercury sphyngomanometer	N/A	N/A	N/A	N/A	Among nephrologists managing children with hypertension: 70% used oscillometric devices for diagnosis of HTN; 22% used mercury or sphygmomanometers; 63% use ABPM (52% for diagnosis and monitoring; 10% for diagnosis only); treatment goal of less than 90th percentile among 59%; among children with renal disease and HTN, 85% used a lower goal; most common first prescribed medication was an ACEi (46.…	N/A	N/A	N/A	Less than 50% response rate among those asked to participate in the survey.
PICOT1	219	added	Mengden T, Hernandez Medina RM, Beltran B	10	4.9	1998	Reliability of reporting self-measured blood pressure values by hypertensive patients	Am J Hypertens	Mengden T, Hernandez Medina RM, Beltran B, et al. Reliability of reporting self-measured blood pressure values by hypertensive patients. Am J Hypertens 1998;11:1413-7	C	Prospective cohort study	Adults	N= 30	Adults	1	N/A	N/A	Reporting of home recorded BP (comparison of patient recorded BP to automatically recorded BPs)	Yes- at least 3 measurements (mean number of 49 measurements)	63% of measurements were either omitted or not recorded accurately. Underreporting of BP occurred in 36% of cases. Overreporting in 9%. The precision of reporting was 76%.	Knowledge of the accuracy of home BP recordings (recorded versus stored measurements)	Inaccurate recording of home BP occurs frequently.	B<H	Small sample. Adult study. Unknown if parents would be more likely to record home BPs more accurately.
PICOT1	222	259	Stergiou GS, Nasothimiou E, Giovas P, Kapoyiannis A, Vazeou A	10	4.9	2008	Diagnosis of hypertension in children and adolescents based on home versus ambulatory blood pressure monitoring	J Hypertens	Stergiou GS, Nasothimiou E, Giovas P, Kapoyiannis A, Vazeou A. Diagnosis of hypertension in children and adolescents based on home versus ambulatory blood pressure monitoring. J Hypertens. 2008 Aug;26(8):1556-62	C	Prospective cohort study	Children and adolscents	N= 102 (N=105, 3 excluded)	Greek children and adolescents, 6-18 years of age referred to hypertension clinic for elevated blood pressure; Clinic, home and ABPM blood pressure measurments	4- at least 12 home BP measurements or 4 or more days; 2- at least 20 ABPM measurements; 6 clinic BP measurements	N/A	Clinic BP	Diagnosis of HTN based upon BP	Yes- at least 3 measurements	HTN was diagnosed in 38% by clinic measurement, 30% by awake ABPM, 23% by home BP measurement (p=0.07); there was agreement if HTN diagnosis by BP measurement (60.8%)	Home BP, ABPM and clinic BP may be equally as likely as detecting HTN	Insufficient sample size for significance	B>H	Non-US population; clinic BP was a school based oscillometric and not mercury sphyngomanometer measurement.
PICOT1	223	added	Furusawa EA, Filho UD, Koch VH	10	4.9	2009	Home blood pressure monitoring in paediatric chronic hypertension	J Hum Hypertens	Furusawa EA, Filho UD, Koch VH. Home blood pressure monitoring in paediatric chronic hypertension. J Hum Hypertens 2009;23:464-9	B	Prospective cohort study	Children and adolescents	N=44 (40 analyzed)	Brazilian children; 4-18 years of age	6- home BP measurements per day for 13 days versus in office BP measurment using mercury sphygmomanometer x 3	N/A	office BP assessment	HBP	3- measurements in office	HBP is a reproducible method for assessing BP.	Ease and decreased expense of home BP assessment	No reported harm	B>H	Non-US population. Study population may not be reflective of US population; standard protocols for HBP assessment do not exist.
PICOT1	224	added	Stergiou GS, Nasothimiou EG, Giovas PP, et al	10	4.9	2009	Long-term reproducibility of home vs. office blood pressure in children and adolescents: the Arsakeion school study	Hypertens Res	Stergiou GS, Nasothimiou EG, Giovas PP, et al. Long-term reproducibility of home vs. office blood pressure in children and adolescents: the Arsakeion school study. Hypertens Res 2009;32:311-5	B	Prospective cohort study	Children and adolescents	N=96 (51 actually enrolled)	Greek children participating in the Arsakeion study with elevated office and/or home BP; 6 to 17 years of age (Arsakeion study)	3 consecutive day home BP measurements (4 per day); 4-office mercury sphygmomanometer	N/A	office BP assessment	HBP	at least 6- measurements at home; 2- in office measurements	Home BP is superior to office for SBP and DBP.	Ease and decreased expense of home BP assessment; Better long-term reproducibility of BP assessment.	No reported harm	B>H	Non-US population. Study population may not be reflective of US population; standard protocols for HBP assessment do not exist.
PICOT1	225	258	Wühl E, Hadtstein C, Mehls O, et al	10	4.9	2004	Home, Clinic, and Ambulatory Blood Pressure Monitoring in Children with Chronic Renal Failure	Pediatr Res	Wühl E, Hadtstein C, Mehls O, et al. Home, Clinic, and Ambulatory Blood Pressure Monitoring in Children with Chronic Renal Failure. Pediatr Res 2004;55:492-497	B	Prospective cohort study	Children	N=118	European children	2- ABPM, 4- home (at least 3 during a 2 to 7 day period around the time of ABPM measurement)	N/A	ABPM	HBP, office BP, ABPM	Unknown	Home BP as a valuable addition to clinic BP and agrees with ABPM more closely than office BP. Consistent measruements canbe obtained over time.	HBP as a less expensive alternative	1 out of every 4 chilren diagnosed with HTN by ABPM would be missed by office BP and HBP.	B<H	Non-US population. Study population may not be reflective of US population; standard protocols for HBP assessment do not exist.
PICOT1	226	258	Stergiou GS, Karpettas N, Panagiotakos DB, et al	10	4.9	2011	Comparison of office, ambulatory and home blood pressure in children and adolescents on the basis of normalcy table	J Hum Hypertens	Stergiou GS, Karpettas N, Panagiotakos DB, et al. Comparison of office, ambulatory and home blood pressure in children and adolescents on the basis of normalcy tables. J Hum Hypertens 2011;25:218-23	B	Combination of 3 cross-sectional studies	Children and adolescents	Total N=64,954; US, N=63,227; Germany, N=949; Greece, N=778	US, Germany, Greece; 5- 16 years of age	2-ABPM, HBP, office BP	N/A	ABPM	HBP, office BP, ABPM	Unknown	Variablility in BP norms	Good comparison	three different reference tables from 3-different population sets	B>H	Non-US population.
PICOT1	227	253	Stergiou GS, Alamara CV, Kalkana CB, Vaindirlis IN, Stefanidis CJ, Dacou-Voutetakis C, Mountokalakis TD	10	4.9	2004	Out-of-office blood pressure in children and adolescents: disparate findings by using home or ambulatory monitoring	American journal of hypertension	Stergiou GS, Alamara CV, Kalkana CB, Vaindirlis IN, Stefanidis CJ, Dacou-Voutetakis C, Mountokalakis TD. Out-of-office blood pressure in children and adolescents: disparate findings by using home or ambulatory monitoring. Am J Hypertens. 2004 Oct;17(10):869-75.	A/ JD - B	Cross-sectional	Children and adolescents	N=55	Children ages 6-18 years referred for high blood pressure. Mean age 12.3 years. Greek population but include due to limited US population; N=23 normotensives - daytime ABP below 90th %ile of daytime sytolic and diastolic BP and clinic blood pressure < 90th %ile - mean age 11.4 years. 32 hypertensives - Clinic BP > 90th %ile - mean age 13 years.	4- Home, ambulatory and clinic BP measurements	N/A	ABPM	Home blood pressures in this study were significantly lower than daytime ambulatory blood pressures. The home blood pressures were lower than the clinic blood pressure for both hypertensives and normotensives (to a lesser degree) for systolic but not diastolic BP.	N/A- ABPM	In both normotensives and hypertensives the difference in systolic blood pressure between home and ambulatory measurements was > 12 mm Hg. The difference for diastolic BP was smaller < 5mm Hg. Systolic home BP was lower than awake ambulatory BP in both children (mean difference 14.6 +/- 6.2 mm Hg, P < .001) and adolescents ( mean difference 13.1 +/- 7.3 mm Hg, P<.001). The differences in diastoli…	None reported	None reported	B<H	Small sample size. Non-US population.
PICOT1	228	added	Stergiou GS, Rarra VC, Yiannes NG	10	4.9	2008	Changing relationship between home and office blood pressure with increasing age in children: the Arsakeion School study	Am J Hypertens	Stergiou GS, Rarra VC, Yiannes NG. Changing relationship between home and office blood pressure with increasing age in children: the Arsakeion School study. Am J Hypertens 2008;21:41-6	B	Prospective cohort study	Children and adolscents	N= 765	6-18 years of age; Greek children participating in the Arsakeion study; Healthy; Caucasian only	1- OBP (using same BP cuff as at home), 4- home BP	N/A	N/A	BP	Yes; 3-measurements	Younger children, age 6-12 years have higher home BP than office BP. This difference is eliminated in older children.	Usefulness of HBP; less expensive option for BP monitoring	None reported	B>H	Non-US population.
PICOT1	229	229	Salgado CM, Jardim PC, Viana JK, Jardim Tde S, Velasquez PP	10	4.9	2011	Home blood pressure in children and adolescents: a comparison with office and ambulatory blood pressure measurements	Acta Paediatr	Salgado CM, Jardim PCBV, Viana JKB, et al. Home blood pressure in children and adolescents: a comparison with office and ambulatory blood pressure measurements. Acta Paediatr 2011;100:e163-8	B	Cross-sectional study	Children and adolescents	N= 108	5-15 years; All from Brazil	1- OBPM; 2- ABPM; 4- Home oscillometric measurement	N/A	N/A	BP	Yes; 3-measurements	ABPM correlates better with home BP than with the office measurement	Usefulness of HBP; less expensive option for BP monitoring	Higher HBP versus ABPM and lack of normative values.	B=H	Non-US population. Study population may not be reflective of US population; standard protocols for HBP assessment do not exist.
PICOT1	230	261	Stergiou GS, Ntineri A, Kollias A, Destounis A, Nasothimiou E, Roussias L	10	4.9	2015	Changing relationship among clinic, home, and ambulatory blood pressure with increasing age	Journal of the American Society of Hypertension : JASH	Stergiou GS, Ntineri A, Kollias A, Destounis A, Nasothimiou E, Roussias L. Changing relationship among clinic, home, and ambulatory blood pressure with increasing age. J Am Soc Hypertens. 2015 Jul;9(7):544-52.	B	Retrospective analysis of prospective data collected b/w 1995-2012	Children, adolescents and adults	N= 642	Patients referred for assessment of hypertension; 5 years to > 60 years	1, 2, 4-manual, home		None	Home BP, Clinic BP, Ambulatory BP measurement	2 sometimes 2 measuresments	In children, dABP is higher than both CBP, and HBP. These differences are eliminated with increasing age. After 30 years of age, dABP is similar to HBP. Both are < CBP.		small sample sizes in each age group	B<H
PICOT1	231	added	Stergiou GS, Yiannes NG, Rarra VC, Panagiotakos DB	10	4.9	2007	Home blood pressure normalcy in children and adolescents: the Arsakeion School study	J Hyperten	Stergiou GS, Yiannes NG, Rarra VC, Panagiotakos DB. Home blood pressure normalcy in children and adolescents: the Arsakeion School study. J Hypertens. 2007 Jul;25(7):1375-9	B	Prospective cohort study	Children and adolescents	N=778	6-18 years of age; Greek children participating in the Arsakeion study; Healthy; Caucasian only	4- Home BP measurements	N/A	N/A	BP	At least 3-measurements	Reliable home BP readings provided by 767 subjects (98%) were analysed. Strong correlations were found between systolic home BP and body height (r = 0.49) and age (r = 0.41), whereas for diastolic BP these correlations were poor (r = 0.11 and 0.08, respectively). The 50th (midpoint of distribution) and the 95th percentile (suggested upper normal limit) for systolic and diastolic home BP in childr…	Knowledge that reliable home BP measurements can be obtained	Lack of reference values and established protocol for home BP assessment	B>H	Non-US population. Study population may not be reflective of US population; standard protocols for HBP assessment do not exist.
PICOT1	232	307	Sorof JM, Turner J, Franco K, Portman RJ	N/A	4.10	2004	Characteristics of hypertensive children identified by primary care referral compared with school-based screening	Journal of Pediatrics	Sorof JM, Turner J, Franco K, Portman RJ. Characteristics of hypertensive children identified by primary care referral compared with school-based screening. J Pediatr. 2004 Apr;144(4):485-9.	B/B MS	Prospective observational study	Children, adolescents and (young) adults	N=44, school screened persons	10 to 19 years of age; Persons with persistently elevated BP: (1) no past anti-hypertensive agent use, (2) no current medication use, (3) height between 115 and 185cm (to allow for ABPM data), (4) HTN defined as average of 3 clinic BP measurements >95th percentile for age, sex and height; Diverse population: White (44%), Hispanic (25%), African American (22%), and Asian (7%)	1	N/A	Persons with clinic diagnosed elevated BP (N=58)	SBP and DBP	Yes	Hypertensive children identified by subspecialty referral are representative of the overall population of hypertensive children in the community, thereby supporting the generalizability of clinic-based research in pediatric hypertension (only gender-male, weight, weight%ile, BMI, BMI%ile were of significantly higher among the referral group compared to the community screened group)	Knowledge of the lack of difference in community identified versus clinic identified hypertensive children (and children with elevated BP)	Potential for bias given small sample size.	B=H	Small sample size.
PICOT1	233	249	King CA, Meadows BB, Engelke MK, Swanson M	N/A	4.10	2006	Prevalence of body mass index and blood pressure in a rural school-aged population: implications for school nurses	Journal of School Health	King CA, Meadows BB, Engelke MK, Swanson M. Prevalence of body mass index and blood pressure in a rural school-aged population: implications for school nurses. Journal of School Health. 2006;76(4):145-149	C	Cross-sectional study	Chilren and Adolescents	N= 1121	5-18 years of age; Single rural school; children in K-11;	4- school/nurse measurement, mercury sphyngomanometer	N/A	N/A	BP	No; 2-measurements	School measurements can be reliable	Convenience of measurement (e.g., school); School nurses important in primary prevention of hypertension	None reported	B>H	Single school.
PICOT1	234	308	Underwood SM, Averhart L, Dean A, Ivalis R, Muluken M, Robinson R, Russ J, Williams M	N/A	`4.10	2012	Clinical evaluation and follow-up of body mass and blood pressure in pre-elementary school children: program review.	J Natl Black Nurses Assoc	Underwood SM, Averhart L, Dean A, Ivalis R, Muluken M, Robinson R, Russ J, Williams M. Clinical evaluation and follow-up of body mass and blood pressure in pre-elementary school children: program review. J Natl Black Nurses Assoc. 2012 Jul;23(1):8-15	B	Retrospective Cross-sectional Stuy	Children	N= 738	<36 months to >5 years of age. Majority (29%) 42 to 47 months of age. School children from 10 urban pre-elementary schools in the Midwestern region of the USA. Multi-race; Low (52%), middle and higher socioeconomic levels reflected. Pre dominantly African American (53%).	4- manual (BP measurements were obtained by "trained" community health workers	N/A	N/A	Manual SBP, manual DBP	No (only 2 measurements); bi-annual health assessment	Higher than expected prevalence of elevated blood pressure/hypertension, especially among children from lower income communities with higher prevalence of overweight/obesity. Although abnormal BP was identified (as was elevated body mass index), there were no notations in the child's school record to indicate these findings or recommendations for further follow-up/intervention.	Identification of factors associated with elevated blood pressure in school age children.	Methods not fully described. Potential for bias toward higher prevlanece of elevated BP if measurements not repeated.	B>H
N/A	235	added	Kapur G, Ahmed M, Pan C, Mitsnefes M, Chiang M, Mattoo TK	11	5.1	2010	Secondary hypertension in overweight and stage 1 hypertensive children: a Midwest Pediatric Nephrology Consortium report	J Clin Hypertens	Kapur G, Ahmed M, Pan C, Mitsnefes M, Chiang M, Mattoo TK. Secondary hypertension in overweight and stage 1 hypertensive children: a Midwest Pediatric Nephrology Consortium report. J Clin Hypertens (Greenwich). 2010 Jan;12(1):34-9	C	Retrospective cohort study	Children	N= 166 (N=151 with primary hypertension and N=15 with secondary hypertension)	Children aged 5–18 years) referred to 4 pediatric nephrology centers of the Midwest Pediatric Nephrology Consortium	Unknown (data pulledfrom retrospectively reviewed data)	N/A	N/A	Demographic features, BP	Unknown	Of the 246 referred patients, 166 patients with primary hypertension (PH) and SH were included for body mass index and hypertension stage analysis. The study revealed no significant differences in the mean age at diagnosis (PH, 13.13.1 years; SH, 12.43.8 years), distribution of overweight (PH, 89.4% BMI >85th percentile; SH, 80% BMI >85th percentile), and stage 1 (PH, 45%; SH, 40%) or 2 hypertens…	Knowledge of factors associated with the diagnosis of secondary hypertension in children	None reported	B>H	Variability in evaluation for hypertension.
N/A	236	added	Flynn JT, Alderman MH	11	5.1	2005	Characteristics of children with primary hypertension seen at a referral center	Pediatr Nephrol.	Flynn JT, Alderman MH. Characteristics of children with primary hypertension seen at a referral center. Pediatr Nephrol. 2005 Jul;20(7):961-6	C	Retrospective cross-sectional study	Children	N =159	Children (<18 years) with hypertension referred to the Pediatric Hypertension Clinic at a single, tertiary center	1- Dinamap	N/A	N/A	Demographic features, BP	Unknown	Family history of hypertension was present in 86.2%, and 52.9% were obese (BMI 95th percentile). BMI was weakly correlated with systolic BP (r =0.28,P =0.10) and was significantly correlated with total cholesterol (r=0.36,P =0.005) and triglycerides (r =0.42,P =0.01). Mean plasma renin activity (PRA) was 3.1€2.7 ng/ml/h. PRA was correlated with diastolic but not systolic BP. Patients with high PR…	Knowledge of factors associated with hypertension in children.	None reported	B>H	Single center study.
N/A	237	added	Gomes RS, Quirino IG, Pereira RM, Vitor BM, Leite AF, Oliveira EA, Simões e Silva A	11	5.1, 5.4	2011	Primary versus secondary hypertension in children followed up at an outpatient tertiary unit	Pediatr Nephrol	Gomes RS, Quirino IG, Pereira RM, Vitor BM, Leite AF, Oliveira EA, Simões e Silva AC. Primary versus secondary hypertension in children followed up at an outpatient tertiary unit. Pediatr Nephrol. 2011 Mar;26(3):441-7	C	Retrospective cohort study	Children	N=220	Children and adolescents (≤18 years) diagnosed with arterial hypertension who were admitted at the Pediatric Nephrology Unit (Federal University of Minas Gerais, Belo Horizonte, Brazil) between August 1996 and December 2006	Unknown	N/A	N/A	Demographic features, BP	Unknown	Of children with primary hypertension, there is no statistically significant difference detected in gender, race, age at diagnosis, and systolic/diastolic blood pressure levels between both groups. After adjustment, four variables at baseline remained independently associated with primary hypertension: absence of signs/symptoms (OR 18.87, 95% CI 6.32–56.29), normal serum creatinine (OR 0.02, 95% …	Knowledge of factors associated with primary hypertension in children	None reported	B>H	Non-US population (Brazillian).
N/A	238	added	Welch WP, Yang W, Taylor-Zapata P, Flynn JT.	11	5.1, 7.3a	2012	Antihypertensive drug use by children: are the drugs labeled and indicated?	J Clin Hypertens	Welch WP, Yang W, Taylor-Zapata P, Flynn JT. Antihypertensive drug use by children: are the drugs labeled and indicated? J Clin Hypertens (Greenwich). 2012 Jun;14(6):388-95.	C	Cross-sectional study (database study)	Children	N= 2,915	Children	Unknown	Anti-hypetensive medications	N/A	Antihypertension agent use in children with primary and secondary hypertension	Unknown	Antihypertensive drugs were used by 889 (34%) children with primary hypertension and 200 children (65%) with secondary hypertension. User rates were 44.3 % in hypertensive children <6y, 30.9 % in those 6-<12y, and 38.1% in those 12-<18 y. 7% of drugs were neither labeled for pediatric use nor considered recommended for use in children In children <6y old, 29% of drugs used were not indicated for …	Knowledge of administration of anti-hypertensive medication in children	None reported	B>H	Relatively small sample size of children actually receiving antihypertensive medications and the lack of data on Medicaid recipients, which may limit the generalizability of the conclusions.
N/A	239	added	Flynn J, Zhang Y, Solar-Yohay S, Shi V	11	5.1, 5.2, 5.4	2012	Clinical and demographic characteristics of children with hypertension	Hypertension	Flynn J, Zhang Y, Solar-Yohay S, Shi V. Clinical and demographic characteristics of children with hypertension. Hypertension. 2012 Oct;60(4):1047-54	C	Cross secctional study (data analysis of data from a RDBPC trial)	Children	N =351	Children participating in data from 2 randomized, doubleblind, multicenter valsartan trials sponsored by a harmaceuticals company (36 centers in 7 countries).	4- aneroid or mercury sphyngomanometer	N/A	N/A	Demographic features, BP	Yes- 3 measurements	Children <6 years old were significantly more likely to have secondary hypertension and were significantly less likely to have weight or body mass index >95 percentile compared with older children. Estimated glomerular filtration rate was significantly lower in children <6 years old (90.9±31.8 mL/min per 1.73 m2 ) than in the other 2 age groups (6 to <12 years, 141.4±42.1 mL/min per 1.73 m2 ; 12 …	Younger children more likely to have secondary hypertension	None reported	B>H	Lack of detailed medical history information.
PICOT2	240	146	Baracco R, Kapur G, Mattoo T, Jain A, Valentini R, Ahmed M, Thomas R	11, 27	5.1, 5.2, 5.4, 11.1	2012	Prediction of Primary vs Secondary Hypertension in Children	Journal of Clinical Hypertension	Baracco R, Kapur G, Mattoo T, Jain A, Valentini R, Ahmed M, Thomas R. Prediction of primary vs secondary hypertension in children. J Clin Hypertens (Greenwich). 2012 May;14(5):316-21.	C/SG and C/SD	Retrospective cohort study	Children	N= 167 (110 with primary HTN and 57 with secondary HTN)	Children 5 to 19 years of age being evaluated for hypertension, those with pre-existing conditions excluded	None	N/A	Comparisons of those with primary and secondary hypertension	Likelihood of having secondary hypertension	No- Less than 3 reported measurements	Patients with secondary hypertension were younger (5–12 years) and had a higher proportion of abnormal creatinine, renal ultrasound, and echocardiogram findings. There was no significant difference in abnormal results of thyroid function, urine catecholamines, plasma renin, and aldosterone. Abnormal renal ultrasound findings and age were predictors of secondary hypertension by regression and like…	Knowledge of the risk factors associated with greater likelihood of seocndary versus primary hypertension in children	N/A	B > H	Retrospective study design.
PICOT4	241	609	Silverstein DM, Champoux E, Aviles DH, Vehaskari VM	N/A	5.2	2006	Treatment of primary and secondary hypertension in children	Pediatric nephrology (Berlin, Germany)	Silverstein DM, Champoux E, Aviles DH, Vehaskari VM. Treatment of primary and secondary hypertension in children. Pediatr Nephrol. 2006 Jun;21(6):820-7.	C	Retrospective cohort study (single center)	Children	N=158	Children with hypertension (mean age :10.8 years; 51%female. 34% with primary hypertension (PHT) and 66% with secondary hypertension(SHT)). African American and Caucasian.	1	Calcium channel blockers and angiotensin converting enzyme inhibitors	N/A	BP (control, SBP and/or DBP less than the 95th percentile)	Yes- at least 3	Antihypertensive therapy is more effective in secondary compared to primary HTN. Following treatment, 26% of PHT patients had a SBP <95th percentile versus 52% of SHT patients. 56% with PHT had a DBP <95th percentile with treatment versus 65.5% with SHT following treatment. CCB and ACEI are effective.	Knowledge of the potential (greater) efficicacy of antihypertensive therapy among persons with SHT versus PHT	Retrospective study. Inabiltiy to confirm appropriate cuff size for obese children (potential bias)	B>H	Slightly higher antihypertensive medication dosing was used in SHT (although this trend was not significant). Children with PHT tended to be older.
PICOT3	242	327	Flynn JT, Meyers KE, Neto JP, de Paula Meneses R, Zurowska A, Bagga A, Mattheyse L, Shi V, Gupte J, Solar-Yohay S, Han G	N/A	9.2, 9.2a, 5.2	2008	Efficacy and safety of the angiotensin receptor blocker valsartan in children with hypertension aged 1 to 5 years	Hypertension	Flynn JT, Meyers KE, Neto JP, de Paula Meneses R, Zurowska A, Bagga A, Mattheyse L, Shi V, Gupte J, Solar-Yohay S, Han G; Pediatric Valsartan Study Group. Efficacy and safety of the Angiotensin receptor blocker valsartan in children with hypertension aged 1 to 5 years. Hypertension. 2008 Aug;52(2):222-8.	A	DB RCT	Children	N= 90	Children 1 to 5 years of age with untreated or inadequately controlled hypertension (mean age of 3.2 years)	1- OBP or 4- mercury or aneroid sphygmanometer	Screening phase: 1 week single bling placebo screening phase; Phase 1: randomized to high, medium, and low dose valsartan for 2 weeks; Phase 2 randomized to placebo or continue valsartan for 2 weeks; Open label phase (52 weeks), dosing of Valsartan to achieve SBP <95th percentile	placebo	blood pressure control and medication side effects	Yes- at least 3 measurements per visit	8.5mmHg decrease in systolic BP, 5.7mmHg decrease in diastolic BP. Minimal side effects.	Valsartan had no demonstrable negative effects on growth and development. Valsartan effectively lowered SBP and DBP compared to placebo	2.2% reported serious adverse events; 5.6% with drug related SAE (but no difference between drug treated and placebo groups)	B>H	Study design. Approximately 20% of participants were taking another antihypertensive agent.
PICOT3/PICOT4	243	354/159	Schaefer F, van de Walle J, Zurowska A, Gimpel C, van Hoeck K, Drozdz D, Montini G, Bagdasorova IV, Sorof J	N/A	9.2, 9.2a, 5.2	2010	Efficacy, safety and pharmacokinetics of candesartan cilexetil in hypertensive children from 1 to less than 6 years of age	Journal of Hypertension	Schaefer F, van de Walle J, Zurowska A, Gimpel C, van Hoeck K, Drozdz D, Montini G, Bagdasorova IV, Sorof J, Sugg J, Teng R, Hainer JW; Candesartan in Children with Hypertension Investigators. Efficacy, safety and pharmacokinetics of candesartan cilexetil in hypertensive children from 1 to less than 6 years of age. J Hypertens. 2010 May;28(5):1083-90.	A	Observational/Cohort	Children 1-5 years (10 patients)	N= 93	HTN	1	high, medium, and low dose candesartan cilexetil for 4 weeks	none	blood pressure	Yes- 3 measurements	At 4 weeks, SBP declined dose dependently by 6, 9 and 12mmHg in the three dose groups (P< 0.01), and DBP by 5, 8 and 11mmHg (P< 0.03). In those patients with proteinuria, 57% median decline in albumin/creatinine ratio @ 4 weeks	Candesartan cilexetil dose-dependently decreases blood pressure and albuminuria in hypertensive infants and is generally well tolerated	N=3 adverse events; N=1, fatigue, N=1 worsening glomerulopathy, N=1 death from acute on chronic renal failure	B>H	Sample size.
PICOT3	244	76	Webb NJ, Wells TG, Shahinfar S, Massaad R, Dankner WM, Lam C, Santoro EP, McCrary Sisk C, Blaustein RO	21	5.2, 7.4a	2014	A randomized, open-label, dose-response study of losartan in hypertensive children	Clin J Am Soc Nephrol	Webb NJ, Wells TG, Shahinfar S, Massaad R, Dankner WM, Lam C, Santoro EP, McCrary Sisk C, Blaustein RO. A randomized, open-label, dose-response study of losartan in hypertensive children. Clin J Am Soc Nephrol. 2014 Aug 7;9(8):1441-8.	A	Randomized, open-label, dose-ranging study	Infants and Children	N= 101	HTN; 6 mo - 6 years	1	Losartan (low-dose,0.1mg/kg/dose), (mid-dose, 0.3mg/kg/dose), (high-dose, 0.7mg/kg/dose)	None	Sitting SBP and DBP	Unknown	Losartan significantly decreased SBP and DBP by week 3 and maintained reduction over 12 weeks and in long-term extension study of 2 years. No dose-response was observed	losartan as an effective anti-hypertensive agent in the treatment of infants with hypertension	N=2 laboratory adverse events	B>H	Short duration of therpay (8 weeks). No placebo control.
PICOT2	245	116	Coleman DM, Eliason JL, Ohye RG, Stanley JC	12	5.3	2012	Long-segment thoracoabdominal aortic occlusions in childhood	J Vasc Surg	Coleman DM, Eliason JL, Ohye RG, Stanley JC. Long-segment thoracoabdominal aortic occlusions in childhood. J Vasc Surg. 2012 Aug;56(2):482-5	D	Case series	Children	N=2	Children with distal thoracic aortic occulsion	Unknown	Surgical repair of aortic occlusion	N/A	N/A	Unknown	2 cases: successful surgical repair of thoracic aorta occlusion	Successful surgical repair of thoracic aortic occlusion	surgical risks	B>H	Case series; single center.
PICOT2	246	added	Lee MG, Kowalski R, Galati JC, Cheung MM, Jones B, Koleff J, d'Udekem Y	12	5.3	2012	Twenty-four-hour ambulatory blood pressure monitoring detects a high prevalence of hypertension late after coarctation repair in patients with hypoplastic arches	J Thorac Cardiovasc Surg	Lee MG, Kowalski R, Galati JC, Cheung MM, Jones B, Koleff J, d'Udekem Y. Twenty-four-hour ambulatory blood pressure monitoring detects a high prevalence of hypertension late after coarctation repair in patients with hypoplastic arches. J Thorac Cardiovasc Surg. 2012 Nov;144(5):1110-6	B	Retrospective Cohort Study	Children, adolescents, and adults	N=62	Australains patients. History of hypoplastic aortic arch and h/o coarctation of the aorta repair in infancy. Median length of time to follow-up of 17 years.	1- OBP, 2- ABPM	N/A	N/A	ABPM, OBP for a diagnosis of hypertension; Number of patients being treated for hypertension	Yes- OBP + ABPM	At ~17 years follow-up: 60% of persons with aortic arch hypoplasia and a history of aortic coarctation have HTN by ABPM; Casual BP assessment underestimates the true prevalence of HTN (only 41% detected by casual BP measurement).	Earlier recognition and treatment of HTN.	Cost of ABPM	B>H	Variability in aortic arch dimensions/degree of hypoplasia.
PICOT2	247	126	Agnoletti G, Bonnet C, Bonnet D, Sidi D, Aggoun Y	12	5.3	2005	Mid-term effects of implanting stents for relief of aortic recoarctation on systemic hypertension, carotid mechanical properties, intimal medial thickness and reflection of the pulse wave	Cardiology in the Young	Agnoletti G, Bonnet C, Bonnet D, Sidi D, Aggoun Y. Mid-term effects of implanting stents for relief of aortic recoarctation on systemic hypertension, carotid mechanical properties, intimal medial thickness and reflection of the pulse wave. Cardiol Young. 2005 Jun;15(3):245-50.	D/D	Case series	Children, adolescents and young adults	N=15	Patients with recoarctation of the aorta; 7-29 year-olds	N/A	Stent placement	N/A	BP at rest and with exercse; Compliance of the carotid arteries	Unknown	Stent placement effected some improvement in BP but did not normalize all vascular parameters. In particular, systemic hypertension did not resolve in persons following stent placement.	Resolution of residual aortic coarctation.	Risks associated with stent placement.	B>H	Study design, and limited sample size.
PICOT2	263	89	Aglony M, Martínez-Aguayo A, Carvajal CA, Campino C, García H, Bancalari R, Bolte L, Avalos C, Loureiro C, Trejo P, Brinkmann K, Giadrosich V, Mericq V, Rocha A, Avila A, Perez V, Inostroza A, Fardella CE	N/A	5.8, Table 10	2011	Frequency of familial hyperaldosteronism type 1 in a hypertensive pediatric population: clinical and biochemical presentation	Hypertension	Aglony M, Martínez-Aguayo A, Carvajal CA, Campino C, García H, Bancalari R, Bolte L, Avalos C, Loureiro C, Trejo P, Brinkmann K, Giadrosich V, Mericq V, Rocha A, Avila A, Perez V, Inostroza A, Fardella CE. Frequency of familial hyperaldosteronism type 1 in a hypertensive pediatric population: clinical and biochemical presentation. Hypertension. 2011 Jun;57(6):1117-21.	C,C	Cross-sectional	Children and adeolescents	N=130	Age 4-16 years; Including Hispanic children	1- oscillometric device	N/A	Plasma potassium, serum aldosterone, plasma renin activity, aldo/renin ratio (ARR)	Prevalence and manifestations of familial hyperaldosteronism type 1 (or GRA)	Yes- 3 measurements	Prevalence was 3% (of 130 hypertensive children). All had stage 2 HTN, high aldosterone, low PRA, and high ARR. 4 additional children, siblings, were identified. 1/8 were normotensive, 1/8 were hypokalemic, 6/8 had elevated serum aldo, all had suppressed plasma renin, and all had ARR >10.	Hypertensive children with aldosterone/renin ratio >10 should have genetic testing for GRA	Individual tests had low sensitivity for diagnosis.	B>H
Table 10	294	added	Rydberg E, Birgander M, Bondeson AG, Bondeson L, Willenheimer R	Table 11	N/A	2010	Effect of successful parathyroidectomy on 24-hour ambulatory blood pressure in patients with primary hyperparathyroidism	Int J Cardiol	Rydberg E, Birgander M, Bondeson AG, Bondeson L, Willenheimer R. Effect of successful parathyroidectomy on 24-hour ambulatory blood pressure in patients with primary hyperparathyroidism. Int J Cardiol. 2010 Jun 25;142(1):15-21	C	Propsective cohort study	Adults	N= 49	Swedish adult with primary hyperparathyroidism referred for parathyroidectomy	2- ABPM	Parathyroidectomy	N/A	Hypertension (ABPM)	N/A- ABPM	Serum concentrations of PTH and calcium were not significantly related to any of the BP variables measured	Knowledge of the relationship between HTN and PTH	No reported harms	B>H	Non-US study. Adults only.
PICOT2	295	added	Gambelunghe A, Sallsten G, Borné Y, Forsgard N, Hedblad B, Nilsson P, Fagerberg B, Engström G, Barregard L	N/A	5.5	2016	Low-level exposure to lead, blood pressure, and hypertension in a population-based cohort	Environ Res	Gambelunghe A, Sallsten G, Borné Y, Forsgard N, Hedblad B, Nilsson P, Fagerberg B, Engström G, Barregard L. Low-level exposure to lead, blood pressure, and hypertension in a population-based cohort. Environ Res. 2016 Aug;149:157-63	C	Cross-sectional study	Adults	N= 4452	Swedish adults exposed to lead	4- mercury sphyngomanometer	N/A	Lowest lead exposure group	BP (diagnosis of hypertension or receipt of antihypertensive medication)	Unknown	Blood lead in the fourth quartile was associated with significantly higher systolic and diastolic blood pressure (point estimates: 1–2 mmHg) and increased prevalence of hypertension (odds ratio: 1.3, 95% confidence interval: 1.1–1.5) versus the other quartiles after adjustment for sex, age, smoking, alcohol, waist circumference, and education	Knowledge of the association between lead exposure and hypertension	Analysis limited by study design (survey)	B>H	Adult study. Time of exposure not recorded. Unclear impact of lead on BP in children. Swedish children.
PICOT2	296	added	Lee BK, Ahn J, Kim NS, Lee CB, Park J, Kim Y	N/A	5.5	2012	Association of Blood Pressure with Exposure to Lead and Cadmium: Analysis of Data from the 2008-2013 Korean National Health and Nutrition Examination Survey	Biol Trace Elem Res	Lee BK, Ahn J, Kim NS, Lee CB, Park J, Kim Y. Association of Blood Pressure with Exposure to Lead and Cadmium: Analysis of Data from the 2008-2013 Korean National Health and Nutrition Examination Survey. Biol Trace Elem Res. 2016 Nov;174(1):40-51	C	Cross-sectional study	Adults	N= 11, 979	South Korean adults (at least 19 years of age); Korean National Health and Nutrition Examination Survey 2008-2013	4- mercury sphyngomanometer	N/A	N/A	Blood lead and cadmium levels; BP	Yes- 3 measurements	Doubling of the lead level was associated with increased risk of hypertension (OR 1.09, 95% CI: 0.98-1.22). Doubling of the blood cadmium level was significantly associated with increased risk of hypertension (OR 1.25, 95% CI: 1.15-1.36). Combined effects of lead and cadmium on blood pressure are higher than either agent alone.	Knoweledge of the potential impact of lead and cadmium on BP (among adults)	None reported	B>H	Non-US population. Study population limited to individuals who completed the survey (thus a potential for selection bias). Adults only (younger patients studied tended to have lower lead and cadmium levels). Also, the Korean National Health and Nutrition Examination Survey reports higher lead levels than the US National Health and Nutrition Examination Survey (2011-2012).
PICOT2	297	added	Rapisarda V, Ledda C, Ferrante M, Fiore M, Cocuzza S, Bracci M, Fenga C	N/A	5.5	2016	Blood pressure and occupational exposure to noise and lead (Pb): A cross-sectional study	Toxicol Ind Health	Rapisarda V, Ledda C, Ferrante M, Fiore M, Cocuzza S, Bracci M, Fenga C. Blood pressure and occupational exposure to noise and lead (Pb): A cross-sectional study. Toxicol Ind Health. 2016 Oct;32(10):1729-36	C	Cross-sectional study	Adults	N= 105	Male workers at a lead battery recycling plant	4- mercury sphyngomanometer	N/A	N/A	Noise exposure, lead levels and BP	Yes- 3 measurements	Blood pressure does not correlate with noise exposure but does correlate with lead exposure	Knowledge of the association between lead and BP	None reported	B>H	Adults only. Small sample size.
PICOT2	298	added	Hara A, Thijs L, Asayama K, Gu YM, Jacobs L, Zhang ZY, Liu YP, Nawrot TS, Staessen JA	N/A	5.5	2015	Blood pressure in relation to environmental lead exposure in the national health and nutrition examination survey 2003 to 2010	Hypertension	Hara A, Thijs L, Asayama K, Gu YM, Jacobs L, Zhang ZY, Liu YP, Nawrot TS, Staessen JA. Blood pressure in relation to environmental lead exposure in the national health and nutrition examination survey 2003 to 2010. Hypertension. 2015 Jan;65(1):62-9	C	Cross-sectional study	Adults	N= 12,725	NHANES participants, 1999-2012; multi-ethnic and multi-racial	Unknown	N/A	N/A	BP	No- in some cases less than 3 measurements	Doubling of blood lead levels associated with higher SBP and DBP, but not with a diagnosis of hypertension.	Knowledge of the association between lead and BP. Declining lead levels over time.	None reported	B>H	Study design. Blood lead levels do not reflect total body lead levels (most lead is stored in the bones).
PICOT2	299	added	Gump BB, Reihman J, Stewart P, Lonky E, Darvill T, Matthews KA	N/A	5.5	2007	Blood lead (Pb) levels: a potential environmental mechanism explaining the relation between socioeconomic status and cardiovascular reactivity in children	Health Psychol	Gump BB, Reihman J, Stewart P, Lonky E, Darvill T, Matthews KA. Blood lead (Pb) levels: a potential environmental mechanism explaining the relation between socioeconomic status and cardiovascular reactivity in children. Health Psychol. 2007 May;26(3):296-304	C	Cross-sectional study	Children	N= 122	Participants of a longitudinal study of the effects of environmental toxicant on development (participants of the Oswego Children's Study); 9.5-year-old children	2-ABPM	N/A	N/A	BP	N/A- ABPM	Higher blood lead levels and lower socioeconomic status (SES) were associated with heightened systolic blood pressure and diastolic blood pressure. The authors also found that such exposures are also associated with greater total peripheral resistance (TPR) response to acute stress	knowledge of the association between lead levels, socioeconcomic status	None reported	B>H	Study design.
PICOT2	300	added	Chen A, Rhoads GG, Cai B, Salganik M, Rogan WJ	N/A	5.5	2006	The effect of chelation on blood pressure in lead-exposed children: a randomized study	Environ Health Perspect	Chen A, Rhoads GG, Cai B, Salganik M, Rogan WJ. The effect of chelation on blood pressure in lead-exposed children: a randomized study. Environ Health Perspect. 2006 Apr;114(4):579-83	A	RCT	Children	N= 780	Participants in the Treatment of Lead-Exposed Children(TLC) trial, median age= 2 years. Moderate lead levels of 20-44 mcg/dl to test the effect of chelation on cognitive function and behavior	1- Dinamap	Chelation therapy	No chelation therapy	BP	No - 2 measurements	Overall, there is no association between blood lead and blood pressure in these children with moderately high lead exposure, nor does chelation with succimer change blood pressure	Knowledge of the association between lead and BP	None reported	B>H
PICOT2	301	added	Chen X, Zhu G, Lei L, Jin T	N/A	5.5	2013	The association between blood pressure and blood cadmium in a Chinese population living in cadmium polluted area	Environ Toxicol Pharmacol	Chen X, Zhu G, Lei L, Jin T. The association between blood pressure and blood cadmium in a Chinese population living in cadmium polluted area. Environ Toxicol Pharmacol. 2013 Sep;36(2):595-9	C	Cross-sectional study	Adults	N= 181	Chinese adults living near a cadmium smelter	4- wrist device	N/A	N/A	BP	No- 2 measurements	Cadium exposure is particularly associated with hypertension in women	Knowledge of the relationship between cadmium and hypertension	None reported	B>H	Adult study. Non US population.
PICOT2	302	added	Tellez-Plaza M, Navas-Acien A, Crainiceanu CM, Guallar E	N/A	5.5	2008	Cadmium exposure and hypertension in the 1999-2004 National Health and Nutrition Examination Survey (NHANES)	Environ Health Perspect	Tellez-Plaza M, Navas-Acien A, Crainiceanu CM, Guallar E. Cadmium exposure and hypertension in the 1999-2004 National Health and Nutrition Examination Survey (NHANES). Environ Health Perspect. 2008 Jan;116(1):51-6	C	Cross-sectional study	Adults	N= 10,991	NHANES 1999–2004 participants	4- mercury sphyngomanometer	N/A	N/A	BP	Yes- 3 measurements	Cadmium levels in blood, but not in urine, were associated with a modest elevation in blood pressure levels	Knowledge of the relationship between cadmium and hypertension	None reported	B>H	Adult study.
PICOT2	304	added	Swaddiwudhipong W, Mahasakpan P, Jeekeeree W, Funkhiew T, Sanjum R, Apiwatpaiboon T, Phopueng I	N/A	5.5	2015	Renal and blood pressure effects from environmental cadmium exposure in Thai children	Environ Res	Swaddiwudhipong W, Mahasakpan P, Jeekeeree W, Funkhiew T, Sanjum R, Apiwatpaiboon T, Phopueng I. Renal and blood pressure effects from environmental cadmium exposure in Thai children. Environ Res. 2015 Jan;136:82-7	B	Case control	Children	Case, N=301; Controls, N= 293	Children from contaminated regions	Unknown	N/A	Children from non contaminated reghions	BP	Unknown	Provide evidence that environmental cadmium exposure can affect renal functions in children.	Knowledge of relationship between cadmium and blood pressure	Cadmium exposure can affect renal tubules in children	B<H	Non-US study.
PICOT2	305	added	Cao Y, Chen A, Radcliffe J, Dietrich KN, Jones RL, Caldwell K, Rogan WJ	N/A	5.5	2009	Postnatal cadmium exposure, neurodevelopment, and blood pressure in children at 2, 5, and 7 years of age	Environ Health Perspect	Cao Y, Chen A, Radcliffe J, Dietrich KN, Jones RL, Caldwell K, Rogan WJ. Postnatal cadmium exposure, neurodevelopment, and blood pressure in children at 2, 5, and 7 years of age. Environ Health Perspect. 2009 Oct;117(10):1580-6	B	Prospective cohort (data from a RCT)	Children	N= 675	Children exposed to cadmium; 2, 5, and 7 years of age	N/A	N/A	N/A	Neurodevelopmental outcomes and BP at 2, 5, and 7 years	Unknown	No significant associations between background blood cadmium levels at 2 years of age and neurodevelopmental end points and blood pressure at 2, 5, and 7 years of age	No relaionshipe between background cadmium levels at 2 years of age and neurodevelopmental outcomes and 2, 5, and 7 years	None reported	B<H	Length of follow-up time may have been insufficient to charactertize cadmium exposure on neurodevelopmental outcome.
PICOT2	309	added	Brannan EH, Su S, Alverson BK	N/A	5.5	2012	Elemental mercury poisoning presenting as hypertension in a young child	Pediatr Emerg Care	Brannan EH, Su S, Alverson BK. Elemental mercury poisoning presenting as hypertension in a young child. Pediatr Emerg Care. 2012 Aug;28(8):812-4	D	Case report	Child	N=1	Child exposed to mercury	Unknown	Chelation therapy: dimercaptosuccinic acid (DMSA) 16 mg/kg divided twice daily + HTN control with labetolol and amlodipine	N/A	BP	Unknown	Clinical presentation of mercury poisoning: HTN, tachycardia, diaphoresis, irritability, acrodynia, elevated catecholamine levels without evidence of tumor on imaging	Knowledge of the clinical presentation of mercury intoxication and the relationship to high blood pressure, although rare	Toxicity of mercury	B<H	Case report.
PICOT2	310	added	Mercer JJ, Bercovitch L, Muglia JJ	N/A	5.5	2012	Acrodynia and hypertension in a young girl secondary to elemental mercury toxicity acquired in the home	Pediatr Dermatol	Mercer JJ, Bercovitch L, Muglia JJ. Acrodynia and hypertension in a young girl secondary to elemental mercury toxicity acquired in the home. Pediatr Dermatol. 2012 Mar-Apr;29(2):199-201	D	Case report	Child	N=1	Child exposed to mercury	Unknown	Chelation therapy x 2 weeks	N/A	BP	Unknown	Clinical presentation of mercury poisoning (source of exposure: carpet): elevated metanephrine levels but no evidence of a pheochromocytoma, acrodynia (peeling of fingers and toes consistent with Kawasaki disease), hypertension	Knowledge of the relationship between	Toxicity of mercury	B<H	Case report.
PICOT2	311	added	Valvi D, Casas M, Romaguera D, Monfort N, Ventura R, Martinez D, Sunyer J, Vrijheid M	N/A	5.5	2015	Prenatal Phthalate Exposure and Childhood Growth and Blood Pressure: Evidence from the Spanish INMA-Sabadell Birth Cohort Study	Environ Health Perspect	Valvi D, Casas M, Romaguera D, Monfort N, Ventura R, Martinez D, Sunyer J, Vrijheid M. Prenatal Phthalate Exposure and Childhood Growth and Blood Pressure: Evidence from the Spanish INMA-Sabadell Birth Cohort Study. Environ Health Perspect. 2015 Oct;123(10):1022-9	B	Prospective cohort study	Children	N= 391	Spanish population-based birth cohort sutdy (Infancia y Medio Ambiente)	1	N/A	N/A	BP	No- at least 1 measurement	Sum of five high-molecular-weight phthalate metaboliteswas associated with significantly lower systolic BP z-scores in girls for all ages combined , but associations were not significant in boys	Knowledge of the relationship between phthlate levels and BP	None reported	B>H	Single BP measurement. Non-US population.
PICOT2	312	added	Trasande L, Sathyanarayana S, Spanier AJ, Trachtman H, Attina TM, Urbina EM	N/A	5.5	2013	Urinary phthalates are associated with higher blood pressure in childhood	J Pediatr	Trasande L, Sathyanarayana S, Spanier AJ, Trachtman H, Attina TM, Urbina EM. Urinary phthalates are associated with higher blood pressure in childhood. J Pediatr. 2013 Sep;163(3):747-53	C	Cross-sectional study	Children	N= 2447	Children 6-19 years of age; NHANES participants	4- aneroid sphyngomanometer	N/A	N/A	BP	Yes- at least 3 measurements	Levels of metabolites of DEHP, a phthalate commonly found in processed foods, were associated with higher age-, sex-, and height-standardized BP. For each log unit (roughly 3-fold) increase in DEHP metabolites resulted in a 0.041 SD unit increase in systolic BP z-score (P = .047).	Knowledge of the relationship between phthlate levels and BP	None reported	B>H	Cross-sectional study. No causality, only association.
PICOT2	313	added	Trasande L, Attina TM	N/A	5.5	2005	Association of exposure to di-2-ethylhexylphthalate replacements with increased blood pressure in children and adolescents	Hypertension	Trasande L, Attina TM. Association of exposure to di-2-ethylhexylphthalate replacements with increased blood pressure in children and adolescents. Hypertension. 2015 Aug;66(2):301-8	C	Cross-sectional study	Children	N= 1619	Children 6-19 years of age; NHANES participants	4- aneroid sphyngomanometer	N/A	N/A	BP	Yes- at least 3 measurements	Metabolites of low molecular weight phthalates commonly found in cosmetics and personal care products showed an association with blood pressure (.90th percentile) in univariate analysis, but this was no longer significant in our full multivariable model	Knowledge of the relationship between phthlate levels and BP	None reported	B>H	Cros- sectional study. No causality, only association.
PICOT2	314	added	Saif I, Seriki D, Moore R, Woywodt A	N/A	5.6	2010	Midaortic syndrome in neurofibromatosis type 1 resulting in bilateral renal artery stenosis	Am J Kidney Dis	Saif I, Seriki D, Moore R, Woywodt A. Midaortic syndrome in neurofibromatosis type 1 resulting in bilateral renal artery stenosis. Am J Kidney Dis. 2010 Dec;56(6):1197-201	D	Case report	Adult	N= 1	24 year old woman with Neurofibromatosis	Unknown	N/A	N/A	BP	Unknown	Association between mid aortic syndorme and NF-1	Knowledge of the association between NF-1 and midaortic syndrome	Difficult to control BP	B>H	Case report.
PICOT2	315	added	Kimura M, Kakizaki S, Kawano K, Sato S, Kure S	N/A	5.6	2013	Neurofibromatosis type 1 complicated by atypical coarctation of the thoracic aorta	Case Rep Pediatr	Kimura M, Kakizaki S, Kawano K, Sato S, Kure S. Neurofibromatosis type 1 complicated by atypical coarctation of the thoracic aorta. Case Rep Pediatr. 2013;2013:458543	D	Case report	Child	N= 1	4 year old girl	Unknown	N/A	N/A	BP	Unknown	Association between mid aortic syndorme and NF-1	Knowledge of the association between NF-1 and midaortic syndrome	Difficult to control BP	B>H	Case report.
PICOT2	316	added	Malav IC, Kothari SS	N/A	5.6	2009	Renal artery stenosis due to neurofibromatosis	Ann Pediatr Cardiol	Malav IC, Kothari SS. Renal artery stenosis due to neurofibromatosis. Ann Pediatr Cardiol. 2009 Jul;2(2):167-9	D	Case report	Child	N= 1	4 year old boy	Unknown	N/A	N/A	BP	Unknown	Association between NF-1 and renal artery stenosis	Knowledge of the association between NF-1 and renal artery stenosis	Difficult to control BP	B>H	Case report.
PICOT2	317	added	Mavani G, Kesar V, Devita MV, Rosenstock JL, Michelis MF, Schwimmer JA	N/A	5.6	2014	Neurofibromatosis type 1-associated hypertension secondary to coarctation of the thoracic aorta	Clin Kidney J	Mavani G, Kesar V, Devita MV, Rosenstock JL, Michelis MF, Schwimmer JA. Neurofibromatosis type 1-associated hypertension secondary to coarctation of the thoracic aorta. Clin Kidney J. 2014 Aug;7(4):394-5	D	Case report	Adult	N= 1	24 year old woman	Unknown	N/A	N/A	BP	Unknown	Association between NF-1 and coarctation of the aorta	Knowledge of the association between NF-1 and coarctation	Difficult to control BP	B>H	Case report.
PICOT2	318	160	Duan L, Feng K, Tong A, Liang Z	N/A	5.6	2014	Renal artery stenosis due to neurofibromatosis type 1: case report and literature review	European journal of medical research	Duan L, Feng K, Tong A, Liang Z. Renal artery stenosis due to neurofibromatosis type 1: case report and literature review. Eur J Med Res. 2014 Mar 28;19:17.	D/EO	Case report	Adolescent	N= 1	16 year old boy	4- mercury sphyngomanometer	nifedipne	N/A	BP	Unknown	Neurofibromatosis as a cause for renal artery stenosis	Knowledge of association between neurofibromatosis and renal artery stenosis	N/A	B>H	Case report.
PICOT2	319	added	Srinivasan A, Krishnamurthy G, Fontalvo-Herazo L, Nijs E, Meyers K, Kaplan B, Cahill AM	N/A	5.6	2011	Spectrum of renal findings in pediatric fibromuscular dysplasia and neurofibromatosis type 1	Pediatr Radiol	Srinivasan A, Krishnamurthy G, Fontalvo-Herazo L, Nijs E, Meyers K, Kaplan B, Cahill AM. Spectrum of renal findings in pediatric fibromuscular dysplasia and neurofibromatosis type 1. Pediatr Radiol. 2011 Mar;41(3):308-16	C	Retrospective cohort study	Children	N=43 (N=68 renal angiograms)	Children with renovascular hypertension and evidence of renal artery stenosis by renal angiogram; 1 month to 19 years of age	Unknown	N/A	N/A	Renal angiographic findings in pediatric fibromuscular dysplasia (FMD) and neurofibromatosis type 1(NF1)	Unknown	The more common condition associated with renal artery stenosis among those with RAS by angiogram is fibromuscular dysplasia (33/43) versus (10/43) with NF-1. Stenosis was found in 91% of patients (n=39/43), with 86% showing stenosis of 1st or 2nd order arteries, and 12% distal to 2nd order. Stenoses in multiple 1st/2nd order arteries were found in 32% of patients, and 36/43 patients had 1-2 sten…	Knowledge of the association between RAS , NF-1 and FMD. Also knowledge of the most common distributions of renal artery and aortic disease.	None reported	B>H	None.
PICOT2	320	added	Dubov T, Toledano-Alhadef H, Chernin G, Constantini S, Cleper R, Ben-Shachar S	N/A	5.6	2016	High prevalence of elevated blood pressure among children with neurofibromatosis type 1	Pediatr Nephrol	Dubov T, Toledano-Alhadef H, Chernin G, Constantini S, Cleper R, Ben-Shachar S. High prevalence of elevated blood pressure among children with neurofibromatosis type 1. Pediatr Nephrol. 2016 Jan;31(1):131-6	C	Cross-sectional study	Children	N= 269	Children, 2-17 years of age with Neurofibromatosis-1	1	N/A	N/A	BP	Yes- 1 to 8 measurements on 3 or more occasions	Seven of the 114 children (6.1 %) with at least three BP measurements ondifferent visits were found to have HTN.	Knowledge of the prevalence of hypertension in children with NF-1	None reported	B>H	Cross-sectional study.
PICOT2	321	added	Erem C, Onder Ersöz H, Ukinç K, Hacihasanoglu A, Alhan E, Cobanoğlu U, Koçak M, Erdöl H	N/A	5.6	2007	Neurofibromatosis type 1 associated with pheochromocytoma: a case report and a review of the literature	J Endocrinol Invest	Erem C, Onder Ersöz H, Ukinç K, Hacihasanoglu A, Alhan E, Cobanoğlu U, Koçak M, Erdöl H. Neurofibromatosis type 1 associated with pheochromocytoma: a case report and a review of the literature. J Endocrinol Invest. 2007 Jan;30(1):59-64	D	Case report	Adult	N= 1	30 year old man	Unknown	N/A	N/A	Diagnosis of pheochromocytoma	Unknown	Association between pheochromocytoma and NF-1	Knowledge of an adrenal mass in patients with NF-1 should raise the suspicion of pheochromocytoma	None reported	B>H	Case report.
PICOT2	322	added	Zinnamosca L, Petramala L, Cotesta D, Marinelli C, Schina M, Cianci R, Giustini S, Sciomer S, Anastasi E, Calvieri S, De Toma G, Letizia C	N/A	5.6	2011	Neurofibromatosis type 1 (NF1) and pheochromocytoma: prevalence, clinical and cardiovascular aspects	Arch Dermatol Res	Zinnamosca L, Petramala L, Cotesta D, Marinelli C, Schina M, Cianci R, Giustini S, Sciomer S, Anastasi E, Calvieri S, De Toma G, Letizia C. Neurofibromatosis type 1 (NF1) and pheochromocytoma: prevalence, clinical and cardiovascular aspects. Arch Dermatol Res. 2011 Jul;303(5):317-25	C	Cohort study	Adults	N= 48	Adults with NF-1	2- ABPM	N/A	N/A	BPl, hypertension	N/A- ABPM	In NF1 patients, 11 (29.3%) had arterial hypertension, 7 (14.6%) had a pheochromocytoma. Nocturnal non-dipping pattern at the ABPM was present in 40.4% of NF1 patients, and in particular this phenomenon was present in PHEO-NF1 patients (71.4%).	Knowledge of the prevalence of arterial hypertension among persons with NF-1	None reported	B>H	None.
PICOT2	323	added	Nawrot TS, Den Hond E, Fagard RH, Hoppenbrouwers K, Staessen JA	N/A	5.7	2003	Blood pressure, serum total cholesterol and contraceptive pill use in 17-year-old girls	Eur J Cardiovasc Prev Rehabil	Nawrot TS, Den Hond E, Fagard RH, Hoppenbrouwers K, Staessen JA. Blood pressure, serum total cholesterol and contraceptive pill use in 17-year-old girls. Eur J Cardiovasc Prev Rehabil. 2003 Dec;10(6):438-42	C	Cross-sectional study	Children	N= 120	Adolescents taking oral contraceptive pills; 17.4+/-0.8 years	4-manual BP	N/A	N/A	BP	Yes- at least 3 measurements	Use of oral contraceptives is associated with an increase in systolic blood pressure by 4–5mmHg	Knowledge of potential relationship between OCP use and BP	None reported	B>H	None.
PICOT2	324	added	Le-Ha C, Beilin LJ, Burrows S, Huang RC, Oddy WH, Hands B, Mori TA	N/A	5.7	2013	Oral contraceptive use in girls and alcohol consumption in boys are associated with increased blood pressure in late adolescence	Eur J Prev Cardiol	Le-Ha C, Beilin LJ, Burrows S, Huang RC, Oddy WH, Hands B, Mori TA. Oral contraceptive use in girls and alcohol consumption in boys are associated with increased blood pressure in late adolescence. Eur J Prev Cardiol. 2013 Dec;20(6):947-55	C	Cross-sectional study	Children	N= 1248	Raine study participants; asdolescents; Australian; 17 years of age	1	N/A	No OCP users (femaie); no alccohol users, normal weight individuals	BP	Yes- 5 measurements	Lifestyle-related health behaviours such as high salt intake for both sexes, consumption of alcohol in boys, and OC use in girls were important factors associated with BP measurements in late adolescence	Relationship between lifestyle and BP	OCP use associated with higher BP	B > H	Cross-sectional study. Non-US population.
PICOT2	325	added	Du Y, Rosner BM, Knopf H, Schwarz S, Dören M, Scheidt-Nave C	N/A	5.7	2011	Hormonal contraceptive use among adolescent girls in Germany in relation to health behavior and biological cardiovascular risk factors	J Adolesc Health	Du Y, Rosner BM, Knopf H, Schwarz S, Dören M, Scheidt-Nave C. Hormonal contraceptive use among adolescent girls in Germany in relation to health behavior and biological cardiovascular risk factors. J Adolesc Health. 2011 Apr;48(4):331-7	C	Retrospective database study	Children	N= 2285	Children and adolescents aged 0–17 years living in Germany. Members of German Health Interview and Examination Survey for Children and Adolescents (KiGGS)	1	N/A	N/A	BP	No- 2 measurements	Relative contributions of HC use ranged from 1% for systolic and diastolic blood pressure to 12% for hs-CRP.	Knowledge of the relationship between hormonal contraception use and HTN	None reported	B>H	Non-US population.
PICOT2	326	added	Samuels JA, Franco K, Wan F, Sorof JM	N/A	5.7	2006	Effect of stimulants on 24-h ambulatory blood pressure in children with ADHD: a double-blind, randomized, cross-over trial	Pediatr Nephrol	Samuels JA, Franco K, Wan F, Sorof JM. Effect of stimulants on 24-h ambulatory blood pressure in children with ADHD: a double-blind, randomized, cross-over trial. Pediatr Nephrol. 2006 Jan;21(1):92-5	C	Double-blind, randomized, cross-over trial	Children	N= 17	Children 5-15 years of age	2- ABPM	N/A	N/A	BP	N/A- ABPM	Total diastolic blood pressure (69.7 mmHg vs 65.8 mmHg, p=0.02) and waking diastolic blood pressure (75.5 mmHg vs 72.3 mmHg, p=0.03) were significantly higher during active treatment	Knowledge of the relationship between DBP and stimulant use	Elevated BP	B>H	Small sample size (eg, N=11 participants).
PICOT2	327	added	Covar RA, Leung DY, McCormick D, Steelman J, Zeitler P, Spahn JD	N/A	5.7	2000	Risk factors associated with glucocorticoid-induced adverse effects in children with severe asthma	J Allergy Clin Immunol	Covar RA, Leung DY, McCormick D, Steelman J, Zeitler P, Spahn JD. Risk factors associated with glucocorticoid-induced adverse effects in children with severe asthma. J Allergy Clin Immunol. 2000 Oct;106(4):651-9	C	Retrospective chart review	Children	N= 163	Children 9 years ofage or older with severe asthma admitted to the National Jewish Medical and Research Center from July 1993 to February 1997	Unknown	N/A	N/A	BP	Unknown	88% of glucocorticoid recipients develop hypertension	Knowledge of the relationship between GC use and HTN	HTN among GC recipients	B>H	Inadequate blood pressure assessment.
N/A	330	added	Staley JR, Bradley J, Silverwood RJ, Howe LD, Tilling K, Lawlor DA, Macdonald-Wallis C	13	6.2A, 6.3	2015	Associations of blood pressure in pregnancy with offspring blood pressure trajectories during childhood and adolescence	J Am Heart Assoc	Staley JR, Bradley J, Silverwood RJ, Howe LD, Tilling K, Lawlor DA, Macdonald-Wallis C. Associations of blood pressure in pregnancy with offspring blood pressure trajectories during childhood and adolescence: findings from a prospective study. J Am Heart Assoc. 2015 May 20;4(5)	B	Prospective longitudinal study	Children	N=6619 maternal–offspring pairs	Children 7-17 years of age who are the offspring of women participating in the Avon Longitudinal Study of Parents and Children (ALSPAC)	1- Dinamap	N/A	Offspring of normotensive mothers	BP	No- 2 measurements (but over 7 visit)	After adjusting for maternal and offspring variables, including body mass index, offspring of women who had existing hypertension, gestational hypertension, or preeclampsia during pregnancy had on average higher BP at age 7 years compared to offspring of normotensive pregnancies (mean difference [95%CI] in systolic BP: 1.67 mm Hg [0.48, 2.86], 1.98 mm Hg [1.32, 2.65], and 1.22 mm Hg [ 0.52, 2.97]…	Knowledge of impact of maternal BP on offspring BP	Biased conclusion. Unclear if there is a genetic predisposition	B>H	Significant loss to follow-up. Measurements of BP both in the mothers and the offspring were taken using different measuring devices and by different observers.
PICOT2	331	added	Daniels SD, Meyer RA, Loggie JM	N/A	6.2b	1990	Determinants of cardiac involvement in children and adolescents with essential hypertension	Circulation	Daniels SD, Meyer RA, Loggie JM. Determinants of cardiac involvement in children and adolescents with essential hypertension. Circulation. 1990 Oct;82(4):1243-8	B	Cross-sectional study	Children	N= 104	Children with BP consistently above the 90th precentile (without an identifiable cause); single center study; mean age 14.9 years; range 6-23 years	Unknown	N/A	N/A	LVH (Devereux equation)	Unknown	Prevalence of hypertension was 38.5%. Signififcant predictors of increased LVMI include: male gender, BMI, dietary sodium intake, age at diagnosis, and SBP	Knowledge of predictors of LVH in children	None reported	B>H	Limited sample size.
PICOT2	332	added	Yang Q, Zhang Z, Kuklina EV, Fang J, Ayala C, Hong Y, Loustalot F, Dai S, Gunn JP, Tian N, Cogswell ME, Merritt R	13; 20	6.2b, 7.2	2012	Sodium intake and blood pressure among US children and adolescents	Pediatrics	Yang Q, Zhang Z, Kuklina EV, Fang J, Ayala C, Hong Y, Loustalot F, Dai S, Gunn JP, Tian N, Cogswell ME, Merritt R. Sodium intake and blood pressure among US children and adolescents. Pediatrics. 2012 Oct;130(4):611-9	C	Cross-sectional study	Children and adolescents	N= 6235	NHANES, 2003-2008; 8 to 18 years of age	4- sphyngomanometer	N/A	N/A	BP, mg of sodium intake	Yes- 3 measurements	1. Study subjects consumed an average 3387g/day of Na; 2. Each 1000mg increase in Na intake per day was associated with an increased SD score of 0.097 in SBP among all subjects and 0.141 increase among overweight/obese subjects; 3. Na intake is positively associated with SBP and risk for preHTN, HTN among children in the US	Knowledge of the impact of increased Na intake on BP in children	No harms reported	B>H	NHANES.
PICOT3	334	214	Aeberli I, Spinas GA, Lehmann R, l'Allemand D, Molinari L, Zimmermann MB	N/A	6.2b	2009	Diet determines features of the metabolic syndrome in 6- to 14-year-old children	International Journal for Vitamin and Nutrition Research	Aeberli I, Spinas GA, Lehmann R, l'Allemand D, Molinari L, Zimmermann MB. Diet determines features of the metabolic syndrome in 6- to 14-year-old children. Int J Vitam Nutr Res. 2009 Jan;79(1):14-23.	C	Observational	Children	N= 79	Overweight, obese; Child: 6-14 years old	4- manual BP	Nutritional Intake assessment	Normal weight	Clinic BP - manual, insulin resistance, leptin, resistin, adiponectin	Unknown	SBP correlated with total fat intake, saturated fatty acids, and monounsaturated FA. Obesity was related with increased fasting insulin, leptin, SBP, protein and meat intake and reduced insulin resistance.	Knowledge of the relationship between diet and blood pressure	None reported	B>H	Non-US population.
PICOT2	335	added	Colín-Ramírez E, Castillo-Martínez L, Orea-Tejeda A, Villa Romero AR, Vergara Castañeda A, Asensio Lafuente E	N/A	6.2b	2009	Waist circumference and fat intake are associated with high blood pressure in Mexican children aged 8 to 10 years	J Am Diet Assoc	Colín-Ramírez E, Castillo-Martínez L, Orea-Tejeda A, Villa Romero AR, Vergara Castañeda A, Asensio Lafuente E. Waist circumference and fat intake are associated with high blood pressure in Mexican children aged 8 to 10 years. J Am Diet Assoc. 2009 Jun;109(6):996-1003	C	Cross-sectional study	Children	N= 1239	Mexican children from 23 public schools, 8 to 10 years of age	4- aneroid sphyngomanometer	N/A	N/A	BP	No- 2 measurements	3.6% had isolated systolic HTN, 14.2% had isolated diastolic HTN, and 22.8% had mixed hypertension. Higher body mass index and waiste circumference were associated with combined HTN.	Knowledge of the relationship between body mass and blood pressure	None reported	B>H	Non-US population.
PICOT2	336	added	Niinikoski H, Jula A, Viikari J, Rönnemaa T, Heino P, Lagström H, Jokinen E, Simell O	N/A	6.2b	2009	Blood pressure is lower in children and adolescents with a low-saturated-fat diet since infancy: the special turku coronary risk factor intervention project	Hypertension	Niinikoski H, Jula A, Viikari J, Rönnemaa T, Heino P, Lagström H, Jokinen E, Simell O. Blood pressure is lower in children and adolescents with a low-saturated-fat diet since infancy: the special turku coronary risk factor intervention project. Hypertension. 2009 Jun;53(6):918-24	B	Prospective study	Children	N= 540	Finish children, participants of the Special Turku Coronary Risk Factor Intervention Project Study	1	N/A	N/A	BP	No- 2 (to 4) measurements	Systolic and diastolic blood pressures were 1.0 mm Hg lower (95% CI for systolic: −1.7 to −0.2 mm Hg; 95% CI for diastolic: −1.5 to −0.4 mm Hg) in children receiving low-saturated-fat counseling through childhood than in control children. Intakes of saturated fat were lower (P<0.001), those of polyunsaturated fat higher (P<0.001), and intakes of potassium slightly higher (P=0.002) in the interven…	Knowledge of the potential impact of dietary counseling throughout childhood on blood pressure. Supervised dietary counseling to restrict saturated fat intake and to increase unsaturated fat, vegetable, and fruit intake from infancy until 15 years of age significantly decreases childhood systolic and diastolic BPs	None reported	B>H	Non-US population.
PICOT4	339	148	Rebholz CM, Gu D, Chen J, Huang JF, Cao J, Chen JC, Li J, Lu F, Mu J, Ma J, Hu D, Ji X, Bazzano LA, Liu D, He J; GenSalt Collaborative Research Group	N/A	6.2c	2012	Physical activity reduces salt sensitivity of blood pressure: the Genetic Epidemiology Network of Salt Sensitivity Study	Am J Epidemiol	Rebholz CM, Gu D, Chen J, Huang JF, Cao J, Chen JC, Li J, Lu F, Mu J, Ma J, Hu D, Ji X, Bazzano LA, Liu D, He J; GenSalt Collaborative Research Group.. Physical activity reduces salt sensitivity of blood pressure: the Genetic Epidemiology Network of Salt Sensitivity Study. Am J Epidemiol. 2012 Oct 1;176 Suppl 7:S106-13	B	Prospective cohort study	Adolescents and adults	N= 1906	Chinese adults (> 16 years of age)	Unknown	Low salt diet to high salt intervention	N/A	Salt sensitivity	Unknown	Physical activity is significantly, independently, and inversely related to salt sensitivity of BP and may be particularly effective in lowering BP among salt-sensitive individuals	Knowledge of impact of physical activity in salt sensitive individuals	None reported	B>H	Non-US population; adult study.
PICOT3	341	289	Chen HH, Chen YL, Huang CY, Lee SD, Chen SC, Kuo CH	13, 20, 28, 29	6.2c, 7.2b, 11.2	2010	Effects of one-year swimming training on blood pressure and insulin sensitivity in mild hypertensive young patients	The Chinese journal of physiology	Chen HH, Chen YL, Huang CY, Lee SD, Chen SC, Kuo CH. Effects of one-year swimming training on blood pressure and insulin sensitivity in mild hypertensive young patients. The Chinese journal of physiology. Jun 30 2010;53(3):185-189	C	Prospective cohort study	Adults	Total N=23; N=7 mildly hpertensive adults	Chinese, healthy young adults; 21-23 years of age	4- Mercury sphyngomanometer	1 year swimming program, progressive increase in distance from 0 to 7km	Normotensive adults, N=16	Weight, height, BMI, BP (e.g., SBP, DBP), homostasis model assessment of insulin resistance (HOMA-IR),	2- neasurements	No change in weight, BMI, DBP or HOMA-IR following 1 year. Slight reduction in plasma glucose level after 1 year.	Minimal + impact of 1 year of swimming on weight, BMI, DBP, and HOMA.	N/A	B>H	Small sample size and non reflective of US population. Only office measurements of BP were obtained.
PICOT3	342	495	Farpour-Lambert NJ, Aggoun Y, Marchand LM, Martin XE, Herrmann FR and Beghetti M	20	6.2c, 7.2b	2009	Physical activity reduces systemic blood pressure and improves early markers of atherosclerosis in pre-pubertal obese children	J Am Coll Cardiol	Farpour-Lambert NJ, Aggoun Y, Marchand LM, Martin XE, Herrmann FR and Beghetti M. Physical activity reduces systemic blood pressure and improves early markers of atherosclerosis in pre-pubertal obese children. J Am Coll Cardiol. 2009;54:2396-406	B	RCT	Children	Total, N=44; N=22 obese children randomized to exercise treatment	Pre-pubertal, 6-11 years; Swiss children only (no race or altnerative ethnicity indicated)	2 ABPM	3 months of exercise: 3-60minutes exercise sessions per week (30min cardiovascular with goal VO2 55-65% predicted+ 20min strengthening +10minutes of stretching)	N=22 lean children; N=22 obese children (no exercise intervention)	CIMT, ABPM	N/A (ABPM)	Significant reduction in BP in prepubertal children following 3 months of exercise (as determined by ABPM)	Exercise may be beneificial in all children for lowering BP	None	B>H	Small sample size; Population not reflective of entire US population.
PICOT2	345	added	van Dijk AE, van Eijsden M, Stronks K, Gemke RJ, Vrijkotte TG	N/A	6.2d	2012	The association between prenatal psychosocial stress and blood pressure in the child at age 5-7 years	PLoS One	van Dijk AE, van Eijsden M, Stronks K, Gemke RJ, Vrijkotte TG. The association between prenatal psychosocial stress and blood pressure in the child at age 5-7 years. PLoS One. 2012;7(8):e43548	B	Prospective study	Children	N= 2968	Children of mothers participiting in the Amsterdam Born Children and their Development (ABCD) study	1	N/A	N/A	BP among children (mean age 5.7 years); matneral questionaire related to the presence of pregnancy related anxiety, depressive symptoms, anxiety levels by State-Trait Anxiety Inventory, Job anxiety, Cumulative stress score measured on average around gestational week 16	No- 2 measurements	After adjustment for confounders, the single stress scales were not associated with systolic and diastolic BP, MAP and hypertension (p.0.05). The presence of 3–4 psychosocial stressors prenatally (4%) was associated with 1.5 mmHg higher systolic and diastolic BP (p = 0.046; p = 0.04) and 1.5 mmHg higher MAP in the offspring (p = 0.02) compared to no stressors (46%). The presence of 3–4 stressors …	Knowledge of the association betwewn prenatal stress (in the mother) and childhood (around 5 years of age) hypertension	Mulitple stressors during pregnancy are associated with hypertension in children	B<H	Non-US populaiton. Single assessment (~16 weeks during pregnancy). Many women with depressive symptoms were not included.
PICOT2	346	added	Stein DJ, Scott K, Haro Abad JM, Aguilar-Gaxiola S, Alonso J, Angermeyer M, Demytteneare K, de Girolamo G, Iwata N, Posada-Villa J, Kovess V, Lara C, Ormel J, Kessler RC, Von Korff M	N/A	6.2d	2010	Early childhood adversity and later hypertension: data from the World Mental Health Survey	Ann Clin Psychiatry	Stein DJ, Scott K, Haro Abad JM, Aguilar-Gaxiola S, Alonso J, Angermeyer M, Demytteneare K, de Girolamo G, Iwata N, Posada-Villa J, Kovess V, Lara C, Ormel J, Kessler RC, Von Korff M. Early childhood adversity and later hypertension: data from the World Mental Health Survey. Ann Clin Psychiatry. 2010 Feb;22(1):19-28	C	Cross-sectional (survey) study	Adults	N= 3215	Multi-national (10 countries including the United States)	Unknown	N/A	N/A	Adult onset HTN; survey of childhood stressors Including (physical abuse, sexual abuse, neglect, parental death/divorce/loss, parental mental disorder, parental substance abuse, parental criminal behavior, family violence, family economic diversity	Unknown	Two or more early childhood adversities, as well as early-onset depression-anxiety,are associated with hypertension during childhood. Early-onset social phobia and panic/agoraphobia are significantly associated with hypertension. In multivariate analyses, the presence of 3 or more childhood adversities is associated with hypertension, even when early-onset depression-anxiety or current depression…	Knowledge of the potential relationshiop betwee early childhood stressors and adult onset hypertension	Multiple childhood srressors are associated with the adult onset of hypertension	B<H	Survey study.
PICOT2	347	added	Halonen JI, Stenholm S, Pentti J, Kawachi I, Subramanian SV, Kivimäki M, Vahtera J	N/A	6.2d	2015	Childhood Psychosocial Adversity and Adult Neighborhood Disadvantage as Predictors of Cardiovascular Disease: A Cohort Study	Circulation	Halonen JI, Stenholm S, Pentti J, Kawachi I, Subramanian SV, Kivimäki M, Vahtera J. Childhood Psychosocial Adversity and Adult Neighborhood Disadvantage as Predictors of Cardiovascular Disease: A Cohort Study. Circulation. 2015 Aug 4;132(5):371-9	C	Cross-sectional study	Adults	N= 37,699	Finish Public Sector members	Unknown	N/A	N/A	Adults receiving antihypertensive therapy	Unknown	Exposure to high childhood psychosocial adversity and high adult neighborhood disadvantage was associated with a doubling of the risk of incident CVD in adulthood compared with the absence of such exposures	Knowledge of the impact of childhood stressors on adult cardiovascular disease outcome	Knowledge of the relationshipd between childhood stressors and future cardiovascular disease risk	B>H	Survey study. Non-US study.
PICOT2	348	added	Maggio AB, Martin XE, Saunders Gasser C, Gal-Duding C, Beghetti M, Farpour-Lambert NJ, Chamay-Weber C	N/A	6.2d	2014	Medical and non-medical complications among children and adolescents with excessive body weight	BMC Pediatr	Maggio AB, Martin XE, Saunders Gasser C, Gal-Duding C, Beghetti M, Farpour-Lambert NJ, Chamay-Weber C. Medical and non-medical complications among children and adolescents with excessive body weight. BMC Pediatr. 2014 Sep 14;14:232	C	Cohort study	Children	N= 774	Children with obesity; Participants of Pediatric Obesity Care Center; Age(s): 1.7 - 17.9 yrs, mean age 11.1 ± 3.0	1	N/A	N/A	BP and other markers of metabolic syndrome	Yes- 3 measurements	23% of participants had either systolic or diastolic hypertension.The great majority of the children suffered from at least one medical complication. Orthopedic pathologies were the most frequent (54%), followed by metabolic (42%) and cardiovascular disturbances (31%). However, non-medical conditions related to well-being, such as bullying, psychological complaints, shortness of breath or abnorma…	Knowledge of common complications associated with childhood obesity.	High prevalence of complications (medical and psychosocial) among obese children	B<H	None reported.
PICOT2	349	added	Yun M, Li S, Sun D, Ge S, Lai CC, Fernandez C, Chen W, Srinivasan SR, Berenson GS	N/A	6.2d	2015	Tobacco smoking strengthens the association of elevated blood pressure with arterial stiffness: the Bogalusa Heart Study	J Hypertens	Yun M, Li S, Sun D, Ge S, Lai CC, Fernandez C, Chen W, Srinivasan SR, Berenson GS. Tobacco smoking strengthens the association of elevated blood pressure with arterial stiffness: the Bogalusa Heart Study. J Hypertens. 2015 Feb;33(2):266-74	C	Cross-sectional study	Adults	N= 945	Persons living in Bogaluse Louisiana with at least 4-15 childhood blood pressure measurements. Multi-race study.	4- mercury sphyngomonometer	N/A	N/A	Arterial stiffness (adulthood) via aorto-femoral pulse wave velocity	Yes- 6 measurements	Increased adult afPWV was significantly associated with higher adulthood (p<0.001), total AUC (p<0.001) and incremental AUC (p<0.001) values of systolic and diastolic BP, but not with childhood BP, after adjusting for age, race, gender, body mass index and heart rate	Knowledge that childhood BP is not associated with adult PWV.	Smoking as a significant predictor of adult PWV.	B<H	Cross-sectional study design.
PICOT2	350	added	Priest JR, Nead KT, Wehner MR, Cooke JP, Leeper NJ	N/A	6.2d	2014	Self-reported history of childhood smoking is associated with an increased risk for peripheral arterial disease independent of lifetime smoking burden	PLoS One	Priest JR, Nead KT, Wehner MR, Cooke JP, Leeper NJ. Self-reported history of childhood smoking is associated with an increased risk for peripheral arterial disease independent of lifetime smoking burden. PLoS One. 2014 Feb 18;9(2):e88972	C	Cross-sectional study	Adults	N= 1537	Participants in the Genetic Determinants of Peripheral Vascular Disease study	Unknown	N/A	N/A	Peripheral artery disease	Unknown	Smoking during childhood associated with the development of peripheral artery disease later in life	Knowledge of the association between childhood smoking and PAD in adulthood	PAD in adults who smoked as children	B<H	Cross-sectional study
PICOT2	352	added	Benson L, Baer HJ, Greco PJ, Kaelber DC	N/A	6.2e	2010	When is family history obtained? - Lack of timely documentation of family history among overweight and hypertensive paediatric patients	J Paediatr Child Health	Benson L, Baer HJ, Greco PJ, Kaelber DC. When is family history obtained? - Lack of timely documentation of family history among overweight and hypertensive paediatric patients. J Paediatr Child Health. 2010 Oct;46(10):600-5	C	Retrospective cohort study	Children	N= 6259	5485 overweight/obese and 774 hypertensive children	Unknown	N/A	N/A	Recorded family history of hypertension	Unknown	Paediatric providers may not use family history as a screening tool for assessing future risk of obesity and hypertension, but instead gather this information after these chronic conditions have developed, making it difficult to implement preventative or screening strategies based on familial risk	Knowledge of the frequency of recorded family history of hypertension	Very limited recording of family history of hypertension by PCP	B<H	Single center study.
PICOT1	354	294	Wiesen J, Adkins M, Fortune S, Horowitz J, Pincus N, Frank R, Vento S, Hoffman C, Goilav B, Trachtman H	13	6.4, Table 13	2008	Evaluation of pediatric patients with mild-to-moderate hypertension: yield of diagnostic testing	Pediatrics	Wiesen J, Adkins M, Fortune S, Horowitz J, Pincus N, Frank R, Vento S, Hoffman C, Goilav B, Trachtman H. Evaluation of pediatric patients with mild-to-moderate hypertension: yield of diagnostic testing. Pediatrics. 2008 Nov;122(5):e988-93.	B/JD - C	Retrospective chart review	Children	N= 249	None/ JD - Obese; Children with hypertension; between July 2002 and June 2007; aged 13.3 +/- 4.4 years	2	N/A	N/A	To demonstratet that comprehensive tests to r/o secondary HTN do not have a high enough yield to warrant performance for all children with borderline BP.	N/A	Routine urinalysis and serum biochemical profile do not have diagnostic utility for a child with mild-to-moderate hypertension. The only blood test that had a significant yield of abnormal results was the fasting lipid profile. Renal ultrasound did not yield a lot of abnormalities so may be reserved for patients with abnormal ABPM or where there is a high degree of clinical suspicion of renal abn…	yes	No	B<H	For PICO 1: ABPM was not evaluated in standard way to compare to clinic BP.
PICOT2	355	added	Yoon EY, Cohn L, Rocchini A, Kershaw D, Freed G, Ascione F, Clark S diagnostic tests in adolescents with essential hypertension. Arch Pediatr Adolesc	14/15	6.5	2012	Use of diagnostic tests in adolescents with essential hypertension	Arch Pediatr Adolesc	Yoon EY, Cohn L, Rocchini A, Kershaw D, Freed G, Ascione F, Clark S. Use of diagnostic tests in adolescents with essential hypertension. Arch Pediatr Adolesc Med. 2012 Sep;166(9):857-62.	C	Cross-sectional study	Adolescents	N=951	Diagnosis of hypertension; 12- 18y, eligible for Michigan Medicaid for at least3 to 6 years during the period of 2003 to 2008	N/A	N/A	N/A	Echocardiogram, Renal ultrasound, EKG	Unknown	During the study period: 25% with essential hypertension who had an antihypertensive prescription had at least 1 echocardiogram or least 1 renal ultrasound; 50% of adolescents with essential hypertension who had an antihypertensive prescrition had at least 1 EKG	Unknown	Unknown	B=H	Michigan only.
PICOT2	356	added	Killian L, Simpson JM, Savis A, Rawlins D, Sinha MD	14/15	6.5	2010	Electrocardiography is a poor screening test to detect left ventricular hypertrophy in children	Arch Dis Child	Killian L, Simpson JM, Savis A, Rawlins D, Sinha MD. Electrocardiography is a poor screening test to detect left ventricular hypertrophy in children. Arch Dis Child. 2010 Oct;95(10):832-6.	C	Proscpective cohort study	Children	N=99	Children with chronic kidney disease (predialysis and postrenal transplantation)	N/A	N/A	N/A	LVH by ECG (blinded read), LVH (using Devereux equation) by echocardiogram (using 3 methods: LVMI> 38.6g/m2.7, LVMI3.4/kg, LVMI>88.9g/m2)	Unknown	Sensitity of ECG for detecting LVH (regardlless of method used was low) <13%; Sensitivity of echo for detecting LVH was 68 to 76% and specificity of 43 to 77%.	Low	False reassurance.	B<H
PICOT2	357	added	Ramaswamy P, Patel E, Fahey M, Mahgerefteh J, Lytrivi ID, Kupferman JC	14/15	6.5	2009	Electrocardiographic predictors of left ventricular hypertrophy in pediatric hypertension	J Pediatr	Ramaswamy P, Patel E, Fahey M, Mahgerefteh J, Lytrivi ID, Kupferman JC. Electrocardiographic predictors of left ventricular hypertrophy in pediatric hypertension. J Pediatr. 2009 Jan;154(1):106-10.	C	Case Control study	Children	N=108	HTN/LVH (by pediatric and adult echo criteria (see findings))	Unknown	N/A	HTN no LVH	LVH by ECG (1. By S wave V1>98th, 2. V6 >98th, 3 sum of S in V1 and R in V6, 4. Q in V6 >98th, 5. inverted T in V6 and LVH by echocardiogram (Devereux equation, indexed to ht^2.7); LVH if LVMI >36.88g/m2.7 females, >39.36 g/m2.7 males, >51g/m2.7 for adults	Unknown	32% w/ LVH by pediatric criteria and 7.4% by adult criteria; Note: BMI was significantly higher in the LVH group. ROC: AUC <0.7 for all ECG measures for identifying LVH	ECG is less expensive and more easily performed	Missed diagnosis of LVH	B<H	Recall bias.
PICOT2	358	added	Rijnbeek PR, van Herpen G, Kapusta L, Ten Harkel AD, Witsenburg M, Kors JA	14/15	6.5	2008	Electrocardiographic criteria for left ventricular hypertrophy in children	Pediatri Cardiol	Rijnbeek PR, van Herpen G, Kapusta L, Ten Harkel AD, Witsenburg M, Kors JA. Electrocardiographic criteria for left ventricular hypertrophy in children. Pediatr Cardiol. 2008 Sep;29(5):923-8.	C	Cross-sectional	Children	N=904	Children with LVH by echocardiogram	Unknown	N/A	N/A	LVH by echo (LVM by Devereux formula >3); LVH by ECG usig EXPLORE induction algorithm (searches the decision rule for the highest sensitivity at a user specified level of specificity)	Unknown	ECG poor sensitivity for detecting LVH	ECG is less expensive and more easily performed	Missed diagnosis of LVH	B<H
PICOT2	359	added	Grossman A, Prokupetz A, Koren-Morag N, Grossman E, Shamiss A	14/15	6.5	2012	Comparison of usefulness of Sokolow and Cornell criteria for left ventricular hypertrophy in subjects aged <20 years versus >30 years	Am J Cardiol.	Grossman A, Prokupetz A, Koren-Morag N, Grossman E, Shamiss A. Comparison of usefulness of Sokolow and Cornell criteria for left ventricular hypertrophy in subjects aged <20 years versus >30 years. Am J Cardiol. 2012 Aug 1;110(3):440-4.	C	Case-Control	Young adults	N=~6000	Age <20 years; Young adults (less than 20 years); Israeli military recruits	4- Mercury sphygmomanometer	N/A	Age >30 years	LVH by Ecg and by Echo	2 measurements	ECG is a poor test for diagnosing LVH	ECG is less expensive and more easily performed	Missed diagnosis of LVH	B<H	Recall bias.
PICOT3	360	added	Caselli S, Maron MS, Urbano-Moral J a., Pandian NG, Maron BJ, Pelliccia A	28, 29	11.2	2014	Differentiating Left Ventricular Hypertrophy in Athletes from That in Patients With Hypertrophic Cardiomyopathy	Am J Cardiol	Caselli S, Maron MS, Urbano-Moral J a., Pandian NG, Maron BJ, Pelliccia A. Differentiating Left Ventricular Hypertrophy in Athletes from That in Patients With Hypertrophic Cardiomyopathy. Am J Cardiol. 2014;114(9):1383-1389	C	Cross-sectional study	Adults	Total N=53, N=28 cases	18 to 40 years of age; Athletes and persons with HCM	N/A	Unknown	N/A	LV wall and internal dimensions by echocarddiogram; left atrium dimensions, LV filling pressure; family history	Unknown	Athletes: LVID >55mm, LA dimension >40mm, normal LV filling, absent inverted T wave; negative family history of HCM	Clinical characteristics for differentiating HCM affected persons from athletes	None reported	B>H	Adults only.
PICOT2	361	added	Urbina EM, Gidding SS, Bao W, Pickoff AS, Berdusis K, Berenson GS.	15	6.6	1995	Effect of body size, ponderosity, and blood pressure on left ventricular growth in children and young adults in the Bogalusa Heart Study	Circulation	Urbina EM, Gidding SS, Bao W, Pickoff AS, Berdusis K, Berenson GS. Effect of body size, ponderosity, and blood pressure on left ventricular growth in children and young adults in the Bogalusa Heart Study. Circulation 1995;91:2400-2406	C	Cross-sectional	Children, adolescents and young adults	N=160 (Bogalusa heart study); 9 to 22 years of age,	All races	4- Mercury sphyngomanometer	N/A	N/A	left ventricular mass (LVM), LVM indexed to HT ^2.7 after 4-5 years of follow-up	> 3 measurements	Determinants of LVM at follow-up, 4-5 years later: age, height, weight , ponderosity index (Wt/Ht^3), tricep skinfold thickness (TSFT) for females only, SBP, DBP ;; LVMI at follow-up was associated with: age (females only), Wt, PI, TSFT, SBP (females only); In multivariate analysis, only weight was a significant predictor of LVM	N/A	N/A	N/A
PICOT2	362	added	Kuznetsova, Tatiana; Haddad, Francois; Tikhonoff, Valérie; Kloch-Badelek, Malgorzata; Ryabikov, Andrew; Knez, Judita; Malyutina, Sofia; Stolarz-Skrzypek, Katarzyna; Thijs, Lutgarde; Schnittger, Ingela; Wu, Joseph C.; Casiglia, Edoardo; Narkiewicz, Krzysztof; Kawecka-Jaszcz, Kalina; Staessen, Jan A.; on behalf of the European Project On Genes in Hypertension (EPOGH) Investigators	15	6.6	2016	Impact and pitfalls of scaling of left ventricular and atrial structure in population-based studies	Journal of Hypertension	Kuznetsova T, Haddad F, Tikhonoff V, Kloch-Badelek M, Ryabikov A, Knez J, Malyutina S, Stolarz-Skrzypek K, Thijs L, Schnittger I, Wu JC, Casiglia E, Narkiewicz K, Kawecka-Jaszcz K, Staessen JA; European Project On Genes in Hypertension (EPOGH) Investigators. Impact and pitfalls of scaling of left ventricular and atrial structure in population-based studies. J Hypertens. 2016 Jun;34(6):1186-94.	C	Cross-sectional	Adults	N= 1509, 25% with hypertension on medication; Northern Belgium study population participating in the FLAMENGHO and EPOCH studies	Non- US population	Unknown	N/A	non-hypertensive participants	Indexing of LVEDD, LVEDV, LVM and LAV by BSA, height and estimated lean body mass	Unknown	Higher index measurements when LVEDD nd LVEDV are indexed by height; good agreement between LVH, LVE and LVEDV after indexing by BSA or estimated lean body mass; Indexing of LVM or LAE by BSA underestimates the prevalence of LVH among obese persons	Better methods for indexing measures of left heart dimension by body sizze and gender			Few morbidly obese patients.
PICOT2	364	added	Armstrong AC, Jacobs DR Jr, Gidding SS, Colangelo LA, Gjesdal O, Lewis CE, Bibbins-Domingo K, Sidney S, Schreiner PJ, Williams OD, Goff DC Jr, Liu K, Lima JA	15	6.6	2014	Framingham score and LV mass predict events in young adults: CARDIA study	Int J Cardiol	Armstrong AC, Jacobs DR Jr, Gidding SS, Colangelo LA, Gjesdal O, Lewis CE, Bibbins-Domingo K, Sidney S, Schreiner PJ, Williams OD, Goff DC Jr, Liu K, Lima JA. Framingham score and LV mass predict events in young adults: CARDIA study. Int J Cardiol. 2014 Mar 15;172(2):350-5	B	Prospective cohort study	Adults	N= 118	Biracial cohort of young adults followed over 20 years as a part of the CARDIA study	Unknown	N/A	N/A	Framingham risk score, echocardiogram findings of LVH	Unknown	In African-American and White adults at ages 22 to 36 years, the FRS showed good performance predicting global cardiovascular events over 20 years of follow-up. LVM can independently predict CV events, modestly improve discrimination, and also effectively reclassify participants beyond the FRS. Event incidence (n = 118) across FRS groups was, respectively, 1.3%, 5.4%, and 23.1% (p<0.001); and was…	Knowledge of methods for assessing CVD risk using non-invasive measures	None	B>H	Limited sample size.
PICOT2	365	added	Gidding SS, Palermo RA, DeLoach SS, Keith SW, Falkner B	15	6.6	2014	Association of Cardiac Structure with Obesity, Blood Pressure, Inflammation, and Insulin Resistance in African-American Adolescents	Pediatr. Cardiol	Gidding SS, Palermo RA, DeLoach SS, Keith SW, Falkner B. Association of Cardiac Structure with Obesity, Blood Pressure, Inflammation, and Insulin Resistance in African-American Adolescents. Pediatr. Cardiol. 2014 Feb; 35(2):307-314	C	Cross-sectional	Adolescents	N= 301; 13 to 18 years	African American youth	4- Mercury sphyngomanometer	N/A	N/A	LVH and indexed left atrial dimension (LADI) by echo, homeostatis model of insulin resistance, hs CRP, IL-6, PA-1, TNF-alpha	3 measurements and ABPM	24% of youth with LVH; Biomarkers (ie., HOMA, hs CRP, etc) were not associated with increased LVMI or LADI; LADI and LVMI were associated with female gender, BMI, SBP	N/A	N/A	N/A	Study design: observational.
PICOT2	366	added	Hanevold C, Waller J, Daniels S, Portman R, Sorof J	15	6.6	2004	The effects of obesity, gender, and ethnic group on left ventricular hypertrophy and geometry in hypertensive children: a collaborative study of the International Pediatric Hypertension Association	Pediatrics	Hanevold C, Waller J, Daniels S, Portman R, Sorof J; International Pediatric Hypertension Association. The effects of obesity, gender, and ethnic group on left ventricular hypertrophy and geometry in hypertensive children: a collaborative study of the International Pediatric Hypertension Association. Pediatrics. 2004 Feb;113(2):328-33	C	Cross-sectional study	Adolescents	N=129	Hypertensive children (treated and untreated), 13-15 years of age	Unknown (oscillometric or manual) but using 95th percentiles	N/A	N/A	Echocardiogram (LV chamber and wall dimensions).	3- measurements	41% of children with LVH using the LVMI >95th percentile cutoff, mean mass of 37.7 +/- 11.7g/m2.7; 16% with LVH using adult criteria; 5% with eccentric hypertrophy; 18% with concentric remodelling	N/A	N/A	N/A	Small sample size; no control for obesity status and other factors contributing to LVH.
PICOT2	367	added	Daniels SR, Loggie JM, Khoury P, Kimball TR	15	6.6	1998	Left ventricular geometry and severe left ventricular hypertrophy in children and adolescents with essential hypertension	Circulation	Daniels SR, Loggie JM, Khoury P, Kimball TR. Left ventricular geometry and severe left ventricular hypertrophy in children and adolescents with essential hypertension. Circulation. 1998 May 19;97(19):1907-11	C	Cross-sectional study	Children, adolescents and young adults	N=130	Essential hypertension; , 6-23 years of age	4- Mercury sphyngomanometer	N/A	N/A	Echocardiogram (LV chamber and wall dimensions).	3- measurements	8% with LVMI >51.1g/m2.7; An additional 6% had LV mass between the 99th percentile and the cutpoint; therefore, 14% of the patients had severe LV hypertrophy	N/A	N/A	N/A
PICOT2	368	added	Devereux RB, Wachtell K, Gerdts E, Boman K, Nieminen MS, Papademetriou V, Rokkedal J, Harris K, Aurup P, Dahlöf B	15	6.6	2004	Prognostic significance of left ventricular mass change during treatment of hypertension	JAMA	Devereux RB, Wachtell K, Gerdts E, Boman K, Nieminen MS, Papademetriou V, Rokkedal J, Harris K, Aurup P, Dahlöf B. Prognostic significance of left ventricular mass change during treatment of hypertension. JAMA. 2004 Nov 17;292(19):2350-6.	C	Prospective cohort study (following RCT)	Adults	N=960	Adults 55 to 80 years of age; Participants of the LIFE study; LIFE study enrolled patients with hypertension and electrocardiographic LVH in a prospective, double-blind,multicenter, randomized study to determine whether greater reduction in CV eventsis achieved bylosartan-based thanatenolol-based treatment; More than 10% of LIFE participants enrolled in a substudy in which echocardiograms were pe…	Unknown	Atenolol, Losartan	N/A	LVMI	Not reported (see original LIFE study)	Patients with lower LVMI on annual echocardiograms during treatment were 22% less likely to experience the composite end point of cardiovascular morbidity and mortality during 4.6 years of follow-up for each 1-SD (25.3) decrease in in-treatment LVMI	Treatment of BP --> improved LVH and decreased CVD related morbidilty, mortality
PICOT2	370	added	Daniels SR, Kimball TR, Morrison JA, Khoury P, Witt S, Meyer RA	15	6.6	1995	Effect of lean body mass, fat mass, blood pressure, and sexual maturation on left ventricular mass in children and adolescents. Statistical, biological, and clinical significance	Circulation	Daniels SR, Kimball TR, Morrison JA, Khoury P, Witt S, Meyer RA. Effect of lean body mass, fat mass, blood pressure, and sexual maturation on left ventricular mass in children and adolescents. Statistical, biological, and clinical significance. Circulation. 1995 Dec 1;92(11):3249-54	C	Cross-sectional study	Children and adolescents	N=120	Only children with normal exam and echocardiogram; 6 to 17 years of age	4- Mercury sphyngomanometer	N/A	N/A	Anthropometric Measurements, Dual Energy X-Ray Absorptiometry, Blood Pressure, Sexual Maturation, Echocardiographic Measurements	3- measurements	Lean body mass, fat mass, and systolic blood pressure all have a statistically significant independent association with left ventricular mass, suggesting that all three play an important biological role in determining left ventricular mass	N/A	N/A	N/A
PICOT2	372	added	Foster BJ, Khoury PR, Kimball TR, Mackie AS, Mitsnefes M	15	6.6	2016	New Reference Centiles for Left Ventricular Mass Relative to Lean Body Mass in Children	J Am Soc Echocardiogr	Foster BJ, Khoury PR, Kimball TR, Mackie AS, Mitsnefes M. New Reference Centiles for Left Ventricular Mass Relative to Lean Body Mass in Children. J Am Soc Echocardiogr. 2016 May;29(5):441-447	C	Retrospective cohort study	Children and adolescents	N= 1710	Children and adolescents 5 to 18 years of age	Unknown	N/A	N/A	LVH, measurements by different techniques	Unknown	Among 231 children at risk for LVH, on average, relative LV mass was higher using the LV mass index-for-age percentile method than the LV mass-for-LBM percentile method. LVH was more likely to be diagnosed among overweight children and less likely among thin children	Knowledge of prevalence of LVH by different measurments	Risk of underreporting (or overreporting of LVH)	B>H	No long-term prospective data.
PICOT2	376	added	Elmenhorst J, Hulpke-Wette M, Barta C, Dalla Pozza R, Springer S and Oberhoffer R	N/A	6.7	2015	Percentiles for central blood pressure and pulse wave velocity in children and adolescents recorded with an oscillometric device	Atherosclerosis	Elmenhorst J, Hulpke-Wette M, Barta C, Dalla Pozza R, Springer S and Oberhoffer R. Percentiles for central blood pressure and pulse wave velocity in children and adolescents recorded with an oscillometric device. Atherosclerosis. 2015;238:9-16	C	Cross-sectional study	Children, adolescents and adults	N=2227	German children (no race or altnerative ethnicity indicated); 8 to 22 years of age	1- oscillometric;2-ABPM	N/A	N/A	PWV, ABPM, BP	N/A (ABPM)	Pulse wave mesurements	Normative data	None reported	B>H	Population may not be representative of US population.
PICOT2	377	added	Hidvegi EV, Illyes M, Benczur B, Bocskei RM, Ratgeber L, Lenkey Z, Molnar FT and Cziraki A	N/A	6.7	2012	Reference values of aortic pulse wave velocity in a large healthy population aged between 3 and 18 years	J Clin Hypertens	Hidvegi EV, Illyes M, Benczur B, Bocskei RM, Ratgeber L, Lenkey Z, Molnar FT and Cziraki A. Reference values of aortic pulse wave velocity in a large healthy population aged between 3 and 18 years. J Hypertens. 2012;30:2314-21	C	Cross-sectional study	Childrens and adolescents	N=3,374	Hungarian children (no race or alternative ehtnicity indicated); 3-18 years of age	N/A	N/A	N/A	PWV	N/A	Mean PWVao values increased from 5.5 0.3 to 6.5 0.3 m/s (P < 0.05) in boys and from 5.6 0.3 to 6.4 0.3 m/s (P < 0.05) in girls	Normative data	Noe reported	B>H	Population may not be representative of US population.
PICOT2	378	added	Miyai N, Utsumi M, Gowa Y, Igarashi Y, Miyashita K, Takeda S and Arita M	N/A	6.7	2013	Age-specific nomogram of brachial-ankle pulse wave velocity in Japanese adolescents	Clin Exp Hypertens	Miyai N, Utsumi M, Gowa Y, Igarashi Y, Miyashita K, Takeda S and Arita M. Age-specific nomogram of brachial-ankle pulse wave velocity in Japanese adolescents. Clin Exp Hypertens. 2013;35:95-101	C	Cross-sectional study	Children and adolescents	N= 3215	Japanese patients only (no race or alternative ethnicity indicated); 3-18 years of age	1- Oscillometric	N/A	N/A	brachial-ankle pulse wave velocity	2-measurements	Ankle-brachial artery measurements in Japanese children	Normative data	Noe reported	B>H	Population may not be representative of US population.
PICOT2	379	added	Urbina EM, Khoury PR, McCoy CE, Dolan LM, Daniels SR and Kimball TR	N/A	6.7	2013	Triglyceride to HDL-C ratio and increased arterial stiffness in children, adolescents, and young adults	Pediatrics	Urbina EM, Khoury PR, McCoy CE, Dolan LM, Daniels SR and Kimball TR. Triglyceride to HDL-C ratio and increased arterial stiffness in children, adolescents, and young adults. Pediatrics. 2013;131:e1082-90	C	Cross seectional study	Children, adolescents and adults	N=893	Persons with type 2 DM (and non diabetic controls); , 10 to 26 years of age	N/A	N/A	N/A	Questionnaire, anthropometric, blood pressure (BP), laboratory, and arterial stiffness data	N/A	When stratified by tertile, arterial stiffness increased across TG/HDLC tertile groups with significantly higher PWV and lower BrachD; The prevalence of abnormalities in BrachD and PWV were significantly higher in the high TG/HDL-C tertile (P for x 2 ,.0001 for both)	Knowledge of relationship between PWV and dyslipidemia	None reported	B>H	Population not fully described (? generlizability).
PICOT2	380	added	Lurbe E, Torro I, Garcia-Vicent C, Alvarez J, Fernandez-Fornoso JA and Redon J	N/A	6.7	2012	Blood pressure and obesity exert independent influences on pulse wave velocity in youth	Hypertension	Lurbe E, Torro I, Garcia-Vicent C, Alvarez J, Fernandez-Fornoso JA and Redon J. Blood pressure and obesity exert independent influences on pulse wave velocity in youth. Hypertension. 2012;60:550-5	C	Cross-sectional study	Children and adolescents	Total, N=501; High normal BP, N=56; Hypertensive, N=21	Italian children (no race or alternative ethnicity indicated); 8 to 18 years of age	Unknown; not reported	N/A	N/A	PWV	Unknown	Progressive incremental increase in PWV values across BP groups. In contrast, obesity frequently linked to BP elevation blunted in part the progressive increment of PWV observed from normotensive to hypertensive subjects. The impact of BP condition for reflecting wave, as assessed by AI, was not different across the BP groups or for weight status	Knowledge of relationship between BP in youth and PWV	None reported	B>H	Population may not be representative of US population.
PICOT2	381	added	Zhu H, Yan W, Ge D, Treiber FA, Harshfield GA, Kapuku G, Snieder H and Dong Y	N/A	6.7	2008	Relationships of cardiovascular phenotypes with healthy weight, at risk of overweight, and overweight in US youths	Pediatrics	Zhu H, Yan W, Ge D, Treiber FA, Harshfield GA, Kapuku G, Snieder H and Dong Y. Relationships of cardiovascular phenotypes with healthy weight, at risk of overweight, and overweight in US youths. Pediatrics. 2008;121:115-22	C	Cross-sectional study	Children	N=972	Black and white children; mean age: 17.6 +/- 3.3 years	1-oscillometric, 2- ABPM	N/A	N/A	Pulse wave velocity, causal BP, ABPM, echoca	3- measurements	Higher than optimal weight is associated with higher than optimal BP and other markers of CVD	Knowledge of relationship between excess weight and BP	None reported	B>H	None reported.
PICOT2	382	added	Charakida M, Jones A, Falaschetti E, Khan T, Finer N, Sattar N, Hingorani A, Lawlor DA, Smith GD and Deanfield JE	N/A	6.7	2012	Childhood obesity and vascular phenotypes: a population study	J Am Coll Cardiol	Charakida M, Jones A, Falaschetti E, Khan T, Finer N, Sattar N, Hingorani A, Lawlor DA, Smith GD and Deanfield JE. Childhood obesity and vascular phenotypes: a population study. J Am Coll Cardiol. 2012;60:2643-50	C	Cross-sectional study	Children	N= 6592	All US children, 10 to 11 years of age	1- oscillometric	N/A	N/A	FMD, PWV	2- measurements	Overweight and obesity status does not have an impact on arterial function.
PICOT2	383	added	Doyon A, Kracht D, Bayazit AK, Deveci M, Duzova A, Krmar RT, Litwin M, Niemirska A, Oguz B, Schmidt BM, Sozeri B, Querfeld U, Melk A, Schaefer F, Wuhl E and Consortium CS	N/A	6.7	2013	Carotid artery intima-media thickness and distensibility in children and adolescents: reference values and role of body dimension	Hypertension	Doyon A, Kracht D, Bayazit AK, Deveci M, Duzova A, Krmar RT, Litwin M, Niemirska A, Oguz B, Schmidt BM, Sozeri B, Querfeld U, Melk A, Schaefer F, Wuhl E and Consortium CS. Carotid artery intima-media thickness and distensibility in children and adolescents: reference values and role of body dimensions. Hypertension. 2013;62:550-6	C	Cross-sectional study	Children and adolescents	N=1155	US Children; , 6 to 18 years of age	4- brachial	N/A	N/A	CIMT, brachial pulse	Unknown	Increase in CIMT with age, height, BMI and BP	Reference values for CIMT	None reported	B>H	Despite efforts to minimize interobserver variation by repeated intense joint training sessions, the use of several observers limited the precision and accuracy of data capture in this study. Subject number per age and sex group is also limited. The study is limited to cIMT and distensibility measures of the common carotid artery.
PICOT2	384	added	Urbina EM, Kimball TR, McCoy CE, Khoury PR, Daniels SR and Dolan LM	N/A	6.7	2009	Youth with obesity and obesity-related type 2 diabetes mellitus demonstrate abnormalities in carotid structure and function	Circulation	Urbina EM, Kimball TR, McCoy CE, Khoury PR, Daniels SR and Dolan LM. Youth with obesity and obesity-related type 2 diabetes mellitus demonstrate abnormalities in carotid structure and function. Circulation. 2009;119:2913-9	C	Cross-sectional study	Children, adolescents and young adults	N=446	Youth with Obesity and T2DM diabetes; 10-24 years of age	Unknown	N/A	N/A	cIMT, Young’s Elastic Modulus (YEM) and Beta Stiffness Index (β), anthropometric, laboratory, and BP	3- measuremeents	Adolescents and young adults with T2DM have significantly thicker cIMT than lean controls for the all carotid artery segments.	Knowledge of the relationship betweent diabetes and CIMT.	Higher CIMT in children with diabetes.	B>H	Cross-sectional design does not allow for determination of the the time sequence for development of vascular changes as an individual progresses from uncomplicated obesity to metabolic syndrome and finally type 2 diabetes.
PICOT2	385	added	Keehn L, Milne L, McNeill K, Chowienczyk P and Sinha MD	N/A	6.7	2014	Measurement of pulse wave velocity in children: comparison of volumetric and tonometric sensors, brachial-femoral and carotid-femoral pathways	J Hypertens	Keehn L, Milne L, McNeill K, Chowienczyk P and Sinha MD. Measurement of pulse wave velocity in children: comparison of volumetric and tonometric sensors, brachial-femoral and carotid-femoral pathways. J Hypertens. 2014;32:1464-9	C	Cross-sectional study	Children and adolescents	N=156	Majority with CKD; 3 to 18 years of age	Unknown	N/A	N/A	PWV computed over the carotid-femoral path (PWVcf) with that over the brachial-femoral path (PWVbf) using a volumetric system (Vicorder) (compared to) values of PWVcf obtained by the volumetric and a tonometric method (SphygmoCor) in children.	Unknown	Values obtained over the brachial-femoral path are closely correlated with those from the carotid-femoral path. However, Vicorder carotid-femoral values are only moderately correlated with those obtained from the SphygmoCor system	Vicorder technique is easy to use, is well tolerated by children and gives excellent repeatability. Values obtained over the brachial-femoral path are closely correlated with those from the carotid-femoral path	Measures of PWV are not interchangeable between SphyngmoCor device and Vicorder	B>H	Single population.
PICOT2	386	added	Kis E, Cseprekal O, Kerti A, Salvi P, Benetos A, Tisler A, Szabo A, Tulassay T and Reusz GS	N/A	6.7	2011	Measurement of pulse wave velocity in children and young adults: a comparative study using three different device	Hypertension Research - Clinical & Experimental	Kis E, Cseprekal O, Kerti A, Salvi P, Benetos A, Tisler A, Szabo A, Tulassay T and Reusz GS. Measurement of pulse wave velocity in children and young adults: a comparative study using three different devices. Hypertension Research - Clinical & Experimental. 2011;34:1197-202	C	Cross-sectional	Children, adolescent and adults	N=98	Children to adults, 6 to 27 years of age	N/A	N/A	N/A	PWV (comparison of different technologies)	N/A	Excellent concordance between all three devices: (Vicorder (VIC)); the gold standard of applanation tonometry (PulsePen (PP), Sphygmocor (SC))	Good concordance between different devices for measuring PWV	None	B>H	Small sample size.
PICOT2	387	162	Chhadia S, Cohn RA, Vural G, Donaldson JS	16	6.8	2013	Renal Doppler evaluation in the child with hypertension: a reasonable screening discriminator?	Pediatric radiology	Chhadia S, Cohn RA, Vural G, Donaldson JS. Renal Doppler evaluation in the child with hypertension: a reasonable screening discriminator? Pediatr Radiol. 2013 Dec;43(12):1549-56.	C,C	Retrospectiive cohort study	Children and adolescents	N= 62	1-18 years of age; Children who had a renal US with Doppler followed by a diagnostic arteriogram for the evaluation of hypertension during a 12-year period at a tertiary, single center	Unknown (BP obtained from the medical record)	N/A	angiography	sensitivity; specificity	Unknown	Doppler US 64% sesnsitive for RAS	Knowledge of sensititivity of renal ultrasound in detecting RAS in children.	Low sensitivity, specificty of this less invasive diagnostic tool.	B<H	Small sample size.
PICOT2	388	added	Castelli PK, Dillman JR, Kershaw DB, Khalatbari S, Stanley JC, Smith EA	16	6.8	2013	Renal sonography with doppler for detecting suspected pediatric renin-mediated hypertension - Is it adequate?	Pediatric radiology	Castelli PK, Dillman JR, Kershaw DB, Khalatbari S, Stanley JC, Smith EA. Renal sonography with Doppler for detecting suspected pediatric renin-mediated hypertension - is it adequate? Pediatr Radiol. 2014 Jan;44(1):42-9.	C	Retrospective cohort study	Children	N= 48	Children within a single center who underwent renal sonography for the evaluation of hypertension between January 1, 1995, and June 30, 2010 who also underwent pertinent confirmatory angiographic (CTA, MRA or intra-arterial digital subtraction arteriography) examinations (both images and reports)	N/A	N/A	N/A	sensitivity; specificity	N/A	Sensitivity (90%); specificity (68%); renal Doppler detects renin-mediated hypertension	High sensitivity	Low specificity	B>H	Small sample size (retrospective study).
PICOT2	389	105	Rountas C, Vlychou M, Vassiou K, Liakopoulos V, Kapsalaki E, Koukoulis G, Fezoulidis IV, Stefanidis I	16/17	6.8	2007	Imaging modalities for renal artery stenosis in suspected renovascular hypertension: prospective intraindividual comparison of color Doppler US, CT angiography, GD-enhanced MR angiography, and digital substraction angiography	Renal failure	Rountas C, Vlychou M, Vassiou K, Liakopoulos V, Kapsalaki E, Koukoulis G, Fezoulidis IV, Stefanidis I. Imaging modalities for renal artery stenosis in suspected renovascular hypertension: prospective intraindividual comparison of color Doppler US, CT angiography, GD-enhanced MR angiography, and digital substraction angiography. Ren Fail. 2007;29(3):295-302.	C,C	Prospective comparative study	Adolescents and adults	N= 129	Suspected renovascular HTN; 17-75 years of age	Ultrasound with Doppler, CTA, MRA	N/A	DSA (digital subtraction angiography)	Detection of renovascular stenoses	N/A	Sensitivity and specificity for detection of renal artery stenoses was 75% and 89% for ultrasound, 94% and 93% for CTA, and 90% and 94% for MRA.	CTA or MRA acceptable as non-invasive imaging for identification of stenoses	Contrast, radiation, claustrophobia	B>H (B<H depending on the situation)	The fact that DSA was accepted as a gold standard method with 100% sensitivity and specificity although this is not always supported by the literature.
PICOT2	391	43	Lagomarsino E, Orellana P, Muñoz J, Velásquez C, Cavagnaro F, Valdés F	16	6.8	2004	Captopril scintigraphy in the study of arterial hypertension in pediatrics	Pediatr Nephrol	Lagomarsino E, Orellana P, Muñoz J, Velásquez C, Cavagnaro F, Valdés F. Captopril scintigraphy in the study of arterial hypertension in pediatrics. Pediatr Nephrol. 2004 Jan;19(1):66-70.	C C/ AC	observational study	Children and adolescents	N=20	Children with a mean age 6.1+/-5.5 years	Captopril renal scintigraphy (CRS)	N/A	renal ultrasound scans	Detection of RVH	N/A	In 7 children, RVH was confirmed by angiography, and CRS was positive for RVH in 6 of these. CRS was negative for RVH in 12 of 13 children without RVH. CRS was non-diagnostic in 3 children with abnormal baseline renal scintigraphy and severely decreased relative renal function ( <35%), 1 of whom had RVH.	High sensitivity (TP: 6/7) and high specificity test (TN: 12/13) for renovascular hypertension	Invasice	B=H (depending on the sens/spec of other less invasive tests)	Small sample size.
PICOT2	392	145	Abdulsamea S, Anderson P, Biassoni L, Brennan E, McLaren CA, Marks SD, Roebuck DJ, Selim S, Tullus K	16	6.8	2010	Pre- and postcaptopril renal scintigraphy as a screening test for renovascular hypertension in children	Pediatric Nephrology	Abdulsamea S, Anderson P, Biassoni L, Brennan E, McLaren CA, Marks SD, Roebuck DJ, Selim S, Tullus K. Pre- and postcaptopril renal scintigraphy as a screening test for renovascular hypertension in children. Pediatr Nephrol. 2010 Feb;25(2):317-22.	C, D	Retrospective, observational	Children and adolescents	N= 83	Suspected renal artery stenosis; 1 to 18 years of age	None		Test characteristics	Presence of renal vascular disease		Pre and post captopril renal scintigraphy had low sensitivity and not useful (47% identified)	N/A	N/A
PICOT2	393	118	Günay EC, Oztürk MH, Ergün EL, Altun B, Salanci BV, Uğur O, Cil B, Hekimoğlu B, Caner B	16	6.8	2005	Losartan renography for the detection of renal artery stenosis: comparison with captopril renography and evaluation of dose and timing	Eur J Nucl Med Mol Imaging	Günay EC, Oztürk MH, Ergün EL, Altun B, Salanci BV, Uğur O, Cil B, Hekimoğlu B, Caner B. Losartan renography for the detection of renal artery stenosis: comparison with captopril renography and evaluation of dose and timing. Eur J Nucl Med Mol Imaging. 2005 Sep;32(9):1064-74.	C,C	Cross-sectional	Adults	N=32	Hypertensive adults	N/A		N/A	comparison of losartan vs. captopril renography in detection of renal arerty stenosis		losartan was not better than captopril	N/A	N/A	B=H	Small sample size.
PICOT2	395	added	Loeffler LF, Navas-Acien A, Brady TM, Miller ER 3rd, Fadrowski JJ	N/A	6.9	2012	Uric acid level and elevated blood pressure in US adolescents: National Health and Nutrition Examination Survey, 1999-2006	Hypertension	Loeffler LF, Navas-Acien A, Brady TM, Miller ER 3rd, Fadrowski JJ. Uric acid level and elevated blood pressure in US adolescents: National Health and Nutrition Examination Survey, 1999-2006. Hypertension. 2012 Apr;59(4):811-7	C	Cross-sectional study	Children and adolescents	N= 6036	Children, 12-17 year olds; participants in the National Health and Nutrition Examination Survey (NHANES); multiple races and both genders	4- manual BP with mercury sphyngomononmeter	N/A	N/A	BP	Yes- 3 measurements	The odds ratio of elevated blood pressure, defined as a systolic or diastolic blood pressure .95th percentile for age, sex and height, for each 0.1 mg/dL increase in uric acid level was 1.38 (95% confidence interval [CI], 1.16 to 1.65)	Knowledge of the relationship between uric acid levels and BP	No harm reported	B>H	Cross-sectional: not possible to establish that relatively higher uric acid levels preceded or caused elevated blood pressure. Elevated BP determined based on a single visit.
PICOT2	396	added	Shatat IF, Abdallah RT, Sas DJ, Hailpern SM	N/A	6.9	2012	Serum uric acid in U.S. adolescents: distribution and relationship to demographic characteristics and cardiovascular risk factors	Pediatr Res	Shatat IF, Abdallah RT, Sas DJ, Hailpern SM. Serum uric acid in U.S. adolescents: distribution and relationship to demographic characteristics and cardiovascular risk factors. Pediatr Res. 2012 Jul;72(1):95-100	C	Cross-sectional study	Adolescents	N= 1912	Adolescent participants in NHANES: NHANES 2005–2008, 13–18 y of age and representing 19,888,299 adolescents	Unknown	N/A	N/A	uric acid level	Unknown	Mean UA level was 5.14 ± 1.45 mg/dl.	Knowledge of mean uric acid levels in adolescents	No harm reported	B>H	Cross-sectional study.
PICOT2	397	added	Viazzi F, Antolini L, Giussani M, Brambilla P, Galbiati S, Mastriani S, Stella A, Pontremoli R, Valsecchi MG, Genovesi S	N/A	6.9	2013	Serum uric acid and blood pressure in children at cardiovascular risk	Pediatrics	Viazzi F, Antolini L, Giussani M, Brambilla P, Galbiati S, Mastriani S, Stella A, Pontremoli R, Valsecchi MG, Genovesi S. Serum uric acid and blood pressure in children at cardiovascular risk. Pediatrics. 2013 Jul;132(1):e93-9	C	Cross-sectional study	Children and adolescents	N= 501	Children 6 to 18 years of age; Italian youth	4- aneroid sphyngomanometer	N/A	N/A	BP	Yes- 3 measurements	Serum uric acid levels are associated with elevated BP	Knowledge of the relationship between uric acid levels and BP	No harm reported	B>H	Cross-sectional study.
PICOT2	398	added	Reschke LD, Miller ER 3rd, Fadrowski JJ, Loeffler LF, Holmes KW, Appel LJ, Brady TM	N/A	6.9	2015	Elevated uric acid and obesity-related cardiovascular disease risk factors among hypertensive youth	Pediatr Nephrol	Reschke LD, Miller ER 3rd, Fadrowski JJ, Loeffler LF, Holmes KW, Appel LJ, Brady TM. Elevated uric acid and obesity-related cardiovascular disease risk factors among hypertensive youth. Pediatr Nephrol. 2015 Dec;30(12):2169-76	B	Prospective cohort study	Children, adolescents and young adults	N= 53	Children 3-19 years of age	4- aneroid sphyngomanometer; 2	N/A	N/A	BP	Yes- at least 3 measurements in addition to ABPM	Hypertensive children with elevated UA have a higher prevalence of obesity related CVD risk factors. Among hypertensive children, UA may be a marker of adiposity and not an independent CVD risk factor	Knowledge of relationship between UA levels and CVD. However, UA levels were also higher in obesity groups.	UA levels higher in obese persons. Increased body mass is associated with LVH (thus unclear if UA is causal or associated with another risk factor)	B>H	Cross-sectional study.
PICOT2	399	added	Alper AB Jr, Chen W, Yau L, Srinivasan SR, Berenson GS, Hamm LL	N/A	6.9	2005	hildhood uric acid predicts adult blood pressure: the Bogalusa Heart Study	Hypertension	Alper AB Jr, Chen W, Yau L, Srinivasan SR, Berenson GS, Hamm LL. Childhood uric acid predicts adult blood pressure: the Bogalusa Heart Study. Hypertension. 2005 Jan;45(1):34-8	C	Cross-sectional study	Children, adolescents and young adults	N= 577	Children, 5 to 17 years; Bogalusa Heart Study; Young adults 18 to 35 years of age	4- mercury sphyngomonometer	N/A	N/A	BP	Yes- at least 6 measurements	In a multivariate regression analysis, adjusting for age, sex, race, childhood body mass index, childhood uric acid levels, and change in levels of uric acid were significant predictors of adult diastolic blood pressure, whereas change in uric acid was a significant predictor of adult systolic blood pressure	Knowledge of relationship between uric acid and BP	No harm reported	B>H	None.
PICOT2/PICOT4	400	174	Soletsky B, Feig DI	N/A	6.9	2012	Uric acid reduction rectifies prehypertension in obese adolescents	Hypertension	Soletsky B, Feig DI. Uric acid reduction rectifies prehypertension in obese adolescents. Hypertension. 2012 Nov;60(5):1148-56	A	Randomized, double-blinded, placebo-controlled trial	Children	N= 120	Children, 11-17 years of age	4- aneroid sphyngomonometer	xanthine oxidase inhibitor, allopurinol, uricosuric, probenecid, or placebo	Placebo	BP	Yes- 4 measurements	Subjects treated with urate-lowering therapy experienced a highly significant reduction in BP. In clinic systolic BP fell 10.2 mm Hg and diastolic BP fell 9.0 mm Hg in treated patients compared with a rise of 1.7 mm Hg and 1.6 mm Hg systolic and diastolic BP, respectively in patients on placebo	Improvement in BP with lowering of UA levels	No reported sided effects	B>H	Small sample size.
PICOT3	401	230	Feig DI, Soletsky B, Johnson RJ	N/A	6.9	2008	Effect of allopurinol on blood pressure of adolescents with newly diagnosed essential hypertension: a randomized trial	JAMA	Feig DI, Soletsky B, Johnson RJ. Effect of allopurinol on blood pressure of adolescents with newly diagnosed essential hypertension: a randomized trial. JAMA. 2008 Aug 27;300(8):924-32.	A	Randomized, double-blind, placebo-controlled, crossover trial	Adolescents	N= 300	Single center;Adolescents with never-treated stage 1 essential hypertension and serum uric acid levels .6 mg/dL.	4- aneroid device	Allopurinol, 200 mg twice daily for 4 weeks, and placebo, twice daily for 4 weeks, with a 2-week washout period between treatments	Placebo	BP	Yes- 4 measurements	Treatment with allopurinol resulted in reduction of BP	Knowledge of potential benefit of lowering UA levels on BP	Adverse effects of allopurinol	B>H	Small sample size, majority obese children and short duration of therapy.
PICOT3	402	65	Assadi F	N/A	6.9	2014	Allopurinol enhances the blood pressure lowering effect of enalapril in children with hyperuricemic essential hypertension	Journal of Nephrology	Assadi F. Allopurinol enhances the blood pressure lowering effect of enalapril in children with hyperuricemic essential hypertension. J Nephrol. 2014 Feb;27(1):51-6	A	Randomized trial	Children	N=44	Children, 12-19 years of age diagnosed with essential hypertension and with baseline uric acid levels > 5.5mg/dL	4- calibrated aneroid manometer	enalapril + allopurinol	enalapril alone	SBP, DBP (change from baseline) after 8 weeks of treatment	Yes- 3 measurements	Enalapril alone: mean change in SBP -4.3mmg (-2.1 to -6.7mmHg) versus. Enalapril +allopurinol treatment group -8.2mmHg (-7.2 to -9.8mmHg)	Knowledge of the potential anti-hypertensive treatment benefits of allopurinol in children with hyperuricemia	Short duration of treatment	B>H	Open label trial (potential overestimate of the treatment effect).
PICOT3	403	392	Feig DI, Nakagawa T, Karumanchi SA, Oliver WJ, Kang DH, Finch J, Johnson RJ	N/A	6.9	2004	Hypothesis: Uric acid, nephron number, and the pathogenesis of essential hypertension	Kidney International	Feig DI, Nakagawa T, Karumanchi SA, Oliver WJ, Kang DH, Finch J, Johnson RJ. Hypothesis: Uric acid, nephron number, and the pathogenesis of essential hypertension. Kidney Int. 2004 Jul;66(1):281-7	C	Proof of principal study; Restrospective study and open label crossover study	Children	N= 95	children with new onset primary hypertension	Unknown	Allopurinol	placebo (for cross-over study); also washout period (discontinuation of allopurionol treatment)	change in uric acid and BP	Unknown	BP reduction associated with decrease in uric acid (via use of allopurinol).	Knowledge of the potential role of uric acid on BP	Proposed that elevated uric acid levels results in reduced nephron number	B>H	Limited sample size.
PICOT2	404	added	Viazzi F, Rebora P, Giussani M, Orlando A, Stella A, Antolini L, Valsecchi MG, Pontremoli R, Genovesi S	N/A	6.9	2016	Increased Serum Uric Acid Levels Blunt the Antihypertensive Efficacy of Lifestyle Modifications in Children at Cardiovascular Risk	Hypertension	Viazzi F, Rebora P, Giussani M, Orlando A, Stella A, Antolini L, Valsecchi MG, Pontremoli R, Genovesi S. Increased Serum Uric Acid Levels Blunt the Antihypertensive Efficacy of Lifestyle Modifications in Children at Cardiovascular Risk. Hypertension. 2016 May;67(5):934-40	B	Cross-sectional study	Children	N= 248	Children referred to the Unit for Cardiovascular Risk Assessment for elevated BP, dyslipidemia or a positive family history of cardiovascular diseaese; Italian children,	Unknown	N/A	N/A	BP	Yes- 3 measurements (and on at least 2 separate occasions)	Systolic blood pressure z-score (P<0.0001), uric acid value (P=0.0056), and puberty at baseline (P=0.0048) were independently associated with higher systolic blood pressure z-score at follow-up, whereas a negative association was observed with body mass index z-score decrease during follow-up (P=0.0033). The risk of hypertension at followup was associated with body mass index (P=0.0025) and systo…	Knowledge of the association between uric acid levels and BP	No harm reported	B>H	Single center study.
PICOT2	405	added	Klausen K, Borch-Johnsen K, Feldt-Rasmussen B, Jensen G, Clausen P, Scharling H, Appleyard M, Jensen JS	18	6.10	2004	Very low levels of microalbuminuria are associated with increased risk of coronary heart disease and death independently of renal function, hypertension, and diabetes	Circulation	Klausen K, Borch-Johnsen K, Feldt-Rasmussen B, Jensen G, Clausen P, Scharling H, Appleyard M, Jensen JS. Very low levels of microalbuminuria are associated with increased risk of coronary heart disease and death independently of renal function, hypertension, and diabetes. Circulation. 2004 Jul 6;110(1):32-5	C	Prospective cohort study until 1999 (5 to 7 years follow-up)	Adults	N= 2762	Members of the Third Copenhagen City Heart Study in 1992-1994; 30 to 70 year olds	4- sphyngomonometer	N/A	N/A	BP	No- single measurement	Urinary albumin excretion above the upper quartile, ie, 4.8 g/min, was associated with increased risk of coronary heart disease (RR, 2.0; 95% CI, 1.4 to 3.0; P 0.001) and death (RR, 1.9; 95% CI, 1.5 to 2.4; P 0.001) independently of age, sex, renal creatinine clearance, diabetes mellitus, hypertension, and plasma lipids. Lower levels of urinary albumin excretion were not associated with increased…	Knowledge of the relationship between microalbumin levels and cardiovascular disease risk	Higher urinary albumin levels assoicatd with increased risk of cardiovascular disease	B<H	Adults only.
PICOT2	406	added	Bigazzi R, Bianchi S, Baldari D, Campese VM	18	6.10	1998	Microalbuminuria predicts cardiovascular events and renal insufficiency in patients with essential hypertension	J Hypertens	Bigazzi R, Bianchi S, Baldari D, Campese VM. Microalbuminuria predicts cardiovascular events and renal insufficiency in patients with essential hypertension. J Hypertens. 1998 Sep;16(9):1325-33	C	Retrospective cohort study	Adults	N =141	Italian adults	Unknown	N/A	Persons with normal urinary excretion of albumin	BP	Yes- at least 3 measurements (over 3 visits)	Stepwise logistic regression analysis showed that urinary excreted albumin (UAE) (P = 0.003), cholesterol level (P = 0.047) and diastolic blood pressure (P = 0.03) were independent predictors of the cardiovascular outcome. Rate of clearance of creatinine from patients with microalbuminuria decreased more than did that from those with normal UAE (decrease of 12.1 ± 2.77 versus 7.1 ± 0.88 ml/min, P…	Knowledge of the relationship between microalbumin levels and cardiovascular disease risk	Hypertensive individuals with microalbuminuria manifest a greater incidence of cardiovascular events and a greater decline in renal function than do patients with normal UAE	B>H	Adults only.
PICOT2	409	added	Radhakishun NN, van Vliet M, von Rosenstiel IA, Beijnen JH, Diamant M	18	6.10	2013	Limited value of routine microalbuminuria assessment in multi-ethnic obese children	Pediatr Nephrol	Radhakishun NN, van Vliet M, von Rosenstiel IA, Beijnen JH, Diamant M. Limited value of routine microalbuminuria assessment in multi-ethnic obese children. Pediatr Nephrol. 2013 Jul;28(7):1145-9	C	Retrospective analysis of prospectively acquired data	Children	N= 308	Multi ethnic, overweight and obese children	Unknown	N/A	N/A	Microalbuminuria	N/A	Albumin/creatinine ratio (ACR) was not associated with hypertension, impaired glucose tolerance, high triglycerides or low high-density lipoprotein-cholesterol.	Knowledge of the relationship between albumin/creatinine ratio.	No harm	B>H	Cross-sectional design; lack of normal-weight control group; presense of postural proteinuria.
PICOT2	411	added	Seeman T, Pohl M, Palyzova D, John U	18	6.10	2012	Microalbuminuria in children with primary and white-coat hypertension	Pediatr Nephrol	Seeman T, Pohl M, Palyzova D, John U. Microalbuminuria in children with primary and white-coat hypertension. Pediatr Nephrol. 2012 Mar;27(3):461-7	C	Retrospective cohort study	Children and adolescents	N= 52	Children and adolescents with hypertension	2- ABPM, 4- office measurement (unknown method)	N/A	N/A	Urinary albumin excretion	Yes- 3 measurements	Microalbuminuria (>3.2 mg/mmol creatinine) was present in 20% of children with PH and none of the children with WCH (p<0.01). Children with PH had a higher median UAE than those with WCH (1.27±1.92 vs. 0.66±0.46 mg/ mmol creatinine, p<0.05	Recognition of the relationship between primary hypertension (versus white coat hypertension) and microalbuminuia	None	B>H	Small sample size.
PICOT2	412	added	Sanad M, Gharib A	18	6.10	2011	Evaluation of microalbuminuria in obese children and its relation to metabolic syndrome	Pediatr Nephrol	Sanad M, Gharib A. Evaluation of microalbuminuria in obese children and its relation to metabolic syndrome. Pediatr Nephrol. 2011 Dec;26(12):2193-9	C	Cross-sectional study	Children	N=140	Egyptian children; obese children selected from those attending the Pediatric Department and Outpatient Clinic of Zagazig University Hospital	Unknown	N/A	N/A	Microalbuminuria, BMI, waist circumference, systolic and diastolic blood pressure, triglyceride level, LDL level, insulin resistance and fasting glucose level	Unknown	Significant positive correlations between microalbuminuria and BMI, waist circumference, systolic and diastolic blood pressure, triglyceride level, LDL level, insulin resistance and fasting glucose level, respectively. In contrast, there was significant negative correlation between microalbuminuria and HDL level (P<0.01). There were no significant correlations between microalbuminuria and age in …	Relationship between microalbuminuria and other risk factors for premature cardiovascular disease	No harm	B>H	Use of a single urine sample to estimate microalbuminuria.
PICOT3/PICOT4	413	240/19	Assadi F	18	6.10	2007	Effect of microalbuminuria lowering on regression of left ventricular hypertrophy in children and adolescents with essential hypertension	Pediatric Cardiology	Assadi F. Effect of microalbuminuria lowering on regression of left ventricular hypertrophy in children and adolescents with essential hypertension. Pediatr Cardiol. 2007 Jan-Feb;28(1):27-33.	B	Prospective, nonrandomized, controlled trial, 2003-2005	Children	N= 174		4- aneroid device	N/A	N/A	Microalbuminuria, LVH	Yes- at least 3 measurements	Microalbuminuria (MA) is a strong predictor of LVH in hypertensive children and adolescents. MA lowering halts the progression of LVH or induces its regression.	Knowledge of the relationship between MA and LVH	MA is a strong predictor of LVH	B<H	None reported.
PICOT4	414	132	Niemirska A, Litwin M, Feber J, Jurkiewicz E	19	7.1	2013	Blood pressure rhythmicity and visceral fat in children with hypertension	Hypertension	Niemirska A, Litwin M, Feber J, Jurkiewicz E. Blood pressure rhythmicity and visceral fat in children with hypertension. Hypertension. 2013 Oct;62(4):782-8.	C	Cohort	Adolescent boys	N=50	Primary hypertension	2	pharmacologic and non-pharmacologic treatment	N/A	BP, body fat content, ABPM parameters	N/A- ABPM	blood pressure lowering with weight loss reduced BP and other CV parameters	improved CV risk factors	None reported	B>H	Small sample size.
PICOT4	415	113	Kupferman JC, Paterno K, Mahgerefteh J, Pagala M, Golden M, Lytrivi ID, Ramaswamy P	19, 23	7.1, 8.1a	2010	Improvement of left ventricular mass with antihypertensive therapy in children with hypertension	Pediatric Nephrology	Kupferman JC, Paterno K, Mahgerefteh J, Pagala M, Golden M, Lytrivi ID, Ramaswamy P. Improvement of left ventricular mass with antihypertensive therapy in children with hypertension. Pediatr Nephrol. 2010 Aug;25(8):1513-8.	C/C	Retrospective cohort study	Children	N= 42	Hypertensive children undergoing at least 2 echocardiograms. Single center study.	2- ABPM	Enalapril treatment for hypertension	None	Change in LVM by group (LVH present or not)	N/A- ABPM	LVM decreased significantly in the group with LVH; correlated with change in BP; BMI did not change	Evidence to support reversal of LVH with adequate blood pressure control.	NA	B>H	Retrospective nature. The study groups were heterogeneous, being on different treatment protocols. Two patients with LVH were not recognized as such at the initial visit and remained untreated.
PICOT3	416	added	Falkner B, DeLoach S, Keith SW, Gidding SS	18	6.10	2013	High risk blood pressure and obesity increase the risk for left ventricular hypertrophy in African-American adolescents	J Pediatr	Falkner B, DeLoach S, Keith SW, Gidding SS. High risk blood pressure and obesity increase the risk for left ventricular hypertrophy in African-American adolescents. J Pediatr. 2013;162:94–100	C	Observational study	Children	N=301	African American Children only, non-obese and obese; 13- 18 years of age	1- oscillometric	N/A	N/A	Echocardiogram measurements, urine albumin excretion	6- measurements (3 obtained on 2 separate days); additional 3 measurements (additional day), if BP elevated on prior 2 days	Prevalence of LVH is highest among AA adolescents with average BP ≥120/80 mm Hg and obesity. There also is an independent association of LVMI with BP, beginning at the 75th systolic BP percentile	Knowlegde of risk factors for LVH	LVH highest among African Americas with average BP > 120/80	B>H	Oscillometric BP.
PICOT3	417	added	Stabouli S, Kotsis V, Rizos Z, Toumanidis S, Karagianni C, Constantopoulos A, Zakopoulos N	18	6.10	2009	Left ventricular mass in normotensive, prehypertensive and hypertensive children and adolescents	Pediatr Nephrol	Stabouli S, Kotsis V, Rizos Z, Toumanidis S, Karagianni C, Constantopoulos A, Zakopoulos N. Left ventricular mass in normotensive, prehypertensive and hypertensive children and adolescents. Pediatr Nephrol. 2009 Aug;24(8):1545-51	C	Observational study	Children and adolescents	N=124	All Caucasian. No racial or ethnic minorities. Consecutive children and adolescents who were referred to our hypertension center for evaluation of suspected hypertension from their primary health care providers (normotensive, pre-hypertensive and hypertensive)	2-ABPM, 4-mercury sphyngomanometer	N/A	N/A	Clinic blood pressure measurements, Ambulatory blood pressure monitoring, Echocardiography	4- measurements	The prevalence of LVH was significantly higher in the prehypertensive compared to normotensive subjects, and was equal to that of the hypertensive subjects. Hypertension and prehypertension in children and adolescents were associated with pathologically levated LVMI values	N/A	N/A	N/A	Non-US population. Study population may not be reflective of US population.
PICOT3	418	added	Tirosh A, Afek A, Rudich A, Percik R, Gordon B, Ayalon N, Derazne E, Tzur D, Gershnabel D, Grossman E, Karasik A, Shamiss A, Shai I	19	8.1, 8.5, 7.1	2010	Progression of normotensive adolescents to hypertensive adults: a study of 26,980 teenagers	Hypertension	Tirosh A, Afek A, Rudich A, Percik R, Gordon B, Ayalon N, Derazne E, Tzur D, Gershnabel D, Grossman E, Karasik A, Shamiss A, Shai I. Progression of normotensive adolescents to hypertensive adults: a study of 26,980 teenagers. Hypertension. 2010 Aug;56(2):203-9.	B	Cross-sectional study	Adults	N= 26,980	Israeli soldiers. ; Participants in the Metabolic Lifestyle and Nutritition Assessment in Young Adults (MELANY), Israel Defense Forces Staff	Unknown (see original studies)	N/A	N/A	BP	Not reported, but at least 3	Mean BP values are higher among male adolescents than among female adolescents despite lower mean BMI. The incidence rate of hypertension during early adulthood is 2- to 3-fold higher among men in all of the categories of BP 140/90 mm Hg. Second, ncreasing age 17 BP within the current definitions of normal BP and prehypertension is linearly associated with higher risk of hypertension	Knowledge of BP at adolescence, even in the low-normotensive range, linearly predicts progression to hypertension in young adulthood		B>H	Age 17 determinations of BP are a single-visit measurement, and although performed after rest, could generally be viewed as being performed in a more stressful setting than usual. This may explain the rather high prevalence of prehypertension (BP 120/80 mm Hg).
PICOT4	420	128	Moreno-Luna R, Muñoz-Hernandez R, Miranda ML, Costa AF, Jimenez-Jimenez L, Vallejo-Vaz AJ, Muriana FJ, Villar J, Stiefel P	N/A	7.2	2012	Olive oil polyphenols decrease blood pressure and improve endothelial function in young women with mild hypertension	American journal of hypertension	Moreno-Luna R, Muñoz-Hernandez R, Miranda ML, Costa AF, Jimenez-Jimenez L, Vallejo-Vaz AJ, Muriana FJ, Villar J, Stiefel P. Olive oil polyphenols decrease blood pressure and improve endothelial function in young women with mild hypertension. Am J Hypertens. 2012 Dec;25(12):1299-304.	B	RCT	Adult	N= 24	young women 24-27 y/o with primary hypertension	1	dietary enrichment with polyphenol-rich olive oil	usual diet	BP, inflammatory markers	Yes- 3 measurements	enriched diet led to reduction in SBP, DBP, CRP and other inflammatory markers	improved CV risk factors	None reported	B>H	Small sample size. Adults.
PICOT3	421	565	Damasceno MM, de Araújo MF, de Freitas RW, de Almeida PC, Zanetti ML	20	7.2a	2011	The association between blood pressure in adolescents and the consumption of fruits, vegetables and fruit juice--an exploratory study	Journal of Clinical Nursing	Damasceno MM, de Araújo MF, de Freitas RW, de Almeida PC, Zanetti ML. The association between blood pressure in adolescents and the consumption of fruits, vegetables and fruit juice--an exploratory study. J Clin Nurs. 2011 Jun;20(11-12):1553-60	C	Cross-sectional study	Adolescents	N= 794	Brazilain adolescents 12-17 years	4- Aneroid sphyngomanometer	N/A	N/A	BP (categorized by quantity of fruit, vegetable and fruit juice intake)	Yes- 3 measurements	1. Lower BP levels were found among youth who consumed more fruit juice	Change in BP however, was minimal (~2mmHg)	None reported	B>H	Non-US population.
PICOT2	422	added	Juonala M, Viikari JS, Kähönen M, Taittonen L, Laitinen T, Hutri-Kähönen N, Lehtimäki T, Jula A, Pietikäinen M, Jokinen E, Telama R, Räsänen L, Mikkilä V, Helenius H, Kivimäki M, Raitakari OT	20	7.2	2010	Life-time risk factors and progression of carotid atherosclerosis in young adults: the Cardiovascular Risk in Young Finns study	Eur Heart J	Juonala M, Viikari JS, Kähönen M, Taittonen L, Laitinen T, Hutri-Kähönen N, Lehtimäki T, Jula A, Pietikäinen M, Jokinen E, Telama R, Räsänen L, Mikkilä V, Helenius H, Kivimäki M, Raitakari OT. Life-time risk factors and progression of carotid atherosclerosis in young adults: the Cardiovascular Risk in Young Finns study. Eur Heart J. 2010 Jul;31(14):1745-51	C	Cross-sectional study	Children and adolescents	N= 1809	Cardiovascular risk in young Finns cohort	4- ultrasound device or mercury sphyngomanometer	N/A	N/A	carotid intima media thickness (CIMT)	Yes- 3 measurements	Childhood risk factors: high LDL-cholesterol, low HDL-cholesterol, high blood pressure, obesity, diabetes, smoking, low physical activity, infrequent fruit consumption were associated with a 6-year change in adulthood IMT. In subjects with 0, 1, 2, and ≥3 childhood risk factors, IMT [mean (95% CI)) increased by 35 (28–42), 46 (40–52), 49 (41–57), and 61 (49–73) mm (P > 0.0001), respectively.	Knowledge of the impact of CVD risk factors on CIMT (marker of atherosclerotic disease)	No harms reported	B>H	Finnish study. Not racially and etnically diverse.
PICOT2/PICOT4	423	217	Yuan WL, Kakinami L, Gray-Donald K, Czernichow S, Lambert M, Paradis G	20	7.2, 13.2	2013	Influence of dairy product consumption on children's blood pressure: results from the QUALITY cohort	J Acad Nutr Diet	Yuan WL, Kakinami L, Gray-Donald K, Czernichow S, Lambert M, Paradis G. Influence of dairy product consumption on children's blood pressure: results from the QUALITY cohort. J Acad Nutr Diet. 2013 Jul;113(7):936-41	B	Prospective cohort study	Children	N= 6108	Canadian children participating in the QuÊbec Adipose and Lifestyle Investigation among Youth (QUALITY)	1- oscillometric	N/A	N/A	BP	Yes- 5 measurements	1. Children were classified into low (0 to 1), medium (1.1 to 1.9), and high ( 2) tertiles of dairy intake servings per day. The prevalence of overweight was the lowest in the highest dairy consumption tertile (P 0.05); 2. high dairy intake ( 2 servings of dairy per day) was associated with 1.74 mm Hg lower systolic blood pressure (P 0.05) and with 0.87 mm Hg lower diastolic blood pressure (P0.10…	Knowledge of the positive impact of dairy intake on BP	No harms reported	B>H	Canadian study.
PICOT2	424	added	Moore LL, Bradlee ML, Singer MR, Qureshi MM, Buendia JR, Daniels SR	20	7.2a	2012	Dietary Approaches to Stop Hypertension (DASH) eating pattern and risk of elevated blood pressure in adolescent girls	Br J Nutr	Moore LL, Bradlee ML, Singer MR, Qureshi MM, Buendia JR, Daniels SR. Dietary Approaches to Stop Hypertension (DASH) eating pattern and risk of elevated blood pressure in adolescent girls. Br J Nutr. 2012 Nov 14;108(9):1678-85	C	Prospective cohort study	Young adults, 18-20 years of age	N= 2185	NHLBI growth and health study	Uknown	N/A	N/A	BP	Yes- 3 measurements	1. Girls who consumed >2 daily servings of dairy and >3 servings of fruits and vegetables (FV) had a 36 % lower risk (95 % CI: 0·43, 0·97) of elevated BP (EBP) in late adolescence	Knowledge of the potential impact of the DASH diet on blood pressure	No harms reported	B>H	Non-US study.
PICOT2	425	added	Günther AL, Liese AD, Bell RA, Dabelea D, Lawrence JM, Rodriguez BL, Standiford DA, Mayer-Davis EJ	20, 26	7.2a, 8.2	2009	Association between the dietary approaches to hypertension diet and hypertension in youth with diabetes mellitus	Hypertension	Günther AL, Liese AD, Bell RA, Dabelea D, Lawrence JM, Rodriguez BL, Standiford DA, Mayer-Davis EJ. Association between the dietary approaches to hypertension diet and hypertension in youth with diabetes mellitus. Hypertension. 2009 Jan;53(1):6-12	C	Cross-sectional study	Young adults < 20 years of age	N= 2830	SEARCH for Diabetes in Youth, adolescents and young adults < 20 years of age	4- mercury sphyngomanometer	N/A	N/A	BP	Yes- 3 measurements	1. The crude prevalence of hypertension was 6.8% for youth with type 1 and 28.2% for youth with type 2 diabetes mellitus. In youth with type 1, a higher adherence to DASH was inversely related to hypertension, independent of demographic, clinical, and behavioral characteristics	Knowledge of the potential impact of the DASH diet on blood pressure in persons with diabetes		B>H	Study design.
PICOT4	426	590	Couch SC, Saelens BE, Levin L, Dart K, Falciglia G, Daniels SR	20	7.2a	2008	The efficacy of a clinic-based behavioral nutrition intervention emphasizing a DASH-type diet for adolescents with elevated blood pressure	J Pediatr	Couch SC, Saelens BE, Levin L, Dart K, Falciglia G, Daniels SR. The efficacy of a clinic-based behavioral nutrition intervention emphasizing a DASH-type diet for adolescents with elevated blood pressure. J Pediatr. 2008 Apr;152(4):494-501	A	RCT	Children and adolescents	N=57	Adolescents with a diagnosis of pre-hypertension	4- mercury sphyngomanometer	DASH diet (but taylored for adolescent needs)	Routine dietary interveniton	BP	Yes- 4 measurements	DASH versus RC had a greater decrease in SBP z scores from baseline to post-treatment. (P < 0.01) and a trend for a greater decrease in SBP z scores from baseline through follow-up (P .07). DBP z scores changed similarly for conditions from baseline through follow-up. Relative to RC, DASH had a greater increase in intake of fruits (P < .001), potassium and magnesium (P < .01), and a greater decre…	Knowledge of the potential impact of the DASH diet on blood pressure		B>H	Limited sample size.
PICOT2/ PICOT4	427	70	Davis JN, Ventura EE, Cook LT, Gyllenhammer LE, Gatto NM	20	7.2a, 13.2	2011	LA Sprouts: a gardening, nutrition, and cooking intervention for Latino youth improves diet and reduces obesity	J Am Diet Assoc	Davis JN, Ventura EE, Cook LT, Gyllenhammer LE, Gatto NM. LA Sprouts: a gardening, nutrition, and cooking intervention for Latino youth improves diet and reduces obesity. J Am Diet Assoc. 2011 Aug;111(8):1224-30	A	Case-control study	Chidren	N= 104 (controls), N= 61 cases	Latino youth	Unknown	Participation in LA Sprouts	Normal weight group	BP and dietary changes	Unknown	Compared to subjects in the control group, LA Sprouts participants had increased dietary fiber intake (22% vs 12%; P0.04) and decreased diastolic blood pressure ( 5% vs 3%; P0.04). For the overweight subsample, LA Sprouts participants had a significant change in dietary fiber intake (0% vs 29%; P0.01), reduction in body mass index ( 1% vs 1%; P0.04) and less weight gain (1% vs 4%; P0.03) compared…	Knowledge of Sprout program on dietary intake of fiber and also on BP		B>H	Latino only population.
PICOT3	428	292	Saneei P, Hashemipour M, Kelishadi R, Rajaei S, Esmaillzadeh	20	7.2a	2013	Effects of recommendations to follow the Dietary Approaches to Stop Hypertension (DASH) diet v. usual dietary advice on childhood metabolic syndrome: a randomised cross-over clinical trial	Br J Nutr	Saneei P, Hashemipour M, Kelishadi R, Rajaei S, Esmaillzadeh A. Effects of recommendations to follow the Dietary Approaches to Stop Hypertension (DASH) diet v. usual dietary advice on childhood metabolic syndrome: a randomised cross-over clinical trial. Br J Nutr. 2013 Dec;110(12):2250-9	B	Cross-over randomised clinical trial	Adolescents	N =60	Female post-pubescent adolescent girls aged 11–18 years with the MetS participated in the present study	1- digital sphygmomanometer	DASH diet	Usual dietary advice	BP	No- 2 measurements	In the present randomised cross-over clinical trial, we found that recommendations to follow the DASH diet among children, compared with UDA, resulted in improved diet quality and reduced the prevalence of the MetS and high blood pressure	Benefit of the DASH diet on blood pressure		B>H
PICOT3	429	150	Barnes TL, Crandell JL, Bell RA, Mayer-Davis EJ, Dabelea D, Liese AD	20	7.2a, Table 14	2013	Change in DASH diet score and cardiovascular risk factors in youth with type 1 and type 2 diabetes mellitus: The SEARCH for Diabetes in Youth Study	Nutr Diabetes	Barnes TL, Crandell JL, Bell RA, Mayer-Davis EJ, Dabelea D, Liese AD. Change in DASH diet score and cardiovascular risk factors in youth with type 1 and type 2 diabetes mellitus: The SEARCH for Diabetes in Youth Study. Nutr Diabetes. 2013 Oct 14;3:e91	C/B	Prospective cohort study	Children, adolescents and young adults	N= 797	Participants of the SEARCH study (multicenter study of physician-diagnosed diabetes). Youth with Type 1 and Type 2 diabetes mellitus	Unknown	DASH diet	N/A	whether changes in diet quality as characterized by DASH are associated with changes in CVD risk factors in youth with diabetes over time	Unknown	DASH-related adherence was poor and changed very little over time. However, an increase in DASH diet score was significantly associated with a decrease in HbA1c levels in youth with type 1 diabetes (b ¼ 0.20, P-value ¼ 0.0063) and a decrease in systolic blood pressure among youth with type 2 diabetes (b ¼ 2.02, P-value ¼ 0.0406). Improvements in dietary quality may be beneficial in youth with typ…	Not indicated	N/A	B>H	Limited sample size.
PICOT2	431	added	Monzavi R, Dreimane D, Geffner ME, Braun S, Conrad B, Klier M, Kaufman FR	N/A	7.2b, 7.2c	2006	Improvement in risk factors for metabolic syndrome and insulin resistance in overweight youth who are treated with lifestyle intervention	Pediatrics	Monzavi R, Dreimane D, Geffner ME, Braun S, Conrad B, Klier M, Kaufman FR. Improvement in risk factors for metabolic syndrome and insulin resistance in overweight youth who are treated with lifestyle intervention. Pediatrics. 2006 Jun;117(6):e1111-8	B	Prospective cohort, Intervention study	Children and adolescents	N= 59	Children, 8-16 years of age; single center	Unknown	12-week family lifestyle intervention program	N/A	Metabolic syndrome: basec upon NCEP criteria (BMI > 95th percentile, SBP or DBP > 95th percentile, TG >90th, age related HDL < 10th; diagnosis of insulin resistance based upon abnormal QUICKI, HOMA or IR.	Unknown	Overweight youth have multiple risk factors associated with the metabolic syndrome. A 12-week lifestyle program may have a positive effect on reducing risk factors for the metabolic syndrome and insulin resistance in overweight youth; At baseline, 49.5% of youth had multiple risk factors associated with the metabolic syndrome, based on a modified definition of the National Cholesterol Education P…	Knowledge of the prevalence of metabolic syndrome in overweight youth	No harm reported	B>H	Low atrtrition rate (46%). High dropout rate (only 43/59 completed the program), implying that only more successful persons completed the program.
PICOT2	432	added	Asghari G, Yuzbashian E, Mirmiran P, Hooshmand F, Najafi R, Azizi F	N/A	7.2c	2016	Dietary Approaches to Stop Hypertension (DASH) Dietary Pattern Is Associated with Reduced Incidence of Metabolic Syndrome in Children and Adolescents	J Pediatr	Asghari G, Yuzbashian E, Mirmiran P, Hooshmand F, Najafi R, Azizi F. Dietary Approaches to Stop Hypertension (DASH) Dietary Pattern Is Associated with Reduced Incidence of Metabolic Syndrome in Children and Adolescents. J Pediatr. 2016 Jul;174:178-184	B	Prospective cohort study	Children and adolescents	N= 435	Children, 6-18 years of age; non US; participants of the Tehran Lipid and Glucose Study	4- mercury sphygomonometer	DASH diet	N/A	Metabolic syndrome	No- 2 measurements	The OR (95%CI) of developing MetS in the highest, compared with the lowest, quartile of DASH score was 0.36 (0.14- 0.94) with a linear decreasing trend (P for trend = .023). Also, incidence of hypertension, high fasting plasma glucose, and abdominal obesity decreased with higher adherence to DASH diet (P < .05 for all).	Positive impact of the DASH diet on MetS	No harm reported	B>H	Non-US (Iranian population).
PICOT3	436	added	Ogedegbe G, Chaplin W, Schoenthaler A, Statman D, Berger D, Richardson T, Phillips E, Spencer J, Allegrante JP	N/A	7.2b, 7.2c	2008	A practice-based trial of motivational interviewing and adherence in hypertensive African Americans	Am J Hypertens	Ogedegbe G, Chaplin W, Schoenthaler A, et al. A practice-based trial of motivational interviewing and adherence in hypertensive african americans. American Journal of Hypertension. 2008;21:1137-1143	B	RCT	Adults	N=190	African Americans. Variable social and economic status. Adults with a diagnosis of HTN, taking at least 1 antihypertensive medication with uncontrolled BP on 2 successive office visits; English speaking only, mean age of 54 years	Unknown	Practice based motivational interviewing	Usual case, N=95	Medication adherence		Better adherence to medical treatment (60% vs 47%)	Improved comliance in a high risk population.
PICOT3	437	added	Bosworth HB, Olsen MK, Neary A, Orr M, Grubber J, Svetkey L, Adams M, Oddone EZ	N/A	7.2c	2008	Take Control of Your Blood Pressure (TCYB) study: a multifactorial tailored behavioral and educational intervention for achieving blood pressure control	Patient Educ Couns	Bosworth HB, Olsen MK, Neary A, Orr M, Grubber J, Svetkey L, Adams M, Oddone EZ. Take Control of Your Blood Pressure (TCYB) study: a multifactorial tailored behavioral and educational intervention for achieving blood pressure control. Patient Educ Couns. 2008 Mar;70(3):338-47.	B	RCT	Adults	n=319 cases	Racially diverse; Adults with hypertension (based upon ICD-9 code), mean age 61 years	Unknown	Taylored telephone counseling targeted for individuals based upon their needes, including the inclusion of modules that focus on medication management, adverse effects of antihypertensive medication, memory, knowledge/perception of risk, participatory decision making, diet, weight, exercise, social/medical environment, stress, smoking, alcohol, literacy	Patients randomized to usual treatment of hypertension/home BP assessment (but no taylored behavioral intervention)	Medication adherence	Unknown	96% retention rate at 6 months; Better adherence to recommended medication in the taylored behavioral intervention group versus the control group	Chance for greater medical adherene with taylor behavioral intervention	Time and resource intensive. Although reportedly, only 18 minutes required on bi-monthly basis per patient.	B>H	Self-reported adherence.
PICOT2	438	added	Resnicow K, McMaster F, Bocian A, Harris D, Zhou Y, Snetselaar L, Schwartz R, Myers E, Gotlieb J, Foster J, Hollinger D, Smith K, Woolford S, Mueller D, Wasserman RC	N/A	7.2c	2015	Motivational interviewing and dietary counseling for obesity in primary care: an RCT	Pediatrics	Resnicow K, McMaster F, Bocian A, Harris D, Zhou Y, Snetselaar L, Schwartz R, Myers E, Gotlieb J, Foster J, Hollinger D, Smith K, Woolford S, Mueller D, Wasserman RC. Motivational interviewing and dietary counseling for obesity in primary care: an RCT. Pediatrics. 2015 Apr;135(4):649-57	A	RCT	Children	N = 457	Children, 2- 8 years of age	Unknown	Motivational interviweing	Usual care	BMI at 2 year follow-up	Unknown	MI delivered by providers and RDs (group 3) resulted in statistically significant reductions in BMI percentile.	Positive benefit of motivational interviewing (as adminised by MD or dietician) on BMI	No harm reported	B>H	Limited generalizability because of differences in race, income and education among those who were loss to follow-up.
PICOT2	439	added	Davoli AM, Broccoli S, Bonvicini L, Fabbri A, Ferrari E, D'Angelo S, Di Buono A, Montagna G, Panza C, Pinotti M, Romani G, Storani S, Tamelli M, Candela S, Giorgi Rossi P	N/A	7.2c	2013	Pediatrician-led motivational interviewing to treat overweight children: an RCT	Pediatrics	Davoli AM, Broccoli S, Bonvicini L, Fabbri A, Ferrari E, D'Angelo S, Di Buono A, Montagna G, Panza C, Pinotti M, Romani G, Storani S, Tamelli M, Candela S, Giorgi Rossi P. Pediatrician-led motivational interviewing to treat overweight children: an RCT. Pediatrics. 2013 Nov;132(5):e1236-46	A	RCT	Children	N=372	Italian children, 4 to 7 years of age	Unknown	Motivational interviweing	Usual Care	BMII and lifestyle behaviors at 12 months follow-up	Unknown	The pediatrician-led MI was overall effective in controlling BMI in these overweight children aged 4 to 7 years, even though no effect was observed in male children or when the mother’s education level was low	Benefits of MI on BMI in children (female and higher income)	No benefit and increased time spent in males and lower income families	B>H	Limited generalizability because of differences in coutome by income and gender.
PICOT2	440	added	Broccoli S, Davoli AM, Bonvicini L, Fabbri A, Ferrari E, Montagna G, Panza C, Pinotti M, Storani S, Tamelli M, Candela S, Bellocchio E, Giorgi Rossi P	N/A	7.2c	2016	Motivational Interviewing to Treat Overweight Children: 24-Month Follow-Up of a Randomized Controlled Trial	Pediatrics	Broccoli S, Davoli AM, Bonvicini L, Fabbri A, Ferrari E, Montagna G, Panza C, Pinotti M, Storani S, Tamelli M, Candela S, Bellocchio E, Giorgi Rossi P. Motivational Interviewing to Treat Overweight Children: 24-Month Follow-Up of a Randomized Controlled Trial. Pediatrics. 2016 Jan;137(1)	A	RCT	Children	N=372	Italian children, 4 to 7 years of age	Unknown	Motivational interviweing	Usual Care	BMII and lifestyle behaviors at 12 months follow-up	Unknown	The intervention lost its effectiveness within 1 year of cessation. Sustainable boosters are required for weight control and obesity prevention.	Benefits of MI on BMI in children (female and higher income)	Loss of effect within 1 year of cessation	B>H	Non-US population. Limited generalizability.
PICOT2	441	added	Flattum C, Friend S, Neumark-Sztainer D, Story M	N/A	7.2c	2009	Motivational interviewing as a component of a school-based obesity prevention program for adolescent girls	J Am Diet Assoc	Flattum C, Friend S, Neumark-Sztainer D, Story M. Motivational interviewing as a component of a school-based obesity prevention program for adolescent girls. J Am Diet Assoc. 2009 Jan;109(1):91-4	C	Pilot study	Adolescents	N=20	Adolescent girls, 16-18 years of age; partcipants in the New Moves, school based obesity prevention intervention program	Unknown	Motivational interviewing over an 18 week (7 sessions) period in the setting of an all-girls physical education class that focuses on increasing physical activity, healthy eating and provides social support	N/A	Healthy lifestyle goal setting by the partcipants	Unknown	90% of the participants set at least 2 different goals during the study. It is feasible to implement individual motivational interview sessions as a component of a school-based obesity prevention intervention	Knowledge of the feasibility of a school based motivational intervention intervention	None	B>H	Small sample size.
PICOT2	442	added	Schwartz RP, Hamre R, Dietz WH, Wasserman RC, Slora EJ, Myers EF, Sullivan S, Rockett H, Thoma KA, Dumitru G, Resnicow KA	N/A	7.2c	2007	Office-based motivational interviewing to prevent childhood obesity: a feasibility study	Arch Pediatr Adolesc Med	Schwartz RP, Hamre R, Dietz WH, Wasserman RC, Slora EJ, Myers EF, Sullivan S, Rockett H, Thoma KA, Dumitru G, Resnicow KA. Office-based motivational interviewing to prevent childhood obesity: a feasibility study. Arch Pediatr Adolesc Med. 2007 May;161(5):495-501	C	Feasibility study	Children	N=91	Children, 3- 7 years of age	Unknown	Motivational interviweing	N/A	BMII and lifestyle behaviors at 12 months follow-up	Unknown	At 6 months' follow-up, there was a decrease of 0.6, 1.9, and 2.6 body mass index percentiles in the control, minimal, and intensive groups, respectively. The differences in body mass index percentile change between the 3 groups were nonsignificant (P=.85). The patient dropout rates were 2 (10%), 13 (32%), and 15 (50%) for the control, minimal, and intensive groups, respectively. Fifteen (94%) of…	Potential benfiti of MI	challenges of implementation in the outpatientc setting	B>H	Small sample.
PICOT2	443	added	Döring N, Ghaderi A, Bohman B, Heitmann BL, Larsson C, Berglind D, Hansson L, Sundblom E, Magnusson M, Blennow M, Tynelius P, Forsberg L, Rasmussen F	N/A	7.2c	2016	Motivational Interviewing to Prevent Childhood Obesity: A Cluster RC	Pediatrics	Döring N, Ghaderi A, Bohman B, Heitmann BL, Larsson C, Berglind D, Hansson L, Sundblom E, Magnusson M, Blennow M, Tynelius P, Forsberg L, Rasmussen F. Motivational Interviewing to Prevent Childhood Obesity: A Cluster RCT. Pediatrics. 2016 May;137(5)	B	Cluster RCT	Infants and Children	N= 1369	Swedish children (Swedish child health services)- participants of the PRIMROSE trial ; 9 months to 4 years of age	Unknown	39 months of motivational interviewing and cognitive behavioral therapy for the family; total of 9 sessions	No intervention group	Primary outcomes were children’s BMI, overweight prevalence, and waist circumference at age 4.	Unknown	There were no statistically significant differences in children's BMI (β = -0.11, 95% confidence interval [CI]: -0.31 to 0.08), waist circumference (β = -0.48, 95% CI: -0.99 to 0.04), or prevalence of overweight (relative risk = 0.95, 95% CI: 0.69 to 1.32). No significant intervention effects were observed in mothers' anthropometric data or regarding mothers' and children's physical activity habi…	Improved dietary choices in the intervention group versus the non intervention group (e.g., increased intake of vegetables, fruit, and fish; less intake of surgar sweetened beverage, french fries or discretionary calories)	No impact of intervention on BMI, waiste circumference, physical activity, mother's waiste circumference, food habits or physical activity.	B>H	Imperfect implementation of intervention; potential for time lag between motivational interview and observable positive change.
PICOT3	446	136	Gregoski MJ, Barnes VA, Tingen MS, Harshfield GA, Treiber FA	N/A	7.2d	2011	Breathing awareness meditation and LifeSkills Training programs influence upon ambulatory blood pressure and sodium excretion among African American adolescents	J Adolesc Health	Gregoski MJ, Barnes VA, Tingen MS, Harshfield GA, Treiber FA. Breathing awareness meditation and LifeSkills Training programs influence upon ambulatory blood pressure and sodium excretion among African American adolescents. J Adolesc Health. 2011 Jan;48(1):59-64	A	RCT	Adolescents	N= 166	African American adolescents	2-ABPM	3 months of intervention: Breathing awareness meditation (BAM), Botvin LifeSkills Training (LST), and health education control (HEC)	Pre-intervention values	ABPM, urinary sodium excretion	N/A- ABPM	BAM: reduction in school time SBP by -3.7mmHg; no change for LST; more modest change of -0.1mmHg for HEC	Potential for improved hemodynamic function for BAM	LST and HEC show less promise in helping to reduce BP	B>H	Limited study population (only African Americans).
PICOT2/PICOT4	447	30	Barnes VA, Kapuku GK, Treiber FA	N/A	7.2d	2012	Impact of transcendental meditation on left ventricular mass in african american adolescents	Evid Based Complement Alternat Med	Barnes VA, Kapuku GK, Treiber FA. Impact of transcendental meditation on left ventricular mass in african american adolescents. Evid Based Complement Alternat Med. 2012;2012:923153	A	RCT	Adolescents	N= 62	pre-hypertensive African American adolescents; inner schools in Augusta, GA	Unknown	4-month transcendental meditation ™	health education control group	Echocardiographic derived measure of LVH (LVM index, LVM/ht^2.7)	Unknown	4 months of TM (compared to health education) is associated with significant decreases in LVMI and this effect is sustained at 4 months post follow-up	Knowledge of the health benefits of TM, particularly in African American youth	None reported	B>H	Limited study population (only African Americans); limited sample size.
PICOT3	448	166	Sieverdes JC, Mueller M, Gregoski MJ, Brunner-Jackson B, McQuade L, Matthews C, Treiber FA	N/A	7.2d	2014	Effects of hatha yoga on blood pressure, salivary α-Amylase, and cortisol function among normotensive and prehypertensive youth	Journal of Alternative and Complementary Medicine	Sieverdes JC, Mueller M, Gregoski MJ, Brunner-Jackson B, McQuade L, Matthews C, Treiber FA. Effects of Hatha yoga on blood pressure, salivary α-amylase, and cortisol function among normotensive and prehypertensive youth. J Altern Complement Med. 2014 Apr;20(4):241-50.	C	Intervention study	Children	N= 28	7th graders	1	Hatha yoga program (HYP	Art class	BP and other anthropometric data	Yes- 3measurements	Reduction in BP with Yoga	Knowledge of impact of non-pharmacologic therapy on BP in children	No reported harm	B>H	Small sample size.
PICOT3	449	added	Sorof JM, Cargo P, Graepel J, Humphrey D, King E, Rolf C, Cunningham RJ	N/A	7.3	2002	Beta-blocker/thiazide combination for treatment of hypertensive children: a randomized double-blind, placebo-controlled trial	Pediatr Nephrol	Sorof JM, Cargo P, Graepel J, Humphrey D, King E, Rolf C, Cunningham RJ. Beta-blocker/thiazide combination for treatment of hypertensive children: a randomized double-blind, placebo-controlled trial. Pediatr Nephrol. 2002 May;17(5):345-5	A	RCT	Children	N=94 (N=62 treated, N=32 placecbo)	Hypertensive children, 6-17 years of age from the US and Brazil	4- mercury sphyngomanometer	bisoprolol fumarate/hydrochlorothiazide (B/HT); 2-week single-blind placebo screening period, a 6-week double-blind dose titration period, a 4-week double-blind dose maintenance period, and a 2-week double-blind dose-tapering period.	placebo	BP	Yes- 3 measurements	Overall, treatment w/ this combination agent resulted in significant reductions in SBP and DBP.	Bisoprolol/HCTZ is an effective combination agent for the treatment of hypertension in children	53% of those treatedd reported adverse events (mainly headache) but this rate was still less than the 75% who reported adverse events in the placebo group. Most patients did not achieve effective BP reduction.	B>H	Small sample size. Lack of appropriate BP reduction with treatment.
PICOT3	450	356	Trachtman H, Hainer JW, Sugg J, Teng R, Sorof JM, Radcliffe J; Candesartan in Children with Hypertension (CINCH) Investigators.	21	7.3a; Table 8, Table 9	2008	Efficacy, safety, and pharmacokinetics of candesartan cilexetil in hypertensive children aged 6 to 17 years	Journal of Clinical Hypertension	Trachtman H, Hainer JW, Sugg J, Teng R, Sorof JM, Radcliffe J; Candesartan in Children with Hypertension (CINCH) Investigators. Efficacy, safety, and pharmacokinetics of candesartan cilexetil in hypertensive children aged 6 to 17 years. J Clin Hypertens (Greenwich). 2008 Oct;10(10):743-50.	A	RTC	Children	N= 240	Children 6-17 years (240 patients); 47% black; United States and Europe	4- manual BP	1 week placebo followed by 4 weeks of high, medium, or low dose cadesartan cilexetil with then an additional up to 1-year follow-up	placebo	blood pressure	Yes- 3 measurements	Systolic (SBP) / diastolic (DBP) blood pressure declined 8.6 / 4.8–11.2 / 8.0 mm Hg with candesartan and 3.7 / 1.8 mm Hg with placebo (P<.01) compared to placebo for SBP and for the mid and high doses for DBP; placebo-corrected 4.9 / 3.0–7.5 / 6.2 mm Hg). The slopes for dose were not, however, different from zero (P>.05).The response rate (SBP and DBP <95th percentile) after 1 year was 53%	Candesartan is an effective, well-tolerated antihypertensive agent for children aged 6 to 17 years and has a phamcolinetic profile that is similar to that in adults	None reported	B>H	Limited to nonrenovascular hypertension.
PICOT3/ PICOT4	452	12/158	Schaefer F, Litwin M, Zachwieja J, Zurowska A, Turi S, Grosso A, Pezous N, Kadwa M	21	7.3a	2010	A 12-week, randomized, double-blind study comparing the efficacy and safety of valsartan and enalapril in hypertensive children aged 6-17 years	Journal of hypertension	Schaefer F, Litwin M, Zachwieja J, Zurowska A, Turi S, Grosso A, Pezous N, Kadwa M. Efficacy and safety of valsartan compared to enalapril in hypertensive children: a 12-week, randomized, double-blind, parallel-group study. J Hypertens. 2011 Dec;29(12):2484-90.	A	Multicenter RCT	Children	N= 300	Chidren (6-17 years of age) with documented BP >95th percentile. Multi-race , gender and Hispanic/non-Hispanic.	4- calibrated sphygmomanometer or 1- calibrated oscillometric device	Placebo lead in + 12 week treatment period (enalapril versus Valsartan; 1/2 dose, full dose, max dose)	Enalapril (non inferiority)	Primary: Change in Mean SBP compared to baseline; Secondary: Change in Mean DBP compared to baseline	Yes- at least 3 measurements	Valsartan is not-inferior to enalapril for reducing blood pressure. Change in BP. -13/-1.8mmHg for the valsartan group. -11.8/-7.9mmHg in the enalapril treatment group.	additional effective anti-hypertensive agent class	Adverse events: 3% (both the enalapril and valsartan treatment groups); incidence of SAEs low at 1.7%. Discontinuation rate of 4.6% due to adverse events (N=2 nausea, N=1 arrhythmia, N=1 dehydration, N-1 dizziness, N=1 headache, N=1 hyperkalemia, N=1 vomiting).	B>H	No placebo control.
PICOT3	453	113	Gartenmann AC, Fossali E, von Vigier RO, Simonetti GD, Schmidtko J, Edefonti A, Bianchetti MG	21	7.3a	2003	Better renoprotective effect of angiotensin II antagonist compared to dihydropyridine calcium channel blocker in childhood	Kidney Int	Gartenmann AC, Fossali E, von Vigier RO, Simonetti GD, Schmidtko J, Edefonti A, Bianchetti MG. Better renoprotective effect of angiotensin II antagonist compared to dihydropyridine calcium channel blocker in childhood. Kidney Int. 2003 Oct;64(4):1450-4.	A	RCT	Children	N= 26	Children with chronic kidney disease; 6.1 to 17 years	Unknown	Irbesartan	Amlodipine	Proteinuria BP	Unknown	Irbesartan is better at lowering proteinuria. Both reduced BP.	Irbesartan more effective at lowering BP.	Increase in serum K (slightly) associated with use of irbesartan.	B>H	Small sample size. Limited to children with chronic kidney disease.
PICOT3	455	325	Flynn JT	21	7.3a	2005	Efficacy and safety of prolonged amlodipine treatment in hypertensive children	Pediatr Nephrol	Flynn JT. Efficacy and safety of prolonged amlodipine treatment in hypertensive children. Pediatr Nephrol. 2005 May;20(5):631-5.	C	Retrospective cohort study (review of data from the extension phase of a prior amlodipine treatment study)	Children	N= 333	solid organ transplant, renal disease, primary HTN, drug-induced HTN ; mean age 9.8+/-4.8 years (range 1.3-16.9)	1	amlodipine for at least 6 months	none	blood pressure control and medication side effects	Unknown	8 mmHg decrease in systolic BP, 11mmHg decrease in diastolic BP. No one needed to stop the medication due to side effects. Medication dose remained stable throughout study period.	Amlodipine is safe and effective long-term in controlling HTN in children. All children achieved BP control.	Low reported rates of adverse events. Of the 4 who reported gingival hyperplasia, all were receiving cyclosporine	B>H	Small sample size.
PICOT3/ PICOT4	456	331/ 156	Schaefer F, Coppo R, Bagga A, Senguttuvan P, Schlosshauer R, Zhang Y	21	7.3a	2013	Efficacy and safety of valsartan in hypertensive children 6 months to 5 years of age	Journal of Hypertension	Schaefer F, Coppo R, Bagga A, Senguttuvan P, Schlosshauer R, Zhang Y, Kadwa M. Efficacy and safety of valsartan in hypertensive children 6 months to 5 years of age. J Hypertens. 2013 May;31(5):993-1000.	A	RCT	Children	N= 75	hypertensive children ages 6m-5 years	Unknown	6 week high, medium, low dose valsartan and then 18 week open-label valsartan	placebo	blood pressure	Unknown	Valsartan decreased BP in a trended dose-response way	Valsartan is effective in BP control	3% adverse events	B>H	Limited sample size.
PICOT3	457	316	Batisky DL, Sorof JM, Sugg J, Llewellyn M, Klibaner M, Hainer JW, Portman RJ, Falkner B; Toprol-XL Pediatric Hypertension Investigators	21	7.3a	2007	Efficacy and Safety of Extended Release Metoprolol Succinate in Hypertensive Children 6 to 16 Years of Age: A Clinical Trial Experience	Journal of Pediatrics	Batisky DL, Sorof JM, Sugg J, Llewellyn M, Klibaner M, Hainer JW, Portman RJ, Falkner B; Toprol-XL Pediatric Hypertension Investigators. Efficacy and safety of extended release metoprolol succinate in hypertensive children 6 to 16 years of age: a clinical trial experience. J Pediatr. 2007 Feb;150(2):134-9, 139.	A	RTC	Children	N= 140	Children with HTN	4- mercury sphyngomanometer	Placebo vs high, medium, or low dose metoprolol over 4 weeks	placebo	blood pressure	Yes- at least 3 measurements	With ER metoprolol ER metoprolol 0.2 mg/kg 5.2/ 3.1 mmHg; 1.0 mg/kg 7.7/ 4.9 mmHg; 2.0 mg/kg 6.3/ 7.5 mmHg.	Improved systolic and diastolic BP control	Few reported cases of dose decrease due to symptoms while taking metoprolol	B>H	None.
PICOT3/ PICOT4	458	251, 202	Wells T, Blumer J, Meyers KE, Neto JP, Meneses R, Litwin M, Vande Walle J, Solar-Yohay S, Shi V, Han G; Valsartan Pediatric Hypertension Study Group	21	7.3a	2011	Effectiveness and safety of valsartan in children aged 6 to 16 years with hypertension	J Clin Hypertens (Greenwich)	Wells T, Blumer J, Meyers KE, Neto JP, Meneses R, Litwin M, Vande Walle J, Solar-Yohay S, Shi V, Han G; Valsartan Pediatric Hypertension Study Group.. Effectiveness and safety of valsartan in children aged 6 to 16 years with hypertension. J Clin Hypertens (Greenwich). 2011 May;13(5):357-65	A	Prospective 4-week, double-blind, randomized multiccenter trial followed by a 52-week, open-label phase	Children	N= 245	Children 6 to 16 years of age with SBP > 95th percentile	Unknown	Valsartan: low dose (10mg) medium dose (40mg), and high dose (80mg) during phase 1 (weeks); 52 week open label treatment dose of 40mg PO daily with stepwise increased in valsartan dose if SBP >95th percentile. If still elevated, then HCTZ added	Low dose Valsartan	BP	Yes- 3 measurements	Dose-dependent reductions in sitting systolic blood pressure (SSBP) and sitting diastolic blood pressure (SDBP) were observed after 2 weeks (low dose, -7.9 .)4.6 mm Hg; medium dose, -9.6 /-5.8 mm Hg; high dose, -11.5 / -7.4 mm Hg [P<.0001 for all groups]). During the withdrawal phase, SSBP and SDBP were both lower in the pooled valsartan group than in the pooled placebo group (SSBP, -2.7 mm Hg [P…	Effective lowering of BP with Valsartan administration	1 reported SAE: gastroenteritis	B>H	Nonuniform therapy during the 52-week open label period.
PICOT3	459	163	Trachtman H, Frank R, Mahan JD, Portman R, Restaino I, Matoo TK, Tou C, Klibaner M	21	7.3	2003	Clinical trial of extended-release felodipine in pediatric essential hypertension	Pediatric nephrology (Berlin, Germany)	Clinical trial of extended-release felodipine in pediatric essential hypertension	A	RCT	Children	N= 133	Children 6-16 years of age with SBP or DBP >95th percentile; including females and African Americans	4- mercury sphyngomanometer	felodipine ER (low-2.5mg, medium- 5mg, and high- 10mg) dose groups	placebo	SBP and DBP	Yes- 3 measurements	The 5-mg dose of felodipine ER resulted in a significant decline in trough sitting, standing, and supine DBP (placebo-adjusted, -4.6, -5.06, and -5.05 mmHg, respectively, P<0.05) compared with placebo. However, there was no significant decline in SBP.	Effective reduction in BP with administration of felodipine	1 reported AE (but no serious adverse events)	B>H	Insufficient sample size in the felodipine HD (10-mg) treatment group.
PICOT3/ PICOT4	460	165/ 165	Shahinfar S, Cano F, Soffer BA, Ahmed T, Santoro EP, Zhang Z, Gleim G, Miller K, Vogt B, Blumer J, Briazgounov I	21	7.3a	2005	A double-blind, dose-response study of losartan in hypertensive children	Am J Hypertens	Shahinfar S, Cano F, Soffer BA, Ahmed T, Santoro EP, Zhang Z, Gleim G, Miller K, Vogt B, Blumer J, Briazgounov I. A double-blind, dose-response study of losartan in hypertensive children. Am J Hypertens. 2005 Feb;18(2 Pt 1):183-90.	B	RCT: Period 1 3 week treatment phase (low, med, high dose treatment) followed by a 2 week randomized washout period (placebo control)	Children	N=175	Children 6 to 16 years of age	4- mercury sphyngomanometer	low (2.5/5mg per day)), medium (25/50mg per day) and high dosing (50/100mg per day) of losartan by age (<50kg and >= 50kg)	no control for period 1; placebo control for period 2	Change in mean blood pressure	Yes- at least 3 measurements	Once daily dosing of losartan at 0.7mg/kg/dose (max: 50mg per day) effectively reduces diastolic blood pressure. Max dose of 1.44mg/kg/dose is tolerated in children. Reduction in trough DBP of -6mmHg(low), -11.7 (medium), and -12.2 (high dose) treatment groups. Reduction in trough SBP of -4.4 mmHg (low), -10.0 (medium), and -8.6(high dose)	Target doses are effective at reducing blood pressure with very little side effect	Although rare, the most common reported side effects: headache (1 in dose dose group, 2 in the high dose group)	B>H	No placebo control during the initial 3-week treatment phase.
PICOT3	461	21	Hazan L, Hernández Rodriguez OA, Bhorat AE, Miyazaki K, Tao B, Heyrman R	21	7.3a	2010	A double-blind, dose-response study of the efficacy and safety of olmesartan medoxomil in children and adolescents with hypertension	Hypertension	Hazan L, Hernández Rodriguez OA, Bhorat AE, Miyazaki K, Tao B, Heyrman R; Assessment of Efficacy and Safety of Olmesartan in Pediatric Hypertension Study Group.. A double-blind, dose-response study of the efficacy and safety of olmesartan medoxomil in children and adolescents with hypertension. Hypertension. 2010 Jun;55(6):1323-30.	A	RCT: 3 week non-placebo controlled treatment phase followed by wash-out phase	Children	N=422	Children 6 to 16 years of age	4- sphyngomanometer (aneroid versus mercury not specified)	Olmesartan: low dose (2.5 or 5 mg) and high dose (20 or 40mg) treatment groups. Treatment for 3 weeks.	no placebo control for 3 week treatment period; placebo control during washout phase	SBP, DBP	Yes- at least 3 measurements	Low and high dose Olmesartan effective in BP reducion in children. Following 3 weeks of therapy, change in SBP of -7.5mmHg (low dose) and change in SBP -12.5mmHg (high dose) for cohort A. For cohort B (primarily African American cohort) less of a change in SBP of -4mmHg (low dose) or a change of SBP of -10mmHg (high dose). Similar changes in DBP.	Olmesatan can effectively lower SBP.	No placebo control during 3 week treatment phase.	B>H	No placebo control during the 3-week treatment phase but also slightly lesser effectiveness for cohort B (100% African Americans).
PICOT3/ PICOT4	462	37	Flynn JT, Newburger JW, Daniels SR, Sanders SP, Portman RJ, Hogg RJ, Saul JP	21	7.3a	2004	A randomized, placebo-controlled trial of amlodipine in children with hypertension	Journal of Pediatrics	Flynn JT, Newburger JW, Daniels SR, Sanders SP, Portman RJ, Hogg RJ, Saul JP; PATH-1 Investigators. A randomized, placebo-controlled trial of amlodipine in children with hypertension. J Pediatr. 2004 Sep;145(3):353-9.	A	RCT; placebo washout	Children and adolescent	N=268; 6 -16 years of age	HTN	1	Amlodipine (2.5 and 5 mg)	Placebo - washout	SBP	Yes- 4 measurements	Amlodipine resulted in a significant reduction in SBP Dose-response. Change in SBP -9mmHg and DBP -4mmHg following receipt of higher doses.	Effective decline in SPB/DBP with treatment.	Few reported adverse events	B>H	Short duration of therpay (8 weeks). No placebo control.
PICOT4	464	512	Seeman T, Dusek J, Vondrák K, Flögelová H, Geier P, Janda J	21, 24, 25	7.3a, 8.1b	2004	Ramipril in the treatment of hypertension and proteinuria in children with chronic kidney diseases	American Journal of Hypertension	Seeman T, Dusek J, Vondrák K, Flögelová H, Geier P, Janda J. Ramipril in the treatment of hypertension and proteinuria in children with chronic kidney diseases. Am J Hypertens. 2004 May;17(5 Pt 1):415-20	B	Cross-sectional, prospective, uncontolled, not blinded	Children, adolescents, and young adults	N= 31; children ages 1.9 - 19.8 years (median age 11.3 yrs) with various chronic nephropathies and hypertension or proteinuria.	16 boys, 15 girls. Hypertension (HT) alone in 6, HT and proteinuria in 23, proteinuria alone in 2.	2	Ramipril for 6 months as single daily dose in AM at 1.5mg/m2/day. Dose was doubled if mean ABP values were not < 95th %ile after 1 month of treatment. Maxilmum dose of ramipril 6 mg/m2/day. 27 children received ramipril alone, 4 were already on other antihypertensive agents and 1 was on immunosuppressive therapy. The antihypertensive regimen and immunosuppressive regimen was not changed for at le…	None	Ramipril normalized blood pressure in 55% of children and ameliorated the degree of HT in the remainder. Ramipril had an antiproteinuric effect in 84% of children with pathologic proteinuria.	N/A- ABPM	Blood pressure: After 6 months of ramipril, mean daytime systolic, diastolic and nightime systolic BP decreased in 28/29 children with HT and mean nightime diastolic BP decreased in 26 children. All changes in BP were statistically significant. Th initial dose of ramipril had to be increased in 16 children so that at the end of the study the mean ramipril dose was 2.5 mg/m2/day. Nightime dip in S…	Effective BP reduction using ramipril	10% of partcipants with adverse event (N=1 , cough, N=2 hyperkalemia)	B>H	Small sample size. Uncontrolled study.
PICOT3	465	487	Hammer GB, Verghese ST, Drover DR, Yaster M, Tobin JR	21, 27	7.3a, 11.1	2008	Pharmacokinetics and pharmacodynamics of fenoldopam mesylate for blood pressure control in pediatric patients	BMC anesthesiology	Hammer GB, Verghese ST, Drover DR, Yaster M, Tobin JR. Pharmacokinetics And Pharmacodynamics Of Fenoldopam Mesylate For Blood Pressure Control In Pediatric Patients. BMC Anesthesiol. 2008 Oct 6;8:6.	C	Cohort intervention	Children	N=77 (N=16 placebo, N= 61 treatment)	Children 0-12 yrs undergoing surgery	4- arterial measurement	Fenoldopam: placebo or fenoldopam 0.05, 0.2, 0.8 or 3.2 mcg/kg/min	Placebo	BP response	Unknown	Lowering of BP noted during blinded treatment with doses of 0.8-3.2mcg/k/min. Further reduction seen in open label treatment at 1-1.2 mcg/k/min. Well tolerated.	Fenoldopam is a rapid-acting, effective agent for intravenous control of blood pressure in children	Large number of cases of drug continuation. The study drug was discontinued in twenty-seven patients during the openlabel period,: seven were discontinued due to adverse events (AEs) and twenty due to other reasons (e.g., hypotension no longer desired). The AEs that caused the openlabel study drug to be discontinued included hypotension (N = 3), hemorrhage (N = 3) and tachycardia (N = 1).	B>H	Small sample size.
PICOT3/4	467	587	Li JS, Flynn JT, Portman R, Davis I, Ogawa M, Shi H, Pressler ML	21	7.3a	2010	The efficacy and safety of the novel aldosterone antagonist eplerenone in children with hypertension: a randomized, double-blind, dose-response study	Journal of Pediatrics	Li JS, Flynn JT, Portman R, Davis I, Ogawa M, Shi H, Pressler ML. The efficacy and safety of the novel aldosterone antagonist eplerenone in children with hypertension: a randomized, double-blind, dose-response study. J Pediatr. 2010 Aug;157(2):282-7.	A	DB RCT	Children	N= 304	Children, 4-16 years of age	1	Eplereone: low-dose (25 mg daily), middle-dose (25 mg twice daily), or high-dose (50 mg twice daily) (phase A), then rerandomized to active therapy or placebo for another 4 weeks (phase B).	Placebo	SBP	Yes- at least 3 measurements	During phase A, mean SBP decreased from baseline by 8 mm Hg, and diastolic blood pressure (DBP) decreased by up to 3.8 mm Hg; no dose-response relationship was demonstrated. Mean differences in SBP from placebo during phase B were -2.61 for the low-dose group, +2.32 for the middle-dose group, and -2.76 mm Hg for the high-dose group; only the reduction in the high-dose group was statistically sign…	BP reduction	Of all adverse events reported, 274 were of mild severity, 106 were of moderate severity, and 18 were severe	B<H	Lack of data addressing effectiveness in children on different diets and in targeted subpopulations, such as those with intrinsic renal disease, high or low renin levels, and metabolic syndrome.
PICOT4	470	124 (PICOT4)/ 510 (PICOT3)	Menon S, Berezny KY, Kilaru R, Benjamin DK Jr, Kay JD, Hazan L, Portman R, Hogg R, Deitchman D, Califf RM, Li JS	21	7.3b, 10	2006	Racial differences are seen in blood pressure response to fosinopril in hypertensive children	Am Heart J	Menon S, Berezny KY, Kilaru R, Benjamin DK Jr, Kay JD, Hazan L, Portman R, Hogg R, Deitchman D, Califf RM, Li JS. Racial differences are seen in blood pressure response to fosinopril in hypertensive children. Am Heart J. 2006 Aug;152(2):394-9.	A	RCT, placebo controlled	Children	N=253	Children 6-16 years of age. 60.1% white (152/253), 20.6% black (52/253), 13.8% Hispanic (35/253), 2.0% Asian (5/253), 0.4% Native American (1/253), and 3.2% (8/253) children classified as other or of mixed race.	Unknown	Fosinopril	Placebo	BP	Yes- 3 measurements	Fosinopril was effective in treating hypertension, but black children required a higher dose per body weight in order to achieve adequate control.	Fosinopril is effective in lowering BP in children	Higher doses required to control BP	B>H	Pre- and post-treatment renin levels were not obtained to evaluate changes in levels in response to therapy. Insufficient enrollment of Asian and Hispanic children.
PICOT4	472	162	Seeman T, Dostálek L, Gilík J	N/A	7.3c	2012	Control of hypertension in treated children and its association with target organ damage	American Journal of Hypertension	Seeman T, Dostálek L, Gilík J. Control of hypertension in treated children and its association with target organ damage. Am J Hypertens. 2012 Mar;25(3):389-95.	C	Retrospective cohort study	Children and Adolescents	N= 195	Mean age 14 years; children (2.1-18.9); retrospective study between 1995 and 2008; N=166 with secondary hypertension and N=29 with primary hypertension	2-ABPM; 4- mercury sphyngomanometer	ACEi, CCB, Beta blocker, diuretic	None	Control of HTN (defined as systolic and diastolic BP index during day and night <1.0 or BP load <25%)	Yes- ABPM	Approximately 50% of children treated for hypertension achieve control of BP using monotherapy (BP as assessed using ABPM) regardless of whether or not they have primary or secondary hypertension. ACEI monotherapy significantly more effective than CCB in persons with renovascular hypertension. Prevalence of LVH significantly higher in children with uncontrolled HTN than those with controlled.	Knowledge of the effectiveness of antihypertensive monotherapy in controlling BP	Only 50% BP control among children with primary and secondary HTN.	B>H	Retrospective study design.
PICOT4	473	added	Redwine K, Howard L, Simpson P, Li SH, Yan K, James L, Blumer J, Sullivan J, Ward R, Wells T; Network of Pediatric Pharmacology Research Units Ward R, Wells T	22	7.4c	2012	Effect of placebo on ambulatory blood pressure monitoring in children	Pediatr Nephrol	Redwine K, Howard L, Simpson P, Li SH, Yan K, James L, Blumer J, Sullivan J, Ward R, Wells T; Network of Pediatric Pharmacology Research Units.. Effect of placebo on ambulatory blood pressure monitoring in children. Pediatr Nephrol. 2012 Oct;27(10):1937-42	A	Randomized cross over study	Children and adolescents	N= 97	Children and adolscents 5 – 16 years of age with elevated blood pressure as part of one of five participating sites of the Network of Pediatric Pharmacology Research Units (National Institute of Child Health and Human Development)	2- ABPM; 4- aneroid sphyngomanometer	Placebo pill (Children completed 2 study visits over a 2 week period. At each visit, subjects underwent 6 auscultatory BP measurements using a calibrated aneroid manometer followed by a 24-hour ambulatory monitoring period utilizing the Space Labs 90217 oscillometric monitor (Issaquah, WA). At Visit 1, eligible subjects were randomized to receive a placebo between the auscultatory measurements an…	No placebo pill	ABPM results: overall mean 24-hour, day, and night SBP and DBP	Yes- 3 measurements (aneroid device)	Overall mean 24-hour, day, and night SBP and DBP were similar between visits. One-quarter of the population had systolic HTN (26.09% with placebo; 23.91% without placebo, p=0.62) and one-tenth had diastolic HTN (DBP 9.78% with placebo; 10.87% without placebo, p=0.71)	ABPM represents an effective tool for measuring BP in pediatric anti-hypertensive trials and supports the potential elimination of the placebo arm in comparative dose studies of anti-hypertensive drugs in children. Confirmed validity of Space Labs 90217 ABPM device	None reported	B>H	High drop out: only 79% of the population who completed the study satisfactorily completed the ABPM at both visits.
PICOT4	474	added	Halbach SM, Hamman R, Yonekawa K, Hanevold C	22	7.4c	2016	Utility of ambulatory blood pressure monitoring in the evaluation of elevated clinic blood pressures in children	J Am Soc Hypertens	Halbach SM, Hamman R, Yonekawa K, Hanevold C. Utility of ambulatory blood pressure monitoring in the evaluation of elevated clinic blood pressures in children. J Am Soc Hypertens. 2016 May;10(5):406-12	C	Retrospective cohort study	Children, adolescents and young adults	N= 206	Persons 4 to 20 years of age; Single center from November 2007 to October 2011	2-ABPM	N/A	N/A	ABPM values	N/A- ABPM	Poor correlation between hypertensive status based on clinic BP and diagnosis on ABPM, and evidence for a white coat effect. Among treated patients, ABPM results resulted in medication changes in 63%.	Ability to accurately diagnose hypertension may be limited without the use of ABPM	Harm of not using ABPM to diagnose HTN	B>H	Single center and may reflect the standard practice.
PICOT4	477	added	Williams B, MacDonald TM, Morant S, Webb DJ, Sever P, McInnes G, Ford I, Cruickshank JK, Caulfield MJ, Salsbury J, Mackenzie I, Padmanabhan S, Brown MJ; British Hypertension Society's PATHWAY Studies Group	22	7.2d	2015	Spironolactone versus placebo, bisoprolol, and doxazosin to determine the optimal treatment for drug-resistant hypertension (PATHWAY-2): a randomised, double-blind, crossover trial	Lancet	Williams B, MacDonald TM, Morant S, Webb DJ, Sever P, McInnes G, Ford I, Cruickshank JK, Caulfield MJ, Salsbury J, Mackenzie I, Padmanabhan S, Brown MJ; British Hypertension Society's PATHWAY Studies Group.. Spironolactone versus placebo, bisoprolol, and doxazosin to determine the optimal treatment for drug-resistant hypertension (PATHWAY-2): a randomised, double-blind, crossover trial. Lancet. 2…	B	DB cross-over trial	Adults	N= 230	Adults, 18 to 79 years of age; United Kingdom	1 (in home BP)	Addition of spironolaccone. 12 months of therapy	Placebo	Home BP	Yes- 3 measurements in the AM and 3 measurements in the PM or 4 consecutive days	Average reduction in home systolic blood pressure by spironolactone was superior to placebo (–8·70 mm Hg [95% CI –9·72 to –7·69]; p<0·0001), superior to the mean of the other two active treatments (doxazosin and bisoprolol; –4·26 [–5·13 to –3·38]; p<0·0001), and superior when compared with the individual treatments; versus doxazosin (–4·03 [–5·04 to –3·02]; p<0·0001) and versus bisoprolol (–4·48 …	Spironolactone was the most eff ective add-on drug for the treatment of resistant hypertension.	Low rates of adverse events	B>H	Adults only.
PICOT4	478	added	Mitsnefes M, Ho PL, McEnery PT	23	8.1a	2003	Hypertension and progression of chronic renal insufficiency in children: a report of the North American Pediatric Renal Transplant Cooperative Study (NAPRTCS)	J Am Soc Nephrol	Mitsnefes M, Ho PL, McEnery PT. Hypertension and progression of chronic renal insufficiency in children: a report of the North American Pediatric Renal Transplant Cooperative Study (NAPRTCS). J Am Soc Nephrol. 2003 Oct;14(10):2618-22	C	Retrospective cohort study	Children	N= 3834	Children with kidney disease; boys (63.3%) , white (62%); 18.3% African American, and 14.3% Hispanic	Unknown	N/A	N/A	eGFR	Unknown	Systolic hypertension was a significant independent predictor of progression of CRI (P 0.003). Other significant predictors of CRI progression in this model included older age (P 0.0001), African American ethnicity (P 0.03), acquired cause of renal disease (P <0.0001), and baseline eGFR 50 ml/min·1.73 m2 (P 0.0001).	Knowledge of the impact of HTN on renal disease progression	Elevated BP is a risk factor for more advanced renal disease	B>H	Use of antihypertensive agent use as a marker of hypertension (unable to determine HTN severity).
PICOT4	481	added	Mitsnefes MM, Kimball TR, Kartal J, Witt SA, Glascock BJ, Khoury PR, Daniels SR	N/A	8.1a	2006	Progression of left ventricular hypertrophy in children with early chronic kidney disease: 2-year follow-up study	J Pediatr	Mitsnefes MM, Kimball TR, Kartal J, Witt SA, Glascock BJ, Khoury PR, Daniels SR. Progression of left ventricular hypertrophy in children with early chronic kidney disease: 2-year follow-up study. J Pediatr. 2006 Nov;149(5):671-5	C	Prospective cohort study	Children	N=41 (N=31=CKD; N=10 w/ ESRD)	Children with ESRD, CKD	2- ABPM	N/A	N/A	N/A	N/A- ABPM	LVH progresses more rapidly during the early stages of CKD. Six (19%) of 31children had LVH at baseline; the prevalence of LVH increased to 39% at 2-year follow-up. Eccentric LVH was the most common geometric pattern throughout the study. Among 25 children with initially normal LVM index, 8 (32%) developed new LVH. Children with incident LVH had significantly higher mean parathyroid hormone (iPTH…	Knowledge of the factors contributing to the development of LVH is children with HTN and CKD.	None identified	B>H	Small sample size. Incomplete follow-up data.
PICOT4	482	added	SPRINT Research Group., Wright JT Jr, Williamson JD, Whelton PK, Snyder JK, Sink KM, Rocco MV, Reboussin DM, Rahman M, Oparil S, Lewis CE, Kimmel PL, Johnson KC, Goff DC Jr, Fine LJ, Cutler JA, Cushman WC, Cheung AK, Ambrosius WT	23	8.1a	2015	SPRINT Research Group., Wright JT Jr, Williamson JD, Whelton PK, Snyder JK, Sink KM, Rocco MV, Reboussin DM, Rahman M, Oparil S, Lewis CE, Kimmel PL, Johnson KC, Goff DC Jr, Fine LJ, Cutler JA, Cushman WC, Cheung AK, Ambrosius WT. A Randomized Trial of Intensive versus Standard Blood-Pressure Control. N Engl J Med. 2015 Nov 26;373(22):2103-16	N Engl J Med	SPRINT Research Group., Wright JT Jr, Williamson JD, Whelton PK, Snyder JK, Sink KM, Rocco MV, Reboussin DM, Rahman M, Oparil S, Lewis CE, Kimmel PL, Johnson KC, Goff DC Jr, Fine LJ, Cutler JA, Cushman WC, Cheung AK, Ambrosius WT. A Randomized Trial of Intensive versus Standard Blood-Pressure Control. N Engl J Med. 2015 Nov 26;373(22):2103-16	A	RCT, 102 sites	Adults	N= 9361	Adults (age 50 years of age or above) with SBP of 130mmHg or higher; multi-ethnic, race and gender study	1	Intenstive versus standard HTN treatment strategy	standard treatment group	CVD related events	Yes- at least 3 measurements	—Among patients at high risk for cardiovascular events but without diabetes, targeting a systolic blood pressure of less than 120 mm Hg, as compared with less than 140 mm Hg, resulted in lower rates of fatal and nonfatal major cardiovascular events and death from any cause, although significantly higher rates of some adverse events were observed in the intensivetreatment group	Knowledge of the potential benefif of extensive BP reduction in CVD related outcome	Greater risk of hypotension, syncope and renal injury in the intensive therapy treatment group	B>H	Adult only.
PICOT4	483	added	Wong H, Mylrea K, Feber J, Drukker A, Filler G	24	8.1b	2006	Prevalence of complications in children with chronic kidney disease according to KDOQI	Kidney Int	Wong H, Mylrea K, Feber J, Drukker A, Filler G. Prevalence of complications in children with chronic kidney disease according to KDOQI. Kidney Int. 2006 Aug;70(3):585-90	C	Cross-sectional study	Children	N= 366	Children with CKD	Unknown	N/A	N/A	Prevalence of complications in children with CKD.	Unknown	Fifty seven percent of patients had CKD stage 1, 29.0% stage 2, 10.4% stage 3 and 4.1% stages 4+5. Uropathies (31%) were the most prevalent causes of CKD. Glomerular disease accounted for 27%. The overall prevalence of complications was as follows: hypertension 70.2%, anemia 36.6%, proteinuria 11.5%, and metabolic bone disease 16.9%. Metabolic bone disease and anemia occurred frequently, even wit…	Konwledge of potential complications associated with CKD	High prevalence of hypertension among all stages of HTN	B>H	Hypertension defined as use of antihypertensive medication or SBP >2 SDs above the mean.
PICOT3/ PICOT4	484	140/169	Simonetti GD, von Vigier RO, Konrad M, Rizzi M, Fossali E, Bianchetti MG	23/25	8.1b	2006	Candesartan cilexetil in children with hypertension or proteinuria: preliminary data	Pediatr Nephrol	Simonetti GD, von Vigier RO, Konrad M, Rizzi M, Fossali E, Bianchetti MG. Candesartan cilexetil in children with hypertension or proteinuria: preliminary data. Pediatr Nephrol. 2006 Oct;21(10):1480-2.	C	Prelminary study	Children	N= 17	Children in receipt of candesarant	Unknown	Candesartan	N/A	BP	Unknown	Candesartan reduced SBP and DBP in patients with proteinuria. The albumin/creatinine ratio was also decreased.	Effective decrease in BP with adminitration of candesartan	Hyperkalemia in receipt of candesatan (incr in K by 0.5mg/dL)	B>H	Limited sample size.
PICOT3	485	205	White CT, Macpherson CF, Hurley RM, Matsell DG	24	8.1b	2003	Antiproteinuric effects of enalapril and losartan: a pilot study	Pediatr Nephrol	White CT, Macpherson CF, Hurley RM, Matsell DG. Antiproteinuric effects of enalapril and losartan: a pilot study. Pediatr Nephrol. 2003 Oct;18(10):1038-43	C	Randomized double blind cross over study, pilot study	Children	N= 6	Children in receipt of losartan or enalapril	Unknown	Losartan or enalapril	N/A	Proteinura, BP	Unknown	The mean reduction in proteinuria with enalapril was 48% (37%–57%) with a standard error of the mean of 3%; with losartan it was 31% (14%–52%) with a standard error of the mean of 7%.	Reduction in proteinuria	Minimal side effects	B>H	Pilot study.
PICOT4	486	191	Webb NJ, Lam C, Loeys T, Shahinfar S, Strehlau J, Wells TG, Santoro E, Manas D, Gleim GW	25	8.1b	2010	Randomized, double-blind, controlled study of losartan in children with proteinuria	Clinical Journal of the American Society of Nephrology	Webb NJ, Lam C, Loeys T, Shahinfar S, Strehlau J, Wells TG, Santoro E, Manas D, Gleim GW. Randomized, double-blind, controlled study of losartan in children with proteinuria. Clin J Am Soc Nephrol. 2010 Mar;5(3):417-24 with proteinuria. Clin J Am Soc Nephrol. 2010 Mar;5(3):417-24.	A, A	Double blind, randomized, parallel-group placebo - or amlodipine - controlled study.	Chiildren and adolescents	N= 306; Children with proteinuria associated with chronic kidney disease of any etiology. Commonly occuring proteinuria etiologies in this study include: focal segmental glomerulosclerosis, hemolytic uremic syndrome, Alport syndrome, and reflux nephropathy. Normotensive stratum ages 1-17 years, mean age 10 years. Hypertensive stratum ages 6-17 years, mean age 12.5 years.	Normotensive stratum defined as SBP and DBP < 95th %ile and not receiving ACE-I or ARB for proteinuria OR SBP and DBP < 90th %ile and receiving ACE-I/ARB for proteinuria. Hypertensive stratum defined as: 1) SBP or DBP > 90th %ile in patients receiving ACE-I/ARB for proteinuria. 2) SBP or DBP > 95th %ile in patients not receiving ACE-I/ARB for proteinuria. 3) Pts. with documented HT taking any ant…	Unknown	Normotensive stratum: 4 week run in placebo followed by 12 weeks losartan starting dose 0.7 mg/kg up titrated at 2 weeks to a max of 1.4 mg/kg/day. Hypertensive stratum: 4 week run in placebo followed by 12 weeks losartan at same dose as nomotensive stratum.	Normotensive stratum: 4 week run in placebo followed by 12 weeks placebo. Placebo sham uptitrated at 2 weeks. Hypertensive stratum: 4 week single-blind amlodipine run in followed by 12 weeks amlodipine. Amlodipine starting dose depended on BP and number of HT medications patient was on at start of trial. Maximum dose of amlodipine: 5 mg/day.	Primary endpoint was change in UPr/Cr on the natural logarithm scale from baseline (end of run in) to the end of 12 weeks of therapy. Proteinuria reduction of 35.8% was seen in the losartan treated patients compared with a 1.4% increase in proteinuria in the amlodipine/placebo group. In the normotensive group, proteinuria was reduced by 34.4% compared with an increase of 2.6% in the placebo group…	Unknown	Amlodipine had a neutral effect on lowering blood pressure in the hypertensive stratum, probably due to "titration inertia" and the fact that only 50% of the hypertensive stratum had been titrated up to 5mg/day of amlodipine. Because a majority of the hypertensive stratum had been on antihypertensive agents before the study, the starting amlodipine doses in the run in were likely sufficient only …	Treatment with losartan at 0.7 to 1.4 mg/kg/day led to a statically significant reduction in proteinuria in proteinuric patients with CKD.	Discontinuation because of adverse events occurred in 0.7% of patients on losartan, 6.7% on amlodipine, and 3.2% on placebo. Angioedema, hyperkalemia, renal dysfunction, and hypotension occurred at low rates across treatment groups. The most common predefined limits of change(PDLC) was increased potassium (defined as > 0.5 mEq/L): normotensive stratum 12 on losartan, 17 on placebo; hypertensive s…	B>H	None reported.
PICOT3	487	193	Webb NJ, Shahinfar S, Wells TG, Massaad R, Gleim GW, Santoro EP, Sisk CM, Lam C. Losartan and enalapril are comparable in reducing proteinuria in children. Kidney Int. 2012 Oct;82(7):819-26	25	8.1b	2012	Losartan and enalapril are comparable in reducing proteinuria in children	Kidney International	Webb NJ, Shahinfar S, Wells TG, Massaad R, Gleim GW, Santoro EP, Sisk CM, Lam C. Losartan and enalapril are comparable in reducing proteinuria in children. Kidney Int. 2012 Oct;82(7):819-26.	A, B	Cohort study (Open label extension phase of PICOT 4 study 191)	Children and adolescents	N= 306	87.6% of the subjects from study 191, ages 1-17 years. Mean age 10.1 years	Unknown	Subjects randomized to receive losartan or enalapril for 3 years	None	Reduction in Upr/Cr for both normotensive and hypertensive subjects for both losartan (26.5%) and enalapril (28.2%) after excluding data on subjects who had taken NSAIDs, corticosteroids, and immunosuppressant for at least 50% of their remaining time in the study. Both . No substantial change in eGFR over the course of the study. Small mean decreases in Cystatin C at all time points for enalapril…	Unknown	Both losartan and enalapril maintained the lower level of proteinuria initially achieved in the base study. These findings are discordant with the ESCAPE trial which reported regression of proteinuria to baseline levels over 42 months (starting after 2 years) in both study arms.	Reduction in proteinuria without any appreciable change in eGFR over 3 years of follow up.	Adverse events were generally consistent with the known AE's of losartan and enalapril. No new or unexpected AE's were observed. Reasonably high levels of reported adverse events: 8.2% w/ renal dysfunction after receipt of losartan and 6.7% after receipt of enalapril; hyperkalemia in 3% of losartan recipients and hyperkalemia in 6.7% of enalapril recipients	B>H	The results from this study are confounded by changes in medical treatment over up to 3 years of observation. BP was monitored during regular clinical visits rather than by ambulatory 24-h BP monitoring or home BP monitoring. No placebo arm.
PICOT3	488	81	Wühl E, Mehls O, Schaefer F; ESCAPE Trial Group	24	8.1b	2004	Antihypertensive and antiproteinuric efficacy of ramipril in children with chronic renal failure	Kidney Int	Wühl E, Mehls O, Schaefer F; ESCAPE Trial Group.. Antihypertensive and antiproteinuric efficacy of ramipril in children with chronic renal failure. Kidney Int. 2004 Aug;66(2):768-76	A	Prospective cohort study (international, radomized trial of 33 European pediatric nephrology centers)	Children	N=352	Children, 3 to 18 years of age	2-ABPM	6 months of ramipril therapy (preceded by a 2 month washout period); Fixed dose of ramipril 6mg/m2; intensified therapy (BP target below the 50th percentile of 24 hour mean arterial pressure)	conventional therapy, goal 24-hour mean arterial blood pressure between the 50th and 95th percentiles	Mean BP by ABPM	N/A-ABPM	Ramipril treatment: reduction of mean BPm by 7.1+/-8mmHg	mean decrease in BP of 11mmHg in hypertensive children	3/352 children with symptomatic hypotension or hyperkalamia	B>H	No placebo control.
PICOT4	489	added	Eppens MC, Craig ME, Cusumano J, Hing S, Chan AK, Howard NJ, Silink M, Donaghue KC	26	8.2	2006	Prevalence of diabetes complications in adolescents with type 2 compared with type 1 diabetes	Diabetes Care	Eppens MC, Craig ME, Cusumano J, Hing S, Chan AK, Howard NJ, Silink M, Donaghue KC. Prevalence of diabetes complications in adolescents with type 2 compared with type 1 diabetes. Diabetes Care. 2006 Jun;29(6):1300-6	C	Clinic based comparative study of complications	Children	N= 1,433 patients with type 1 diabetes; N= 68 patients with type 2 diabetes	Chidren with diabetes from New South Wales, Australia	Unknown	N/A	N/A	Retinopathy, albumin excretion, autonomic neuropathy	Unknown	Higher rates of microalbuminuria among children with Type2 versus Type 1 DM	Knowledge of complications (and likelihood) among children with type 2 versus type 1 DM	Despite shorter duruatoin of disease, Type 2 DM has a greater association with microalbuminuria and hypertension	B>H	Small sample of type 2 DM patients.
PICOT4	490	added	Mayer-Davis EJ, Ma B, Lawson A, D'Agostino RB Jr, Liese AD, Bell RA, Dabelea D, Dolan L, Pettitt DJ, Rodriguez BL, Williams D; SEARCH for Diabetes in Youth Study Group	26	8.2	2009	Cardiovascular disease risk factors in youth with type 1 and type 2 diabetes: implications of a factor analysis of clustering	Metab Syndr Relat Disord	Mayer-Davis EJ, Ma B, Lawson A, D'Agostino RB Jr, Liese AD, Bell RA, Dabelea D, Dolan L, Pettitt DJ, Rodriguez BL, Williams D; SEARCH for Diabetes in Youth Study Group.. Cardiovascular disease risk factors in youth with type 1 and type 2 diabetes: implications of a factor analysis of clustering. Metab Syndr Relat Disord. 2009 Apr;7(2):89-95	C	Comparitve study	Children	N= 1198 with T1DM and N= 95 with T2DM	Children who participated in the SEARCH for Diabetes in Youth study with diabetes diagnosed <20 years, with current age >10 years	Unknown	N/A	N/A	CVD Risk Factors Evaluated by Confirmatory Factor Analysis	Unknown	There is little evidence that a single factor underlies the CVD risk factor pattern in youths with diabetes	Model that describes the complex association between DM and CVD	None	B>H	Limited number of patients with type 2 DM.
PICOT4	491	added	Margeirsdottir HD, Larsen JR, Brunborg C, Overby NC, Dahl-Jørgensen K; Norwegian Study Group for Childhood Diabetes	26	8.2	2008	High prevalence of cardiovascular risk factors in children and adolescents with type 1 diabetes: a population-based study	Diabetologia	Margeirsdottir HD, Larsen JR, Brunborg C, Overby NC, Dahl-Jørgensen K; Norwegian Study Group for Childhood Diabetes.. High prevalence of cardiovascular risk factors in children and adolescents with type 1 diabetes: a population-based study. Diabetologia. 2008 Apr;51(4):554-61	C	Cross-sectional study	Children	N= 1658	Norweigen children	Unknown	N/A	N/A	Risk factors for cardiovascular disease	Unknown	Of the participants, 86% had at least one, 45% at least two and 15% at least three CVD risk factors. Few patients were treated with statins and antihypertensive drugs	Knowledge of the prevelance of risk factors for CVD among diabetic children	Antihypertensive agents and statin therapy was rarely prescribed.	B<H	Not clear whether PB was properly assessed.
PICOT4	492	added	Orchard TJ, Forrest KY, Kuller LH, Becker DJ; Pittsburgh Epidemiology of Diabetes Complications Study	26	8.2	2001	Lipid and blood pressure treatment goals for type 1 diabetes: 10-year incidence data from the Pittsburgh Epidemiology of Diabetes Complications Study	Diabetes Care	Orchard TJ, Forrest KY, Kuller LH, Becker DJ; Pittsburgh Epidemiology of Diabetes Complications Study.. Lipid and blood pressure treatment goals for type 1 diabetes: 10-year incidence data from the Pittsburgh Epidemiology of Diabetes Complications Study. Diabetes Care. 2001 Jun;24(6):1053-9	B	Observational prospective study	Adults	N= 589	H/o childhood diagnosis of TIDM (<17 years of age) and age >18 years of age at baseline	4- sphyngomanometer	N/A	N/A	Lipid profilles, BP; Coronary artery disease (CAD), retinopathy, nephropathy	Unknown	Driven mainly by strong relationships (RR range 1.8 –12.1) with mortality, CAD, and overt nephropathy, suggested goal levels are as follows: LDL cholesterol ,100 mg/dl (2.6 mmol/l), HDL cholesterol .45 mg/dl (1.1 mmol/l), triglycerides ,150 mg/dl (1.7 mmol/l), systolic blood pressure ,120 mmHg, and diastolic blood pressure ,80 mmHg. Age, sex, and glycemic control had little influence on these goa…	Knoweledge that aggressive management of lipid levls and BP in children with T1DM is associated with lower CVD risk	Increased relative risk of CVD related event with LDL > 160, TG >200 among persons with a historyof T1DM	B>H	Study does not include persons with a history of T2DM (a potentially higher risk population). Underrecording of BP in this study.
PICOT4	493	added	Copeland KC, Zeitler P, Geffner M, Guandalini C, Higgins J, Hirst K, Kaufman FR, Linder B, Marcovina S, McGuigan P, Pyle L, Tamborlane W, Willi S; TODAY Study Group	26	8.2	2011	Characteristics of adolescents and youth with recent-onset type 2 diabetes: the TODAY cohort at baseline	J Clin Endocrinol Metab	Copeland KC, Zeitler P, Geffner M, Guandalini C, Higgins J, Hirst K, Kaufman FR, Linder B, Marcovina S, McGuigan P, Pyle L, Tamborlane W, Willi S; TODAY Study Group.. Characteristics of adolescents and youth with recent-onset type 2 diabetes: the TODAY cohort at baseline. J Clin Endocrinol Metab. 2011 Jan;96(1):159-67	C	Cross-sectional study	Children and adolescents	N= 704	Children 10–17 yrs of age with type 2 diabetes for less than 2 yr and had a body mass index at the 85th percentile or greater (participants of the TODAY study)	Unknown	Participants were randomized to one of 3 treatment arms: (1) metformin alone (M), (2) metformin plus rosiglitazone (M+R), and (3) metformin plus intensive an lifestyle program (M+L). Treatment with M+R was superior to M in preventing loss of glycemic control in youth with type 2 diabetes; M+L was not different from M or M+R	N/A	N/A	Unknown	At baseline the cohort included the following: 64.9% were female; mean age was 14.0 yr; mean diabetes duration was 7.8 months; mean body mass index Z-score was 2.15; 89.4% had a family history of diabetes; 41.1% were Hispanic, 31.5% were non-Hispanic black; 38.8% were living with both biological parents; 41.5% had a household annual income of less than $25,000; 26.3% had a highest education level…	Knowledge of prevalence of hypertension among children with DM	None reported	B>H
PICOT4	494	added	Klingensmith GJ, Connor CG, Ruedy KJ, Beck RW, Kollman C, Haro H, Wood JR, Lee JM, Willi SM, Cengiz E, Tamborlane WV; Pediatric Diabetes Consortium	26	8.2	2016	Presentation of youth with type 2 diabetes in the Pediatric Diabetes Consortium	Pediatr Diabetes	Klingensmith GJ, Connor CG, Ruedy KJ, Beck RW, Kollman C, Haro H, Wood JR, Lee JM, Willi SM, Cengiz E, Tamborlane WV; Pediatric Diabetes Consortium.. Presentation of youth with type 2 diabetes in the Pediatric Diabetes Consortium. Pediatr Diabetes. 2016 Jun;17(4):266-73	C	Cross-sectional study	Children	N= 503	T2DM	Unknown	N/A	N/A	N/A	Unknown	demographics of T2D in youth indicate significant social vulnerability which may affect outcomes. Metformin and insulin were the initial treatment in most youth. Importantly, T2D may occur at younger ages than previously thought and should be considered in all high-risk children presenting with diabetes	Knowledge of T2DM in the pediatric population	Younger age patients presenting with T2DM	B>H
PICOT4	495	added	Shah AS, Dolan LM, Gao Z, Kimball TR, Urbina EM	26	8.2	2012	Racial differences in arterial stiffness among adolescents and young adults with type 2 diabetes	Pediatr Diabetes	Shah AS, Dolan LM, Gao Z, Kimball TR, Urbina EM. Racial differences in arterial stiffness among adolescents and young adults with type 2 diabetes. Pediatr Diabetes. 2012 Mar;13(2):170-5	C	Cross-sectional study	Adolescents and young adults	N= 119 African Americans, N= 96 Caucasians	Adolescents and young adults with T2DM, single center; multi-race, multi-ethnic population	N/A	N/A	N/A	Pulse wave velocity (PWV) and augmentation index (Aix)	N/A	Compared to Caucasians, African Americans had increased PWV (6.21 ± 0.87 vs 6.96 ± 1.30, p<0.01) and AIx (4.44 ± 11.17 vs 7.64 ± 12.02, p= 0.05). Regression modeling demonstrated age, lipids, blood pressure and duration of diabetes were differently associated with arterial stiffness in each race group (p <0.05).	Knowleddge of the association between race pulse wave velocity (higher velocities in African Americans than Caucasians).	Assumption that increased PWV is related to race versus the presence of other comorbid conditions	B>H	Single center; limited knowledge of the clinical significance of the detected difference in PWV.
PICOT4	496	added	TODAY Study Group	26	8.2	2013	Rapid rise in hypertension and nephropathy in youth with type 2 diabetes: the TODAY clinical trial	Diabetes Care	TODAY Study Group.. Rapid rise in hypertension and nephropathy in youth with type 2 diabetes: the TODAY clinical trial. Diabetes Care. 2013 Jun;36(6):1735-41. doi: 10.2337/dc12-2420. Erratum in: Diabetes Care. 2013 Aug;36(8):2448	A	Randomized trial	Children and adolescents	N= 699	Participants in the TODAY trial; Children and adolescents 10–17 years of age, <2 years duration of type 2 diabetes, BMI > 85%, HbA1c #8% on metformin therapy, controlled blood pressure (BP), and calculated creatinine clearance .70 mL/min	1	metformin, metformin plus rosiglitazone, or metformin plus intensive lifestyle intervention	N/A	Urinalysis for microalbuminuria	No - single measurement (at the time of the vist),despite multiple visits	Prevalence of hypertension and microalbuminuria increased over time among adolescents with type 2 diabetes regardless of diabetes treatment.	Regardless of treatment , prevalence of hypertension and microalbuminuria increased over time among adolescents with T2DM	Prevalence of hypertension increased from 11.6% at baseline to 33.8% by end of study	B>H	Urine collected was not always a first morning urine.
PICOT4	497	added	Shah AS, Khoury PR, Dolan LM, Ippisch HM, Urbina EM, Daniels SR, Kimball TR	26	8.2	2011	The effects of obesity and type 2 diabetes mellitus on cardiac structure and function in adolescents and young adults	Diabetologia	Shah AS, Khoury PR, Dolan LM, Ippisch HM, Urbina EM, Daniels SR, Kimball TR. The effects of obesity and type 2 diabetes mellitus on cardiac structure and function in adolescents and young adults. Diabetologia. 2011 Apr;54(4):722-30	C	Cross-sectional study	Children	N= 612	Adolescents and young adults lean w/ T2DM, obese w/ T2DM,leadn w/o T2DM and obese w/ T2DM	4- mecury sphyngomanometer	N/A	Obese control patients without T2DM	LVH (LVM indexed to height ^2.7 >51gm/m^2.7) and RWT (>0.43)	Unknown	Adolescents with obesity and obesity-related type 2 diabetes were found to have abnormal cardiac geometry compared with lean controls (16% and 20% vs <1%, p<0.05). These two groups also had increased systolic function. Diastolic function decreased from the lean to obese to obese diabetic groups with the lowest diastolic function observed in the obese diabetic group (p <0.05)	Knowledge that adolescents with obesity and obesity-related type 2 diabetes demonstrate changes in cardiac geometry consistent with cardiac remodelling as well as decreased diastolic function.	T2DM and obesity are associated with cardiac remodelling and decreased diastolic function.	B>H	Cross-sectional design.
PICOT4	498	added	Nambam B, DuBose SN, Nathan BM, Beck RW, Maahs DM, Wadwa RP, Tamborlane WV, Foster NC, Miller KM, Haller MJ; T1D Exchange Clinic Network	26	8.2	2016	Therapeutic inertia: underdiagnosed and undertreated hypertension in children participating in the T1D Exchange Clinic Registry	Pediatr Diabetes	Nambam B, DuBose SN, Nathan BM, Beck RW, Maahs DM, Wadwa RP, Tamborlane WV, Foster NC, Miller KM, Haller MJ; T1D Exchange Clinic Network.. Therapeutic inertia: underdiagnosed and undertreated hypertension in children participating in the T1D Exchange Clinic Registry. Pediatr Diabetes. 2016 Feb;17(1):15-20	C	Cross-sectional study	Children	N= 9362	T1DM	Unknown- physician diagnosed	N/A	N/A	BP	Unknown	HTN was diagnosed in only 1% (113/9362) of participants; yet, elevated BP was recorded at one of the two visits in 17% and at both visits in 4%. Among those with diagnosed HTN, only 52% (59/113) were receiving ACE-I/ARB therapy and only 32% (19 of 59) of those treated were at goal BP	Knowledge of the prevalence of missed diagnosis of HTN in children with T1DM	Diagnosis of HTN is often missed among children with T2DM	B>H	Cross-sectional design. Diagnosis of HTN based on physician diagnosis.
PICOT4	503	added	Martino F, Puddu PE, Pannarale G, Colantoni C, Martino E, Zanoni C, Barillà F	N/A	9.1	2013	Hypertension in children and adolescents attending a lipid clinic	Eur J Pediatr	Martino F, Puddu PE, Pannarale G, Colantoni C, Martino E, Zanoni C, Barillà F. Hypertension in children and adolescents attending a lipid clinic. Eur J Pediatr. 2013 Dec;172(12):1573-9	C	Cross-sectional study	Children	N=370	Italian children (no race or alternative ethnicity indicated) with dyslididemia	4- merccury sphyngomanometer	N/A	N/A	Anthropometrtic data	Yes- At least 3 measurements	Higher prevlanece of hypertension among children with dyslipidemia.	N/A	N/A	N/A	Observational study. Causality cannot be determined.
PICOT4	504	added	Rodríguez-Morán M, Guerrero-Romero F, Aradillas-García C, Bermudez-Peña C,	N/A	9.1	2013	Simental-Mendia LE, Vargas Morales JM, Torres Rodríguez ML, de la Cruz Mendoza E. Atherogenic indices and prehypertension in obese and non-obese children. Diab	Vasc Dis Res	Rodríguez-Morán M, Guerrero-Romero F, Aradillas-García C, Bermudez-Peña C, Simental-Mendia LE, Vargas Morales JM, Torres Rodríguez ML, de la Cruz Mendoza E. Atherogenic indices and prehypertension in obese and non-obese children. Diab Vasc Dis Res. 2013 Jan;10(1):17-24	C	Cross-sectional study	Children	N=1237, N=104 pre-hypertensive and N=1133 normotensive children	Mexican children; no alternative ethnicities described; No racial distintions made	4- Mercury sphyngomanometer	N/A	Normotensive children	Blood pressure	No- 2 measurements onlly	Among pre-HTN versus normal weight children, there is a higher prevalence of the following:BMI, waiste circumference, fasting insuling, HOMA, total cholesterol, TG, HDL, LDL, LDL/HDL ratio, TG, Total cholesterol/HDL ratio. Among obese versus non-obese children, waiste circumference is higher among pre-HTN versus normal weight children. TG/HDL ratio is associated with preHTN regardless of obesity …	N/A	N/A	B=H	N/A
PICOT4	505	added	Li J, Motsko SP, Goehring EL Jr, Vendiola R, Maneno M, Jones JK	N/A	9.1	2010	Longitudinal study on pediatric dyslipidemia in population-based claims database	Pharmacoepidemiol Drug Saf	Li J, Motsko SP, Goehring EL Jr, Vendiola R, Maneno M, Jones JK. Longitudinal study on pediatric dyslipidemia in population-based claims database. Pharmacoepidemiol Drug Saf. 2010 Jan;19(1):90-8	B	Retrospective Cohort Study	Children	N=62,451 with lab defined dyslipidemia, N=24,140 with diagnosis and treatment defined dyslipidemia, N=70,425 gender-age patched controls	Children in insurance claim database	Unknown	N/A	Age-gender matched controls	HTN, overweight, DM	Unknown	HTN, overweight and diabetes were 5X's more common in children w/ lab defined dyslipidemia versus gender-age matched controls and even greater prevalence in children with treatment defined dyslipidemia	N/A	N/A	B=H	Observation study.
PICOT4	506	added	Liao CC, Su TC, Chien KL, Wang JK, Chiang CC, Lin CC, Lin RS, Lee YT, Sung FC	N/A	9.1	2009	Elevated blood pressure, obesity, and hyperlipidemia	J Pediatr	Liao CC, Su TC, Chien KL, Wang JK, Chiang CC, Lin CC, Lin RS, Lee YT, Sung FC. Elevated blood pressure, obesity, and hyperlipidemia. J Pediatr. 2009 Jul;155(1):79-83, 83.e1	C	Observational study	Children	N=17,548 children with hypertension	Twainese population with abnormal urinalysis	Unknown	N/A	Children without hyperetnsion	SBP, DBP, total cholesterol, albumin, BUN, Cr, GFR	Unknown	Mean SBP, DBP, and TCOL levels were consistently higher in subjects with hypertension than in control subjects	N/A	N/A	B=H	Observation study.
PICOT4	508	added	Kuo YL, Kang KT, Chiu SN, Weng WC, Lee PL, Hsu WC	N/A	9.2	2015	Blood pressure after surgery among obese and nonobese children with obstructive sleep apnea	Otolaryngol Head Neck Surg	Kuo YL, Kang KT, Chiu SN, Weng WC, Lee PL, Hsu WC. Blood pressure after surgery among obese and nonobese children with obstructive sleep apnea. Otolaryngol Head Neck Surg. 2015 May;152(5):931-40	D	Retrospective cohort study	Children	N= 78	Obese (N=39) and non-obese (N=39) children status post adenotonsillectomy	4- electronic sphyngomonometer	adenotonsillectomy	N/A	BP	Yes- 3 measurements	Following adenotonsillectomy, the nonobese group had a significantly decreased nocturnal diastolic blood pressure (DBP) index (–12.0 to -18.8, P = 0.018), morning systolic blood pressure (SBP; 111.1 to 105.8 mm Hg, P =0 .014), SBP index (–5.4 to -10.9, P = 0.008), and DBP (–12.0 to -18.7, P = 0.023).	Adnenotonsillectomy is beneficial in reducing BP in non-obese children	Adenotonsillectomy is not has effective in reducing BP in obese children with OSA	B>H	Sample sizes.
[truncated: 35 more rows]
